# Supplementary material for: miRNAs Predicted to Regulate Host Anti-viral Gene Pathways in IPNV-Challenged Atlantic Salmon Fry Are Affected by Viral Load, and Associated With the Major IPN Resistance QTL Genotypes in Late Infection
Source: Front Immunol. 2020 Sep 11;11:2113. doi: 10.3389/fimmu.2020.02113 (PMC7516080; doi:10.3389/fimmu.2020.02113)
Supplement: Supplementary file 4 [file Table_4.XLSX]

## Sheet: Table S4
Table S4. Predicted target genes of IPNV-DE and HVL-DE miRNAs
miRNA	Target gene accession	Target gene description	Gene symbol	Target sequence (3' UTR) length	miRNA sequence length	Minimal-free-energy (Kcal)	Position in 3' UTR that miRNA targeted
ssa-miR-462a-3p	BT044026.1	IFN-inducible protein Gig2-like-1		490	22	-25.8	211
ssa-miR-129-5p	BT045378.1, NM_001140177.1	Probable ATP-dependent RNA helicase DHX58 (EC 3.6.4.13)	DHX58 dhx58	782	21	-23.2	375
ssa-miR-26d-5p	BT045378.1, NM_001140177.1	Probable ATP-dependent RNA helicase DHX58 (EC 3.6.4.13)	DHX58 dhx58	782	22	-23.1	522
ssa-miR-731-5p	BT045378.1, NM_001140177.1	Probable ATP-dependent RNA helicase DHX58 (EC 3.6.4.13)	DHX58 dhx58	782	23	-20.4	155
ssa-miR-29d-5p	BT046021.1	Interferon-induced protein with tetratricopeptide repeats 5	IFIT5	717	23	-24.1	346
ssa-miR-30c-d-1-3p	BT047306.1, NM_001140862.1	Cholesterol 25-hydroxylase-like protein A	C25HA c25ha	485	22	-20.6	315
ssa-miR-30d-2-3p	BT047306.1, NM_001140862.1	Cholesterol 25-hydroxylase-like protein A	C25HA c25ha	485	23	-21.1	315
ssa-miR-125b-3-3p	BT048322.2 , NM_001141116.2	Receptor-transporting protein 3	RTP3 rtp3	665	22	-32.4	305
ssa-miR-29a-3p	BT048322.2 , NM_001141116.2	Receptor-transporting protein 3	RTP3 rtp3	665	20	-21.4	338
ssa-miR-29b-3p	BT048322.2 , NM_001141116.2	Receptor-transporting protein 3	RTP3 rtp3	665	22	-21.5	351
ssa-miR-29c-3p	BT048322.2 , NM_001141116.2	Receptor-transporting protein 3	RTP3 rtp3	665	22	-21.4	338
ssa-miR-29de-3p	BT048322.2 , NM_001141116.2	Receptor-transporting protein 3	RTP3 rtp3	665	20	-23.1	338
ssa-miR-21a-2-3p	BT049316.2	Barrier-to-autointegration factor (barrier-to-autointegration factor-like)	LOC106594559 BAF	253	22	-19.8	2
ssa-miR-21b-3p	BT049316.2	Barrier-to-autointegration factor (barrier-to-autointegration factor-like)	LOC106594559 BAF	253	22	-21.2	9
ssa-miR-727b-3p	BT049316.2	Barrier-to-autointegration factor (barrier-to-autointegration factor-like)	LOC106594559 BAF	253	19	-21.1	51
ssa-let-7b-3p	BT049358.1	Tumor necrosis factor receptor superfamily member 11B (tumor necrosis factor receptor superfamily member 11B-like)	TR11B LOC106574253 LOC106596966 LOC106598140 LOC106598178 LOC106598220	232	22	-22.9	121
ssa-let-7d-c-1-3p	BT049358.1	Tumor necrosis factor receptor superfamily member 11B (tumor necrosis factor receptor superfamily member 11B-like)	TR11B LOC106574253 LOC106596966 LOC106598140 LOC106598178 LOC106598220	232	22	-21.8	125
ssa-miR-29d-5p	BT049358.1	Tumor necrosis factor receptor superfamily member 11B (tumor necrosis factor receptor superfamily member 11B-like)	TR11B LOC106574253 LOC106596966 LOC106598140 LOC106598178 LOC106598220	232	23	-27.4	178
ssa-miR-125b-3-3p	BT049507.1	Complement factor D (complement factor D-like)	CFAD LOC106584449	726	22	-29.8	464
ssa-miR-8159-5p	BT049507.1	Complement factor D (complement factor D-like)	CFAD LOC106584449	726	24	-19.3	496
ssa-miR-10b-5p	BT049801.1, BT125321.1, XM_014172597.1	C-C motif chemokine	CCL19 LOC106585878	748	22	-23.6	94
ssa-miR-10d-5p	BT049801.1, BT125321.1, XM_014172597.1	C-C motif chemokine	CCL19 LOC106585878	748	22	-25.2	94
ssa-miR-193a-5p	BT049801.1, BT125321.1, XM_014172597.1	C-C motif chemokine	CCL19 LOC106585878	748	21	-22.1	439
ssa-miR-26a-3-3p	BT049801.1, BT125321.1, XM_014172597.1	C-C motif chemokine	CCL19 LOC106585878	748	22	-25	94
ssa-miR-731-3p	BT049801.1, BT125321.1, XM_014172597.1	C-C motif chemokine	CCL19 LOC106585878	748	22	-18.5	42
ssa-miR-8158-3p	BT049801.1, BT125321.1, XM_014172597.1	C-C motif chemokine	CCL19 LOC106585878	748	23	-20.2	242
ssa-miR-novel-13-5p	BT049801.1, BT125321.1, XM_014172597.1	C-C motif chemokine	CCL19 LOC106585878	748	22	-31.4	565
ssa-miR-146a-1-2-3p	BT058829.1, NM_001165350.1	SH3 and PX domain-containing protein 2B	SPD2B spd2b	1873	23	-19.5	1529
ssa-miR-146a-3-3p	BT058829.1, NM_001165350.1	SH3 and PX domain-containing protein 2B	SPD2B spd2b	1873	22	-18.1	1547
ssa-miR-146b-3p	BT058829.1, NM_001165350.1	SH3 and PX domain-containing protein 2B	SPD2B spd2b	1873	22	-18.1	1548
ssa-miR-183-5p	BT058829.1, NM_001165350.1	SH3 and PX domain-containing protein 2B	SPD2B spd2b	1873	22	-21.8	1534
ssa-miR-29b-3-5p	BT058829.1, NM_001165350.1	SH3 and PX domain-containing protein 2B	SPD2B spd2b	1873	23	-22.6	1374
ssa-miR-8159-5p	BT058829.1, NM_001165350.1	SH3 and PX domain-containing protein 2B	SPD2B spd2b	1873	24	-25.9	1360
ssa-miR-novel-2-3p	BT058829.1, NM_001165350.1	SH3 and PX domain-containing protein 2B	SPD2B spd2b	1873	22	-24.4	980
ssa-let-7b-3p	BT058906.1, NM_001165385.1	Macrosialin (Macrosialin precursor)	CD68 cd68	1727	22	-19.6	166
ssa-miR-462a-3p	BT058906.1, NM_001165385.1	Macrosialin (Macrosialin precursor)	CD68 cd68	1727	22	-22.1	832
ssa-miR-462a-3p	BT058906.1, NM_001165385.1	Macrosialin (Macrosialin precursor)	CD68 cd68	1727	22	-22.1	922
ssa-miR-462a-3p	BT058906.1, NM_001165385.1	Macrosialin (Macrosialin precursor)	CD68 cd68	1727	22	-22.1	1030
ssa-miR-462a-3p	BT058906.1, NM_001165385.1	Macrosialin (Macrosialin precursor)	CD68 cd68	1727	22	-22.1	1066
ssa-miR-462a-3p	BT058906.1, NM_001165385.1	Macrosialin (Macrosialin precursor)	CD68 cd68	1727	22	-22.1	1138
ssa-miR-731-5p	BT058906.1, NM_001165385.1	Macrosialin (Macrosialin precursor)	CD68 cd68	1727	23	-18.4	285
ssa-miR-18b-3p	BT059022.1	CRFB4a (Interleukin-10 receptor beta chain) (interleukin-10 receptor subunit beta-like)	I10R2 LOC106581741	2333	24	-24.8	380
ssa-miR-221-5p	BT059022.1	CRFB4a (Interleukin-10 receptor beta chain) (interleukin-10 receptor subunit beta-like)	I10R2 LOC106581741	2333	23	-21.8	708
ssa-miR-29b-2-5p	BT059022.1	CRFB4a (Interleukin-10 receptor beta chain) (interleukin-10 receptor subunit beta-like)	I10R2 LOC106581741	2333	25	-21.1	36
ssa-miR-29c-5p	BT059022.1	CRFB4a (Interleukin-10 receptor beta chain) (interleukin-10 receptor subunit beta-like)	I10R2 LOC106581741	2333	23	-21.1	602
ssa-miR-29c-5p	BT059022.1	CRFB4a (Interleukin-10 receptor beta chain) (interleukin-10 receptor subunit beta-like)	I10R2 LOC106581741	2333	23	-19.4	731
ssa-miR-30c-d-1-3p	BT059022.1	CRFB4a (Interleukin-10 receptor beta chain) (interleukin-10 receptor subunit beta-like)	I10R2 LOC106581741	2333	22	-18	178
ssa-miR-30d-2-3p	BT059022.1	CRFB4a (Interleukin-10 receptor beta chain) (interleukin-10 receptor subunit beta-like)	I10R2 LOC106581741	2333	23	-18.3	175
ssa-miR-8162-5p	BT059022.1	CRFB4a (Interleukin-10 receptor beta chain) (interleukin-10 receptor subunit beta-like)	I10R2 LOC106581741	2333	23	-21.2	1736
ssa-miR-8162-5p	BT059022.1	CRFB4a (Interleukin-10 receptor beta chain) (interleukin-10 receptor subunit beta-like)	I10R2 LOC106581741	2333	23	-21.1	1706
ssa-miR-10b-5p	BT059292.1	Interferon regulatory factor 3 (interferon regulatory factor 3 isoform X1)	IRF3 irf-3	1629	22	-24.1	1168
ssa-miR-10d-5p	BT059292.1	Interferon regulatory factor 3 (interferon regulatory factor 3 isoform X1)	IRF3 irf-3	1629	22	-24.2	1168
ssa-miR-18b-3p	BT059292.1	Interferon regulatory factor 3 (interferon regulatory factor 3 isoform X1)	IRF3 irf-3	1629	24	-21.7	1175
ssa-miR-21a-2-3p	BT059292.1	Interferon regulatory factor 3 (interferon regulatory factor 3 isoform X1)	IRF3 irf-3	1629	22	-27.3	805
ssa-miR-21b-3p	BT059292.1	Interferon regulatory factor 3 (interferon regulatory factor 3 isoform X1)	IRF3 irf-3	1629	22	-27.3	805
ssa-miR-29a-3p	BT059292.1	Interferon regulatory factor 3 (interferon regulatory factor 3 isoform X1)	IRF3 irf-3	1629	20	-18.3	1253
ssa-miR-29b-3-5p	BT059292.1	Interferon regulatory factor 3 (interferon regulatory factor 3 isoform X1)	IRF3 irf-3	1629	23	-22.4	356
ssa-miR-29b-3p	BT059292.1	Interferon regulatory factor 3 (interferon regulatory factor 3 isoform X1)	IRF3 irf-3	1629	22	-18.4	1251
ssa-miR-29c-3p	BT059292.1	Interferon regulatory factor 3 (interferon regulatory factor 3 isoform X1)	IRF3 irf-3	1629	22	-18.4	1253
ssa-miR-29de-3p	BT059292.1	Interferon regulatory factor 3 (interferon regulatory factor 3 isoform X1)	IRF3 irf-3	1629	20	-18.3	1253
ssa-miR-30c-d-1-3p	BT059292.1	Interferon regulatory factor 3 (interferon regulatory factor 3 isoform X1)	IRF3 irf-3	1629	22	-23.2	677
ssa-miR-30d-2-3p	BT059292.1	Interferon regulatory factor 3 (interferon regulatory factor 3 isoform X1)	IRF3 irf-3	1629	23	-25.5	676
ssa-miR-8159-5p	BT059292.1	Interferon regulatory factor 3 (interferon regulatory factor 3 isoform X1)	IRF3 irf-3	1629	24	-20.3	836
ssa-miR-novel-5-3p	BT059292.1	Interferon regulatory factor 3 (interferon regulatory factor 3 isoform X1)	IRF3 irf-3	1629	22	-21.5	584
ssa-miR-27a-2-5p	BT059527.1, NM_001139974.1	Jeltraxin	JELT	633	25	-21	159
ssa-miR-8159-5p	BT059527.1, NM_001139974.1	Jeltraxin	JELT	633	24	-21.5	424
ssa-miR-125b-3-3p	BT059783.1, NM_001173900.1	Complement C1q subcomponent subunit B (complement component 1, q subcomponent, B chain precursor)	C1QB c1qb	1300	22	-26.9	1121
ssa-miR-2184-3p	BT059783.1, NM_001173900.1	Complement C1q subcomponent subunit B (complement component 1, q subcomponent, B chain precursor)	C1QB c1qb	1300	22	-18.1	570
ssa-miR-29a-5p	BT059783.1, NM_001173900.1	Complement C1q subcomponent subunit B (complement component 1, q subcomponent, B chain precursor)	C1QB c1qb	1300	23	-26.5	648
ssa-miR-29a-5p	BT059783.1, NM_001173900.1	Complement C1q subcomponent subunit B (complement component 1, q subcomponent, B chain precursor)	C1QB c1qb	1300	23	-25.3	219
ssa-miR-29a-5p	BT059783.1, NM_001173900.1	Complement C1q subcomponent subunit B (complement component 1, q subcomponent, B chain precursor)	C1QB c1qb	1300	23	-25.2	49
ssa-miR-29a-5p	BT059783.1, NM_001173900.1	Complement C1q subcomponent subunit B (complement component 1, q subcomponent, B chain precursor)	C1QB c1qb	1300	23	-25.2	99
ssa-miR-29a-5p	BT059783.1, NM_001173900.1	Complement C1q subcomponent subunit B (complement component 1, q subcomponent, B chain precursor)	C1QB c1qb	1300	23	-25.2	159
ssa-miR-29d-5p	BT059783.1, NM_001173900.1	Complement C1q subcomponent subunit B (complement component 1, q subcomponent, B chain precursor)	C1QB c1qb	1300	23	-25.9	269
ssa-miR-29d-5p	BT059783.1, NM_001173900.1	Complement C1q subcomponent subunit B (complement component 1, q subcomponent, B chain precursor)	C1QB c1qb	1300	23	-25.8	19
ssa-miR-29d-5p	BT059783.1, NM_001173900.1	Complement C1q subcomponent subunit B (complement component 1, q subcomponent, B chain precursor)	C1QB c1qb	1300	23	-25.8	79
ssa-miR-29d-5p	BT059783.1, NM_001173900.1	Complement C1q subcomponent subunit B (complement component 1, q subcomponent, B chain precursor)	C1QB c1qb	1300	23	-25.8	129
ssa-miR-29d-5p	BT059783.1, NM_001173900.1	Complement C1q subcomponent subunit B (complement component 1, q subcomponent, B chain precursor)	C1QB c1qb	1300	23	-25.8	189
ssa-miR-29e-5p	BT059783.1, NM_001173900.1	Complement C1q subcomponent subunit B (complement component 1, q subcomponent, B chain precursor)	C1QB c1qb	1300	23	-23.9	648
ssa-miR-29e-5p	BT059783.1, NM_001173900.1	Complement C1q subcomponent subunit B (complement component 1, q subcomponent, B chain precursor)	C1QB c1qb	1300	23	-23.5	219
ssa-miR-29e-5p	BT059783.1, NM_001173900.1	Complement C1q subcomponent subunit B (complement component 1, q subcomponent, B chain precursor)	C1QB c1qb	1300	23	-23.4	49
ssa-miR-29e-5p	BT059783.1, NM_001173900.1	Complement C1q subcomponent subunit B (complement component 1, q subcomponent, B chain precursor)	C1QB c1qb	1300	23	-23.4	99
ssa-miR-29e-5p	BT059783.1, NM_001173900.1	Complement C1q subcomponent subunit B (complement component 1, q subcomponent, B chain precursor)	C1QB c1qb	1300	23	-23.4	159
ssa-let-7d-c-1-3p	BT072354.1	Signal transducer and activator of transcription 3 (Fragment)	STAT3	1320	22	-19.2	1098
ssa-miR-10b-5p	BT072354.1	Signal transducer and activator of transcription 3 (Fragment)	STAT3	1320	22	-19	683
ssa-miR-10d-5p	BT072354.1	Signal transducer and activator of transcription 3 (Fragment)	STAT3	1320	22	-19.1	683
ssa-miR-18b-3p	BT072354.1	Signal transducer and activator of transcription 3 (Fragment)	STAT3	1320	24	-30.4	978
ssa-miR-727b-3p	BT072354.1	Signal transducer and activator of transcription 3 (Fragment)	STAT3	1320	19	-20.7	463
ssa-miR-8162-5p	BT072354.1	Signal transducer and activator of transcription 3 (Fragment)	STAT3	1320	23	-19.3	561
ssa-miR-29a-5p	EF672332.1, NM_001136545.1	Myeloid differentiation primary response protein MyD88	myd88	370	23	-20.7	206
ssa-miR-29e-5p	EF672332.1, NM_001136545.1	Myeloid differentiation primary response protein MyD88	myd88	370	23	-18.2	206
ssa-miR-183-5p	NM_001123522.1	Matrix metalloproteinase 13		310	22	-21.1	11
ssa-miR-222b-5p	NM_001123522.1	Matrix metalloproteinase 13		310	22	-24.2	66
ssa-miR-29b-1-5p	NM_001123522.1	Matrix metalloproteinase 13		310	23	-21.6	86
ssa-miR-10b-5p	NM_001123524.1	Serine/threonine protein kinase RAF1c	RAF1c raf1c	773	22	-27.5	518
ssa-miR-10d-5p	NM_001123524.1	Serine/threonine protein kinase RAF1c	RAF1c raf1c	773	22	-26.6	518
ssa-miR-183-5p	NM_001123524.1	Serine/threonine protein kinase RAF1c	RAF1c raf1c	773	22	-21.5	97
ssa-miR-456-3p	NM_001123524.1	Serine/threonine protein kinase RAF1c	RAF1c raf1c	773	22	-26.1	148
ssa-miR-122-5p	NM_001123525.1	Actin, cytoplasmic 1 (Beta-actin) [Cleaved into: Actin, cytoplasmic 1, N-terminally processed]	actb	261	22	-21.8	13
ssa-miR-183-5p	NM_001123525.1	Actin, cytoplasmic 1 (Beta-actin) [Cleaved into: Actin, cytoplasmic 1, N-terminally processed]	actb	261	22	-20.1	57
ssa-miR-10b-5p	NM_001123528.1	Thyrotropin subunit beta (Thyroid-stimulating hormone subunit beta) (TSH-B) (TSH-beta) (Thyrotropin beta chain)	tshb	412	22	-24.9	171
ssa-miR-10d-5p	NM_001123528.1	Thyrotropin subunit beta (Thyroid-stimulating hormone subunit beta) (TSH-B) (TSH-beta) (Thyrotropin beta chain)	tshb	412	22	-26.5	171
ssa-miR-222b-5p	NM_001123528.1	Thyrotropin subunit beta (Thyroid-stimulating hormone subunit beta) (TSH-B) (TSH-beta) (Thyrotropin beta chain)	tshb	412	22	-25.3	318
ssa-miR-novel-5-3p	NM_001123528.1	Thyrotropin subunit beta (Thyroid-stimulating hormone subunit beta) (TSH-B) (TSH-beta) (Thyrotropin beta chain)	tshb	412	22	-22.4	91
ssa-let-7b-3p	NM_001123529.1	Fork head domain protein	fkh	529	22	-24	315
ssa-let-7b-3p	NM_001123529.1	Fork head domain protein	fkh	529	22	-18.5	388
ssa-let-7d-c-1-3p	NM_001123529.1	Fork head domain protein	fkh	529	22	-24.9	310
ssa-miR-200b-5p	NM_001123529.1	Fork head domain protein	fkh	529	22	-21.4	50
ssa-miR-29a-3p	NM_001123529.1	Fork head domain protein	fkh	529	20	-23.6	11
ssa-miR-29b-3p	NM_001123529.1	Fork head domain protein	fkh	529	22	-27.4	14
ssa-miR-29c-3p	NM_001123529.1	Fork head domain protein	fkh	529	22	-23.9	14
ssa-miR-29de-3p	NM_001123529.1	Fork head domain protein	fkh	529	20	-20.4	11
ssa-miR-8159-5p	NM_001123529.1	Fork head domain protein	fkh	529	24	-26.7	469
ssa-miR-8159-5p	NM_001123529.1	Fork head domain protein	fkh	529	24	-18.9	497
ssa-let-7b-3p	NM_001123532.1	Heat shock protein 90-beta 1 (Heat shock protein hsp90 beta) (heat shock protein HSP 90-beta)	hsp90 beta HS90B hsp90ab1 hsp90b	371	22	-20.5	118
ssa-let-7d-c-1-3p	NM_001123532.1	Heat shock protein 90-beta 1 (Heat shock protein hsp90 beta) (heat shock protein HSP 90-beta)	hsp90 beta HS90B hsp90ab1 hsp90b	371	22	-18.1	118
ssa-miR-29c-5p	NM_001123532.1	Heat shock protein 90-beta 1 (Heat shock protein hsp90 beta) (heat shock protein HSP 90-beta)	hsp90 beta HS90B hsp90ab1 hsp90b	371	23	-18.5	172
ssa-miR-29c-5p	NM_001123534.1	Cystic fibrosis transmembrane conductance regulator (EC 5.6.1.6) (ATP-binding cassette sub-family C member 7) (Channel conductance-controlling ATPase) (cAMP-dependent chloride channel)	LOC100136366	746	23	-18.9	566
ssa-miR-727b-3p	NM_001123534.1	Cystic fibrosis transmembrane conductance regulator (EC 5.6.1.6) (ATP-binding cassette sub-family C member 7) (Channel conductance-controlling ATPase) (cAMP-dependent chloride channel)	LOC100136366	746	19	-21.8	68
ssa-miR-novel-5-3p	NM_001123534.1	Cystic fibrosis transmembrane conductance regulator (EC 5.6.1.6) (ATP-binding cassette sub-family C member 7) (Channel conductance-controlling ATPase) (cAMP-dependent chloride channel)	LOC100136366	746	22	-20.1	621
ssa-let-7d-c-1-3p	NM_001123535.1	Proteasome subunit beta (EC 3.4.25.1)	LMP7 lmp7b PSB8 PSMB8 psmb8b	627	22	-18.3	518
ssa-let-7f-5p	NM_001123536.1	Rhodopsin	LOC100136369	910	22	-18.7	325
ssa-miR-146d-1-3p	NM_001123536.1	Rhodopsin	LOC100136369	910	22	-22.9	389
ssa-miR-18b-3p	NM_001123536.1	Rhodopsin	LOC100136369	910	24	-27.7	299
ssa-miR-459-3p	NM_001123537.1	Rhodopsin	LOC100136370	481	22	-18	296
ssa-miR-8159-5p	NM_001123537.1	Rhodopsin	LOC100136370	481	24	-24.1	394
ssa-miR-727b-3p	NM_001123540.1	Tyrosine-protein kinase (EC 2.7.10.2)	HCK hck	774	19	-23.3	28
ssa-miR-7a-2-6-3p	NM_001123540.1	Tyrosine-protein kinase (EC 2.7.10.2)	HCK hck	774	22	-21.7	441
ssa-miR-novel-2-3p	NM_001123540.1	Tyrosine-protein kinase (EC 2.7.10.2)	HCK hck	774	22	-20.5	46
ssa-miR-novel-5-3p	NM_001123540.1	Tyrosine-protein kinase (EC 2.7.10.2)	HCK hck	774	22	-23.4	36
ssa-miR-novel-5-3p	NM_001123540.1	Tyrosine-protein kinase (EC 2.7.10.2)	HCK hck	774	22	-20.2	439
ssa-miR-novel-5-3p	NM_001123540.1	Tyrosine-protein kinase (EC 2.7.10.2)	HCK hck	774	22	-19.7	240
ssa-miR-192a-1-3p	NM_001123541.2	Tetraspanin	cd9 CD9	1431	22	-20.9	488
ssa-miR-192b-5p	NM_001123541.2	Tetraspanin	cd9 CD9	1431	22	-20.9	488
ssa-miR-novel-13-5p	NM_001123541.2	Tetraspanin	cd9 CD9	1431	22	-20.7	1235
ssa-miR-462a-5p	NM_001123542.2	Delta-5 Fatty Acyl desaturase	Fadsd5 fadsd5	1088	23	-19.4	973
ssa-miR-183-5p	NM_001123543.1	Aryl hydrocarbon receptor 2 delta	AhR2d ahr2d	2103	22	-18.6	343
ssa-miR-1338-5p	NM_001123545.1	Cardiac hormone (cardiac hormone precursor)	LOC100136387	755	21	-20.8	391
ssa-miR-193a-5p	NM_001123545.1	Cardiac hormone (cardiac hormone precursor)	LOC100136387	755	21	-21.5	49
ssa-miR-187-5p	NM_001123546.1	Peroxisome proliferator activated receptor gamma, long form (peroxisome proliferator-activated receptor gamma)	PPAR pparg	707	24	-32.2	388
ssa-miR-456-3p	NM_001123547.1	Actinin-associated LIM protein (alkaline phosphatase) (EC 3.1.3.1)	alp	231	22	-25.4	20
ssa-miR-221-5p	NM_001123548.1	uncharacterized protein LOC100136396 precursor	LOC100136396	262	23	-22.7	23
ssa-miR-184-3p	NM_001123549.1	Myostatin 1a (myostatin 1a precursor)	GDF-8 gdf-8	1265	22	-24.7	342
ssa-miR-29c-5p	NM_001123549.1	Myostatin 1a (myostatin 1a precursor)	GDF-8 gdf-8	1265	23	-24	1152
ssa-miR-8162-5p	NM_001123549.1	Myostatin 1a (myostatin 1a precursor)	GDF-8 gdf-8	1265	23	-24.1	908
ssa-miR-novel-5-3p	NM_001123549.1	Myostatin 1a (myostatin 1a precursor)	GDF-8 gdf-8	1265	22	-23.2	285
ssa-miR-29a-5p	NM_001123550.1	Putative ST2L protein (putative ST2L protein isoform X3) (putative ST2L protein precursor)	st2	491	23	-19.2	284
ssa-miR-192a-1-3p	NM_001123551.1	Secreted phosphoprotein 24 (Spp-24) (Secreted phosphoprotein 2)	spp2 spp24	251	22	-21.2	159
ssa-miR-192b-5p	NM_001123551.1	Secreted phosphoprotein 24 (Spp-24) (Secreted phosphoprotein 2)	spp2 spp24	251	22	-21.9	141
ssa-miR-1338-5p	NM_001123553.1	Glutamate dehydrogenase (glutamate dehydrogenase 1, mitochondrial) (EC 1.4.1.3)	gdh3.1 DHE3 glud1	976	21	-18	1
ssa-miR-192a-1-3p	NM_001123553.1	Glutamate dehydrogenase (glutamate dehydrogenase 1, mitochondrial) (EC 1.4.1.3)	gdh3.1 DHE3 glud1	976	22	-20.9	385
ssa-miR-192b-5p	NM_001123553.1	Glutamate dehydrogenase (glutamate dehydrogenase 1, mitochondrial) (EC 1.4.1.3)	gdh3.1 DHE3 glud1	976	22	-21	385
ssa-miR-200b-5p	NM_001123553.1	Glutamate dehydrogenase (glutamate dehydrogenase 1, mitochondrial) (EC 1.4.1.3)	gdh3.1 DHE3 glud1	976	22	-22	863
ssa-miR-456-3p	NM_001123553.1	Glutamate dehydrogenase (glutamate dehydrogenase 1, mitochondrial) (EC 1.4.1.3)	gdh3.1 DHE3 glud1	976	22	-23.8	34
ssa-miR-8159-5p	NM_001123553.1	Glutamate dehydrogenase (glutamate dehydrogenase 1, mitochondrial) (EC 1.4.1.3)	gdh3.1 DHE3 glud1	976	24	-20.9	669
ssa-miR-21a-2-3p	NM_001123554.1	Myogenic factor	myod2	416	22	-20.6	262
ssa-miR-21b-3p	NM_001123554.1	Myogenic factor	myod2	416	22	-20.3	262
ssa-miR-29b-2-5p	NM_001123554.1	Myogenic factor	myod2	416	25	-20.2	139
ssa-miR-731-5p	NM_001123555.1	Lutropin-choriogonadotropic hormone receptor	lh-R lh-r LHCGR lhr	263	23	-20.9	196
ssa-miR-novel-2-3p	NM_001123562.1	Myeloid leukemia differentiation protein HOMOLOGUE	mcl-1	419	22	-22.6	104
ssa-miR-29c-5p	NM_001123563.1	Putative Odorant receptor ASOR1	LOC100136423	236	23	-18.7	156
ssa-let-7b-3p	NM_001123566.1	Prion protein (prion protein precursor)	LOC100136432	1218	22	-21.7	567
ssa-let-7d-c-1-3p	NM_001123566.1	Prion protein (prion protein precursor)	LOC100136432	1218	22	-24.8	567
ssa-let-7e-5p	NM_001123566.1	Prion protein (prion protein precursor)	LOC100136432	1218	22	-18	913
ssa-let-7f-5p	NM_001123566.1	Prion protein (prion protein precursor)	LOC100136432	1218	22	-19.3	908
ssa-miR-125b-3-3p	NM_001123566.1	Prion protein (prion protein precursor)	LOC100136432	1218	22	-22.5	697
ssa-miR-29b-2-5p	NM_001123571.1	Calcium polyvalent cation receptor 2 (calcium polyvalent cation receptor 2 precursor)	LOC100136437	956	25	-19.7	542
ssa-miR-731-5p	NM_001123571.1	Calcium polyvalent cation receptor 2 (calcium polyvalent cation receptor 2 precursor)	LOC100136437	956	23	-21.4	832
ssa-miR-29a-5p	NM_001123572.1	RhAG-like protein	LOC100136438	232	23	-27	116
ssa-miR-29e-5p	NM_001123572.1	RhAG-like protein	LOC100136438	232	23	-20.5	116
ssa-miR-100a-2-3p	NM_001123574.1	Glycoprotein hormones alpha chain	GLHA2 glha2	278	23	-20.9	24
ssa-miR-129-5p	NM_001123576.1	Growth hormone receptor isoform 1 (growth hormone receptor isoform 1 precursor) (growth hormone receptor isoform 1 precursor isoform X1)	GHR1 ghr1	852	21	-19.8	243
ssa-miR-192a-5p	NM_001123576.1	Growth hormone receptor isoform 1 (growth hormone receptor isoform 1 precursor) (growth hormone receptor isoform 1 precursor isoform X1)	GHR1 ghr1	852	21	-22.4	592
ssa-miR-200b-5p	NM_001123576.1	Growth hormone receptor isoform 1 (growth hormone receptor isoform 1 precursor) (growth hormone receptor isoform 1 precursor isoform X1)	GHR1 ghr1	852	22	-23	180
ssa-miR-129-5p	NM_001123577.1	Estrogen receptor beta	LOC100136443	313	21	-19	9
ssa-miR-21a-2-3p	NM_001123579.1	C type lectin receptor A	LOC100136446 C209E	728	22	-18.5	68
ssa-miR-21b-3p	NM_001123579.1	C type lectin receptor A	LOC100136446 C209E	728	22	-19.6	68
ssa-miR-29a-5p	NM_001123579.1	C type lectin receptor A	LOC100136446 C209E	728	23	-21.4	208
ssa-miR-29e-5p	NM_001123579.1	C type lectin receptor A	LOC100136446 C209E	728	23	-22.1	208
ssa-miR-30c-d-1-3p	NM_001123579.1	C type lectin receptor A	LOC100136446 C209E	728	22	-21.7	330
ssa-miR-30d-2-3p	NM_001123579.1	C type lectin receptor A	LOC100136446 C209E	728	23	-22.3	330
ssa-miR-29b-2-5p	NM_001123580.1	C type lectin receptor B	LOC100136447 CLC4E	246	25	-26.7	118
ssa-miR-183-5p	NM_001123581.1	C type lectin receptor C	LOC100136448	627	22	-19.9	405
ssa-miR-29a-5p	NM_001123583.1	CD8 alpha (CD8 alpha precursor)	LOC100136450	354	23	-23.6	281
ssa-miR-29e-5p	NM_001123583.1	CD8 alpha (CD8 alpha precursor)	LOC100136450	354	23	-21.4	281
ssa-miR-8162-5p	NM_001123583.1	CD8 alpha (CD8 alpha precursor)	LOC100136450	354	23	-19.4	71
ssa-miR-novel-5-3p	NM_001123584.1	CD8 beta (CD8 beta precursor)	LOC100136451	567	22	-20.2	466
ssa-miR-192a-5p	NM_001123585.1	Anti-mullerian hormone (anti-mullerian hormone precursor)	LOC100136452	541	21	-19	86
ssa-miR-29d-5p	NM_001123585.1	Anti-mullerian hormone (anti-mullerian hormone precursor)	LOC100136452	541	23	-23.2	303
ssa-miR-8159-5p	NM_001123586.1	Cathelicidin (cathelicidin precursor)	LOC100136453	343	24	-28.1	3
ssa-miR-143-3p	NM_001123588.1	Zonadhesin-like (zonadhesin-like precursor)	LOC100136455	273	21	-19.3	35
ssa-miR-222b-5p	NM_001123588.1	Zonadhesin-like (zonadhesin-like precursor)	LOC100136455	273	22	-24.4	16
ssa-miR-222b-5p	NM_001123589.1	Tumor necrosis factor alpha-1 (tumor necrosis factor alpha-1 precursor)	TNF-alpha-1 tnf-alpha-1	510	22	-23.1	68
ssa-miR-novel-5-3p	NM_001123589.1	Tumor necrosis factor alpha-1 (tumor necrosis factor alpha-1 precursor)	TNF-alpha-1 tnf-alpha-1	510	22	-21.8	309
ssa-miR-222b-5p	NM_001123590.1	Tumor necrosis factor alpha-2 (tumor necrosis factor alpha-2 precursor)	TNF-alpha-2 tnf-alpha-2	543	22	-23.1	68
ssa-let-7a-1-3-3p	NM_001123594.1	Growth hormone receptor isoform 2 (growth hormone receptor isoform 2 precursor)	LOC100136463	814	22	-20	714
ssa-miR-192a-5p	NM_001123594.1	Growth hormone receptor isoform 2 (growth hormone receptor isoform 2 precursor)	LOC100136463	814	21	-23.2	565
ssa-miR-21a-2-3p	NM_001123596.1	Follistatin (follistatin precursor)	LOC100136466	1046	22	-19.2	540
ssa-miR-21b-3p	NM_001123596.1	Follistatin (follistatin precursor)	LOC100136466	1046	22	-19.1	540
ssa-miR-novel-2-3p	NM_001123596.1	Follistatin (follistatin precursor)	LOC100136466	1046	22	-23.4	673
ssa-miR-10b-5p	NM_001123601.1	Myogenic factor	myoD1c myod1c	506	22	-20.9	65
ssa-miR-10d-5p	NM_001123601.1	Myogenic factor	myoD1c myod1c	506	22	-21	65
ssa-miR-183-5p	NM_001123605.1	TAP binding protein (Tapasin)	TAPBP tapbp TPSN	1589	22	-24.4	939
ssa-miR-192a-1-3p	NM_001123605.1	TAP binding protein (Tapasin)	TAPBP tapbp TPSN	1589	22	-27.7	587
ssa-miR-192b-5p	NM_001123605.1	TAP binding protein (Tapasin)	TAPBP tapbp TPSN	1589	22	-32.4	587
ssa-miR-novel-5-3p	NM_001123607.1	Myogenic regulatory factor 4	mrf4 MYF6	417	22	-20.1	11
ssa-let-7e-5p	NM_001123610.1	Thyrotropin receptor	TSHR	727	22	-18.6	320
ssa-miR-125b-3-3p	NM_001123610.1	Thyrotropin receptor	TSHR	727	22	-22.5	291
ssa-miR-30d-2-3p	NM_001123610.1	Thyrotropin receptor	TSHR	727	23	-20.1	17
ssa-miR-10b-5p	NM_001123611.1	CD4-1-like protein (CD4-like protein isoform 1 precursor) (CD4-like protein isoform X1)	LOC100136502	617	22	-19.6	442
ssa-miR-10d-5p	NM_001123611.1	CD4-1-like protein (CD4-like protein isoform 1 precursor) (CD4-like protein isoform X1)	LOC100136502	617	22	-18.7	442
ssa-miR-8162-5p	NM_001123611.1	CD4-1-like protein (CD4-like protein isoform 1 precursor) (CD4-like protein isoform X1)	LOC100136502	617	23	-21.5	395
ssa-miR-146a-1-2-3p	NM_001123613.2	slow Myosin light chain 1	LOC100136504	174	23	-21.2	76
ssa-miR-146a-3-3p	NM_001123613.2	slow Myosin light chain 1	LOC100136504	174	22	-19.6	77
ssa-miR-727b-3p	NM_001123616.1	Ubiquitin-conjugating enzyme E2 variant 1 (ubiquitin-conjugating enzyme E2 variant 1-like)	LOC100136508	450	19	-21.5	247
ssa-miR-146d-1-3p	NM_001123617.1	Tumor necrosis factor alpha	LOC100136509	1041	22	-31.1	64
ssa-miR-183-5p	NM_001123617.1	Tumor necrosis factor alpha	LOC100136509	1041	22	-20.6	321
ssa-miR-192a-5p	NM_001123617.1	Tumor necrosis factor alpha	LOC100136509	1041	21	-18.4	97
ssa-miR-21a-2-3p	NM_001123617.1	Tumor necrosis factor alpha	LOC100136509	1041	22	-19.9	804
ssa-miR-21b-3p	NM_001123617.1	Tumor necrosis factor alpha	LOC100136509	1041	22	-19.8	804
ssa-miR-459-3p	NM_001123617.1	Tumor necrosis factor alpha	LOC100136509	1041	22	-20.5	38
ssa-miR-8159-5p	NM_001123617.1	Tumor necrosis factor alpha	LOC100136509	1041	24	-20.3	501
ssa-miR-146a-1-2-3p	NM_001123618.1	C-C motif chemokine	LOC100136511	461	23	-21	314
ssa-miR-146a-3-3p	NM_001123618.1	C-C motif chemokine	LOC100136511	461	22	-19	325
ssa-miR-146b-3p	NM_001123618.1	C-C motif chemokine	LOC100136511	461	22	-21.1	325
ssa-miR-183-5p	NM_001123619.1	Thymidylate kinase		739	22	-21.4	62
ssa-miR-18c-3p	NM_001123619.1	Thymidylate kinase		739	22	-32.8	89
ssa-miR-29b-2-5p	NM_001123619.1	Thymidylate kinase		739	25	-19.6	505
ssa-miR-727b-3p	NM_001123619.1	Thymidylate kinase		739	19	-26.8	1
ssa-miR-727b-3p	NM_001123619.1	Thymidylate kinase		739	19	-18.3	12
ssa-miR-29b-1-5p	NM_001123621.1	CD3gammadelta-A (CD3gammadelta-A precursor)	LOC100136515	387	23	-19.4	250
ssa-miR-30d-2-3p	NM_001123622.1	CD3epsilon (CD3epsilon isoform 1 precursor)	LOC100136516	343	23	-18.5	288
ssa-miR-727b-3p	NM_001123622.1	CD3epsilon (CD3epsilon isoform 1 precursor)	LOC100136516	343	19	-18.3	4
ssa-let-7b-3p	NM_001123630.1	Transporter	slc6a6	2005	22	-21.5	762
ssa-let-7d-c-1-3p	NM_001123630.1	Transporter	slc6a6	2005	22	-18	763
ssa-miR-143-3p	NM_001123630.1	Transporter	slc6a6	2005	21	-22.3	1935
ssa-miR-21a-2-3p	NM_001123630.1	Transporter	slc6a6	2005	22	-19.6	454
ssa-miR-21a-2-3p	NM_001123630.1	Transporter	slc6a6	2005	22	-19.2	219
ssa-miR-21b-3p	NM_001123630.1	Transporter	slc6a6	2005	22	-21.5	472
ssa-miR-21b-3p	NM_001123630.1	Transporter	slc6a6	2005	22	-19.1	219
ssa-miR-29c-5p	NM_001123630.1	Transporter	slc6a6	2005	23	-18.6	1700
ssa-miR-731-5p	NM_001123632.1	Antithrombin (antithrombin protein precursor)	antithrombin Serpinc1	126	23	-18.2	11
ssa-miR-122-5p	NM_001123633.1	Interleukin-1 receptor type I (Interleukin-1 receptor-like protein) (interleukin-1 receptor-like protein isoform X1) (interleukin-1 receptor-like protein precursor)	IL-1RL il-1rl IL1R1	860	22	-22.4	229
ssa-miR-29b-2-5p	NM_001123636.1	Glutamate dehydrogenase	gdh2 DHE3	792	25	-21.5	526
ssa-miR-29c-5p	NM_001123636.1	Glutamate dehydrogenase	gdh2 DHE3	792	23	-18.8	740
ssa-let-7e-5p	NM_001123639.1	Glycerol-3-phosphate dehydrogenase [NAD(+)] (EC 1.1.1.8)	LOC100136539	612	22	-24.4	156
ssa-let-7f-5p	NM_001123639.1	Glycerol-3-phosphate dehydrogenase [NAD(+)] (EC 1.1.1.8)	LOC100136539	612	22	-21	156
ssa-miR-29d-5p	NM_001123639.1	Glycerol-3-phosphate dehydrogenase [NAD(+)] (EC 1.1.1.8)	LOC100136539	612	23	-22.7	14
ssa-miR-456-3p	NM_001123642.1	Phosphoenolpyruvate carboxykinase (phosphoenolpyruvate carboxykinase [GTP], mitochondrial) (EC 4.1.1.49)	pck2 PPCKM	884	22	-26.8	1
ssa-miR-731-3p	NM_001123642.1	Phosphoenolpyruvate carboxykinase (phosphoenolpyruvate carboxykinase [GTP], mitochondrial) (EC 4.1.1.49)	pck2 PPCKM	884	22	-18.2	79
ssa-miR-459-3p	NM_001123643.1	Tyrosinase (tyrosinase precursor) (EC 1.14.18.1)	LOC100136546	305	22	-23.1	258
ssa-miR-30c-d-1-3p	NM_001123644.1	Myogenic factor	myf5	641	22	-23.6	233
ssa-miR-30d-2-3p	NM_001123644.1	Myogenic factor	myf5	641	23	-21.6	233
ssa-miR-222b-5p	NM_001123654.1	Signal transducer and activator of transcription	LOC100136558 STAT1 STAT1a	516	22	-24.9	28
ssa-miR-184-3p	NM_001123655.1	Serotransferrin-1 (Serotransferrin I) (STF I) (sTF1) (Siderophilin I)	tf1	439	22	-28.2	287
ssa-miR-18c-3p	NM_001123658.1	Ferritin, middle subunit (Ferritin M) (EC 1.16.3.1)		288	22	-23.6	121
ssa-miR-222b-5p	NM_001123658.1	Ferritin, middle subunit (Ferritin M) (EC 1.16.3.1)		288	22	-30.2	185
ssa-miR-456-3p	NM_001123658.1	Ferritin, middle subunit (Ferritin M) (EC 1.16.3.1)		288	22	-22.1	16
ssa-miR-462a-3p	NM_001123658.1	Ferritin, middle subunit (Ferritin M) (EC 1.16.3.1)		288	22	-21.8	15
ssa-let-7e-5p	NM_001123665.1	Serum albumin 1	alb1	337	22	-23.7	76
ssa-let-7f-5p	NM_001123665.1	Serum albumin 1	alb1	337	22	-20.4	78
ssa-miR-129-5p	NM_001123665.1	Serum albumin 1	alb1	337	21	-18.2	308
ssa-miR-456-3p	NM_001123665.1	Serum albumin 1	alb1	337	22	-28.1	83
ssa-miR-459-3p	NM_001123669.1	Metallothionein B (MT-B)	mtb	108	22	-24.4	3
ssa-miR-731-5p	NM_001123670.1	POU domain protein	pit-1	457	23	-22	367
ssa-miR-26a-3-3p	NM_001123673.1	Transport-associated protein (transport-associated protein precursor)	tap1	450	22	-19.4	148
ssa-miR-29b-2-5p	NM_001123674.1	Hepatocyte nuclear factor 1-alpha (HNF-1-alpha) (HNF-1A) (Transcription factor 1) (TCF-1) (sHNF1)	hnf1a hnf1 tcf1	395	25	-24.7	163
ssa-miR-100a-5p	NM_001123675.1	Mx3 protein	LOC100136587	516	22	-22.6	62
ssa-miR-29a-3p	NM_001123676.1	Somatotropin (Growth hormone)	gh	480	20	-24	297
ssa-miR-29b-3p	NM_001123676.1	Somatotropin (Growth hormone)	gh	480	22	-23.3	297
ssa-miR-29c-3p	NM_001123676.1	Somatotropin (Growth hormone)	gh	480	22	-24	297
ssa-miR-29de-3p	NM_001123676.1	Somatotropin (Growth hormone)	gh	480	20	-25	297
ssa-miR-459-3p	NM_001123677.1	Metallothionein A (MT-A)	mta	112	22	-20.5	2
ssa-miR-29b-1-5p	NM_001123678.1	Homeobox protein	LOC100136797	1198	23	-19	87
ssa-miR-29d-5p	NM_001123678.1	Homeobox protein	LOC100136797	1198	23	-20.8	270
ssa-miR-456-3p	NM_001123678.1	Homeobox protein	LOC100136797	1198	22	-26.3	1
ssa-miR-novel-5-3p	NM_001123678.1	Homeobox protein	LOC100136797	1198	22	-22	1082
ssa-miR-novel-5-3p	NM_001123678.1	Homeobox protein	LOC100136797	1198	22	-19.4	902
ssa-miR-30c-d-1-3p	NM_001123680.1	Homeobox protein	LOC100136799	645	22	-23.6	243
ssa-miR-30d-2-3p	NM_001123680.1	Homeobox protein	LOC100136799	645	23	-21.6	243
ssa-miR-30d-2-3p	NM_001123680.1	Homeobox protein	LOC100136799	645	23	-18.2	63
ssa-miR-132-1-2-5p	NM_001123681.1	Homeobox protein	LOC100136800	720	22	-22.2	419
ssa-miR-122-5p	NM_001123683.1	Na/K/2Cl co-transporter	NKCC1a nkcc1a	105	22	-26.6	74
ssa-miR-726-3p	NM_001123684.1	Aryl hydrocarbon receptor 2 alpha	ahr2a	551	22	-20.8	140
ssa-miR-29b-2-5p	NM_001123685.1	Calcium polyvalent cation receptor 3		1109	25	-19.7	657
ssa-miR-731-5p	NM_001123685.1	Calcium polyvalent cation receptor 3		1109	23	-21.4	947
ssa-miR-129-5p	NM_001123687.1	Cytochrome P450 1A (cytochrome P450, family 1, subfamily A) (EC 1.14.14.1) (cytochrome P450, family 1, subfamily A isoform X1)	CYP1A cyp1a	1025	21	-18.5	987
ssa-miR-27d-1-5p	NM_001123687.1	Cytochrome P450 1A (cytochrome P450, family 1, subfamily A) (EC 1.14.14.1) (cytochrome P450, family 1, subfamily A isoform X1)	CYP1A cyp1a	1025	24	-18.2	763
ssa-miR-29b-1-5p	NM_001123687.1	Cytochrome P450 1A (cytochrome P450, family 1, subfamily A) (EC 1.14.14.1) (cytochrome P450, family 1, subfamily A isoform X1)	CYP1A cyp1a	1025	23	-20.3	652
ssa-miR-29b-2-5p	NM_001123687.1	Cytochrome P450 1A (cytochrome P450, family 1, subfamily A) (EC 1.14.14.1) (cytochrome P450, family 1, subfamily A isoform X1)	CYP1A cyp1a	1025	25	-24	652
ssa-miR-30c-d-1-3p	NM_001123687.1	Cytochrome P450 1A (cytochrome P450, family 1, subfamily A) (EC 1.14.14.1) (cytochrome P450, family 1, subfamily A isoform X1)	CYP1A cyp1a	1025	22	-19.7	955
ssa-miR-30d-2-3p	NM_001123687.1	Cytochrome P450 1A (cytochrome P450, family 1, subfamily A) (EC 1.14.14.1) (cytochrome P450, family 1, subfamily A isoform X1)	CYP1A cyp1a	1025	23	-21	955
ssa-miR-181a-5-3p	NM_001123690.1	Mx2 protein (myxovirus resistance 2)	mx2	558	22	-21	140
ssa-miR-731-5p	NM_001123691.1	Toll-like leucine-rich repeat protein (toll-like leucine-rich repeat precursor)	TL/LRR tl/lrr	258	23	-20.7	14
ssa-let-7e-5p	NM_001123692.1	serum albumin 2 precursor	LOC100136922 alb2	337	22	-23.7	76
ssa-let-7f-5p	NM_001123692.1	serum albumin 2 precursor	LOC100136922 alb2	337	22	-20.4	78
ssa-miR-456-3p	NM_001123692.1	serum albumin 2 precursor	LOC100136922 alb2	337	22	-28.7	83
ssa-miR-8162-5p	NM_001123697.1	Eggshell protein (eggshell protein precursor)	LOC100136930	81	23	-18.4	42
ssa-miR-456-3p	NM_001123699.1	Beta-2-microglobulin	B2m b2m B2MG	870	22	-25	24
ssa-miR-novel-5-3p	NM_001123701.1	Homeobox protein	LOC100136935	177	22	-23.4	126
ssa-miR-novel-5-3p	NM_001123701.1	Homeobox protein	LOC100136935	177	22	-22.8	29
ssa-miR-30d-2-3p	NM_001123702.2	Proteasome subunit beta (EC 3.4.25.1)	PSB9 lmp2 lmp2a lmp2b PSMB9 psmb9 psmb9-a psmb9-b psmb9a psmb9b	461	23	-19.4	6
ssa-miR-10b-5p	NM_001123703.1	Homeobox protein		780	22	-18.7	301
ssa-miR-10d-5p	NM_001123703.1	Homeobox protein		780	22	-19.7	301
ssa-miR-129-5p	NM_001123703.1	Homeobox protein		780	21	-20.2	22
ssa-miR-183-5p	NM_001123703.1	Homeobox protein		780	22	-21.5	307
ssa-miR-459-3p	NM_001123703.1	Homeobox protein		780	22	-22.6	163
ssa-miR-183-5p	NM_001123708.1	SWS1 opsin (short wavelength-sensitive 1 opsin)	LOC100136943	2167	22	-19.1	385
ssa-miR-21b-3p	NM_001123713.1	BRD2 (bromodomain containing 2)	BRD2 brd2	374	22	-23.1	326
ssa-miR-29c-5p	NM_001123714.1	Proteasome subunit beta (EC 3.4.25.1)	PSB9 lmp2 lmp2a lmp2b PSMB9 psmb9 psmb9-a psmb9-b psmb9a psmb9b	295	23	-19.9	3
ssa-let-7b-3p	NM_001123715.1	Mitogen-activated protein kinase (EC 2.7.11.24)	MAPK LOC106572737 p38b	625	22	-20.2	4
ssa-miR-129-5p	NM_001123715.1	Mitogen-activated protein kinase (EC 2.7.11.24)	MAPK LOC106572737 p38b	625	21	-18.6	445
ssa-miR-29c-5p	NM_001123716.1	Myosin regulatory light chain 2-2 (myosin regulatory light chain 2, skeletal muscle isoform type 2-like)	mlc-2 LOC106606900	269	23	-20.4	6
ssa-miR-125b-3-3p	NM_001123718.1	parvalbumin beta 1	LOC100137051 PRVB1	250	22	-27.1	11
ssa-miR-29b-1-5p	NM_001123721.1	CD3gammadelta-B		387	23	-19.4	250
ssa-miR-8159-5p	NM_001123724.1	FXYD domain-containing ion transport regulator	fxyd5b	117	24	-29.5	3
ssa-miR-183-5p	NM_001123725.1	FXYD domain-containing ion transport regulator	fxyd9a PLM	478	22	-22.3	146
ssa-miR-29a-3p	NM_001123725.1	FXYD domain-containing ion transport regulator	fxyd9a PLM	478	20	-21.9	107
ssa-miR-29b-3p	NM_001123725.1	FXYD domain-containing ion transport regulator	fxyd9a PLM	478	22	-23	105
ssa-miR-29c-3p	NM_001123725.1	FXYD domain-containing ion transport regulator	fxyd9a PLM	478	22	-21.9	107
ssa-miR-29de-3p	NM_001123725.1	FXYD domain-containing ion transport regulator	fxyd9a PLM	478	20	-21.2	107
ssa-miR-novel-2-3p	NM_001123725.1	FXYD domain-containing ion transport regulator	fxyd9a PLM	478	22	-24.4	262
ssa-miR-183-5p	NM_001123726.1	FXYD domain-containing ion transport regulator	fxyd9a PLM	478	22	-22.3	146
ssa-miR-25-1-2-5p	NM_001123726.1	FXYD domain-containing ion transport regulator	fxyd9a PLM	478	23	-27.9	211
ssa-miR-29a-3p	NM_001123726.1	FXYD domain-containing ion transport regulator	fxyd9a PLM	478	20	-21.9	107
ssa-miR-29b-3p	NM_001123726.1	FXYD domain-containing ion transport regulator	fxyd9a PLM	478	22	-23	105
ssa-miR-29c-3p	NM_001123726.1	FXYD domain-containing ion transport regulator	fxyd9a PLM	478	22	-21.9	107
ssa-miR-29de-3p	NM_001123726.1	FXYD domain-containing ion transport regulator	fxyd9a PLM	478	20	-21.2	107
ssa-miR-novel-2-3p	NM_001123726.1	FXYD domain-containing ion transport regulator	fxyd9a PLM	478	22	-24.4	263
ssa-miR-129-5p	NM_001123727.1	FXYD domain-containing ion transport regulator	fxyd7	490	21	-19.5	339
ssa-miR-novel-5-3p	NM_001123727.1	FXYD domain-containing ion transport regulator	fxyd7	490	22	-21.9	273
ssa-miR-26d-5p	NM_001123730.1	FXYD domain-containing ion transport regulator		346	22	-21.1	177
ssa-miR-8162-5p	NM_001123730.1	FXYD domain-containing ion transport regulator		346	23	-26	139
ssa-miR-novel-13-5p	NM_001123730.1	FXYD domain-containing ion transport regulator		346	22	-18.8	43
ssa-let-7e-5p	NM_001126230.1	Thyrotropin receptor	fsh-R fsh-r TSHR	720	22	-18.6	320
ssa-miR-125b-3-3p	NM_001126230.1	Thyrotropin receptor	fsh-R fsh-r TSHR	720	22	-22.5	291
ssa-miR-30d-2-3p	NM_001126230.1	Thyrotropin receptor	fsh-R fsh-r TSHR	720	23	-20.1	17
ssa-miR-29b-2-5p	NM_001126231.1	Calcium polyvalent cation receptor 1 (extracellular calcium-sensing receptor isoform X1)	casr	954	25	-19.7	542
ssa-miR-731-5p	NM_001126231.1	Calcium polyvalent cation receptor 1 (extracellular calcium-sensing receptor isoform X1)	casr	954	23	-21.4	832
ssa-miR-100a-2-3p	NM_001128604.1	Proopiomelanocortin B (proopiomelanocortin B precursor)	LOC100169856	955	23	-23.8	538
ssa-miR-10b-5p	NM_001128604.1	Proopiomelanocortin B (proopiomelanocortin B precursor)	LOC100169856	955	22	-23.9	455
ssa-miR-10d-5p	NM_001128604.1	Proopiomelanocortin B (proopiomelanocortin B precursor)	LOC100169856	955	22	-24	455
ssa-miR-18c-3p	NM_001128604.1	Proopiomelanocortin B (proopiomelanocortin B precursor)	LOC100169856	955	22	-20.7	1
ssa-miR-30c-d-1-3p	NM_001136546.1	LIM/homeobox protein Lhx3 (Lim homeobox protein 3)	Lhx3 lhx3	1141	22	-20.9	205
ssa-miR-30d-2-3p	NM_001136546.1	LIM/homeobox protein Lhx3 (Lim homeobox protein 3)	Lhx3 lhx3	1141	23	-18.9	205
ssa-miR-731-5p	NM_001136546.1	LIM/homeobox protein Lhx3 (Lim homeobox protein 3)	Lhx3 lhx3	1141	23	-20.4	540
ssa-miR-novel-3-5p	NM_001136546.1	LIM/homeobox protein Lhx3 (Lim homeobox protein 3)	Lhx3 lhx3	1141	22	-20.8	362
ssa-miR-26a-3-3p	NM_001136547.1	Prop-1-like homeobox protein	LOC100192335	401	22	-23.5	126
ssa-miR-novel-5-3p	NM_001136547.1	Prop-1-like homeobox protein	LOC100192335	401	22	-21.6	235
ssa-miR-192a-5p	NM_001136548.1	Interferon regulatory factor 7	IRF7 irf7	730	21	-19.3	554
ssa-miR-30c-d-1-3p	NM_001136548.1	Interferon regulatory factor 7	IRF7 irf7	730	22	-19.8	604
ssa-miR-30d-2-3p	NM_001136548.1	Interferon regulatory factor 7	IRF7 irf7	730	23	-18.3	604
ssa-miR-459-3p	NM_001136548.1	Interferon regulatory factor 7	IRF7 irf7	730	22	-19.2	500
ssa-miR-731-5p	NM_001136548.1	Interferon regulatory factor 7	IRF7 irf7	730	23	-19.3	376
ssa-miR-192a-5p	NM_001136550.1	MAPK kinase 6c	mkk6c	730	21	-19.3	554
ssa-miR-30c-d-1-3p	NM_001136550.1	MAPK kinase 6c	mkk6c	730	22	-19.8	604
ssa-miR-30d-2-3p	NM_001136550.1	MAPK kinase 6c	mkk6c	730	23	-18.3	604
ssa-miR-459-3p	NM_001136550.1	MAPK kinase 6c	mkk6c	730	22	-19.2	500
ssa-miR-731-5p	NM_001136550.1	MAPK kinase 6c	mkk6c	730	23	-19.3	376
ssa-miR-221-5p	NM_001136552.1	Elongation of very long chain fatty acids protein 5 (EC 2.3.1.199) (3-keto acyl-CoA synthase ELOVL5) (ELOVL fatty acid elongase 5) (ELOVL FA elongase 5) (Very long chain 3-ketoacyl-CoA synthase 5) (Very long chain 3-oxoacyl-CoA synthase 5)	LOC100192340 ELOVL5	677	23	-24.2	36
ssa-miR-29b-1-5p	NM_001136552.1	Elongation of very long chain fatty acids protein 5 (EC 2.3.1.199) (3-keto acyl-CoA synthase ELOVL5) (ELOVL fatty acid elongase 5) (ELOVL FA elongase 5) (Very long chain 3-ketoacyl-CoA synthase 5) (Very long chain 3-oxoacyl-CoA synthase 5)	LOC100192340 ELOVL5	677	23	-19.4	398
ssa-miR-459-3p	NM_001136552.1	Elongation of very long chain fatty acids protein 5 (EC 2.3.1.199) (3-keto acyl-CoA synthase ELOVL5) (ELOVL fatty acid elongase 5) (ELOVL FA elongase 5) (Very long chain 3-ketoacyl-CoA synthase 5) (Very long chain 3-oxoacyl-CoA synthase 5)	LOC100192340 ELOVL5	677	22	-23.9	429
ssa-miR-100a-5p	NM_001136553.1	Elongation of very long chain fatty acids protein 2 (EC 2.3.1.199) (3-keto acyl-CoA synthase ELOVL2) (ELOVL fatty acid elongase 2) (ELOVL FA elongase 2) (Very long chain 3-ketoacyl-CoA synthase 2) (Very long chain 3-oxoacyl-CoA synthase 2)	LOC100192341 ELOVL2	737	22	-21.7	531
ssa-miR-29b-2-5p	NM_001136553.1	Elongation of very long chain fatty acids protein 2 (EC 2.3.1.199) (3-keto acyl-CoA synthase ELOVL2) (ELOVL fatty acid elongase 2) (ELOVL FA elongase 2) (Very long chain 3-ketoacyl-CoA synthase 2) (Very long chain 3-oxoacyl-CoA synthase 2)	LOC100192341 ELOVL2	737	25	-18	437
ssa-miR-30c-d-1-3p	NM_001136553.1	Elongation of very long chain fatty acids protein 2 (EC 2.3.1.199) (3-keto acyl-CoA synthase ELOVL2) (ELOVL fatty acid elongase 2) (ELOVL FA elongase 2) (Very long chain 3-ketoacyl-CoA synthase 2) (Very long chain 3-oxoacyl-CoA synthase 2)	LOC100192341 ELOVL2	737	22	-21.2	455
ssa-miR-30d-2-3p	NM_001136553.1	Elongation of very long chain fatty acids protein 2 (EC 2.3.1.199) (3-keto acyl-CoA synthase ELOVL2) (ELOVL fatty acid elongase 2) (ELOVL FA elongase 2) (Very long chain 3-ketoacyl-CoA synthase 2) (Very long chain 3-oxoacyl-CoA synthase 2)	LOC100192341 ELOVL2	737	23	-22.7	454
ssa-miR-726-3p	NM_001136553.1	Elongation of very long chain fatty acids protein 2 (EC 2.3.1.199) (3-keto acyl-CoA synthase ELOVL2) (ELOVL fatty acid elongase 2) (ELOVL FA elongase 2) (Very long chain 3-ketoacyl-CoA synthase 2) (Very long chain 3-oxoacyl-CoA synthase 2)	LOC100192341 ELOVL2	737	22	-18.1	44
ssa-miR-novel-2-3p	NM_001136553.1	Elongation of very long chain fatty acids protein 2 (EC 2.3.1.199) (3-keto acyl-CoA synthase ELOVL2) (ELOVL fatty acid elongase 2) (ELOVL FA elongase 2) (Very long chain 3-ketoacyl-CoA synthase 2) (Very long chain 3-oxoacyl-CoA synthase 2)	LOC100192341 ELOVL2	737	22	-21.9	685
ssa-miR-143-3p	NM_001139521.1	Cholecystokinin-L (Cholecystokinins) (cholecystokinin-L precursor) (cholecystokinin-like)	CCK-L cck-l CCKN LOC106605490	159	21	-18.5	5
ssa-miR-1338-5p	NM_001139524.1	Homeobox protein HoxC13aa	HoxC13aa hoxc13aa	317	21	-18.7	113
ssa-miR-1338-5p	NM_001139524.1	Homeobox protein HoxC13aa	HoxC13aa hoxc13aa	317	21	-18.7	270
ssa-miR-8159-3p	NM_001139524.1	Homeobox protein HoxC13aa	HoxC13aa hoxc13aa	317	21	-26.1	153
ssa-miR-8159-3p	NM_001139524.1	Homeobox protein HoxC13aa	HoxC13aa hoxc13aa	317	21	-22.6	2
ssa-miR-193a-5p	NM_001139527.1	Homeobox protein HoxC8aa	HoxC8aa hoxc8aa	206	21	-18.5	136
ssa-miR-29d-5p	NM_001139527.1	Homeobox protein HoxC8aa	HoxC8aa hoxc8aa	206	23	-18.6	19
ssa-miR-183-5p	NM_001139528.1	Homeobox protein HoxC6aa	HoxC6aa hoxc6aa	143	22	-20.6	19
ssa-miR-10b-5p	NM_001139530.1	Homeobox protein HoxC4aa	HoxC4aa hoxc4aa	468	22	-21.1	170
ssa-miR-10d-5p	NM_001139530.1	Homeobox protein HoxC4aa	HoxC4aa hoxc4aa	468	22	-21.2	170
ssa-miR-27a-3-5p	NM_001139530.1	Homeobox protein HoxC4aa	HoxC4aa hoxc4aa	468	24	-19.6	94
ssa-miR-27d-2-5p	NM_001139530.1	Homeobox protein HoxC4aa	HoxC4aa hoxc4aa	468	23	-24	94
ssa-miR-29b-2-5p	NM_001139530.1	Homeobox protein HoxC4aa	HoxC4aa hoxc4aa	468	25	-20.5	49
ssa-miR-2184-3p	NM_001139539.1	Homeobox protein HoxC10ba	HoxC10ba hoxc10ba	415	22	-21.9	326
ssa-miR-731-5p	NM_001139539.1	Homeobox protein HoxC10ba	HoxC10ba hoxc10ba	415	23	-21.5	310
ssa-miR-122-5p	NM_001139542.1	Homeobox protein HoxC4ba	HoxC4ba hoxc4ba	697	22	-23.3	109
ssa-miR-30c-d-1-3p	NM_001139542.1	Homeobox protein HoxC4ba	HoxC4ba hoxc4ba	697	22	-18.6	615
ssa-miR-30d-2-3p	NM_001139542.1	Homeobox protein HoxC4ba	HoxC4ba hoxc4ba	697	23	-19	615
ssa-miR-122-5p	NM_001139543.1	Homeobox protein HoxC13bb	HoxC13bb hoxc13bb	733	22	-21	71
ssa-miR-462a-3p	NM_001139543.1	Homeobox protein HoxC13bb	HoxC13bb hoxc13bb	733	22	-23.8	494
ssa-miR-21a-1-3p	NM_001139544.1	Homeobox protein HoxC12bb	HoxC12bb hoxc12bb	592	21	-20.9	55
ssa-miR-459-3p	NM_001139544.1	Homeobox protein HoxC12bb	HoxC12bb hoxc12bb	592	22	-23.9	310
ssa-miR-18c-3p	NM_001139547.1	Homeobox protein HoxC8bb	HoxC8bb hoxc8bb	1043	22	-20.9	398
ssa-miR-29a-3p	NM_001139547.1	Homeobox protein HoxC8bb	HoxC8bb hoxc8bb	1043	20	-18	858
ssa-miR-29b-3p	NM_001139547.1	Homeobox protein HoxC8bb	HoxC8bb hoxc8bb	1043	22	-18.3	855
ssa-miR-29c-3p	NM_001139547.1	Homeobox protein HoxC8bb	HoxC8bb hoxc8bb	1043	22	-18.2	835
ssa-miR-29de-3p	NM_001139547.1	Homeobox protein HoxC8bb	HoxC8bb hoxc8bb	1043	20	-19.4	836
ssa-miR-30c-d-1-3p	NM_001139547.1	Homeobox protein HoxC8bb	HoxC8bb hoxc8bb	1043	22	-23.6	932
ssa-miR-30d-2-3p	NM_001139547.1	Homeobox protein HoxC8bb	HoxC8bb hoxc8bb	1043	23	-24.2	938
ssa-miR-727b-3p	NM_001139547.1	Homeobox protein HoxC8bb	HoxC8bb hoxc8bb	1043	19	-20.8	487
ssa-miR-18b-3p	NM_001139549.1	even-skipped Homeobox 2A	Evx2a evx2a	1225	24	-26.1	221
ssa-miR-29c-5p	NM_001139550.1	Homeobox protein HoxD13aa	HoxD13aa hoxd13aa	1004	23	-18.9	760
ssa-miR-222b-5p	NM_001139551.1	Homeobox protein HoxD12aa	HoxD12aa hoxd12aa	233	22	-21.7	155
ssa-miR-30d-2-3p	NM_001139553.1	Homeobox protein HoxD10aa	HoxD10aa hoxd10aa	113	23	-18.1	58
ssa-miR-727b-3p	NM_001139553.1	Homeobox protein HoxD10aa	HoxD10aa hoxd10aa	113	19	-19.6	18
ssa-miR-7a-2-6-3p	NM_001139553.1	Homeobox protein HoxD10aa	HoxD10aa hoxd10aa	113	22	-28.8	56
ssa-miR-183-5p	NM_001139554.1	Homeobox protein HoxD3aa (homeobox protein Hox-D3 isoform X1)	HoxD3aa hoxd3 hoxd3aa	720	22	-23.3	161
ssa-miR-21a-2-3p	NM_001139555.1	Homeobox protein HoxD1aa	HoxD1aa hoxd1aa	259	22	-21.8	3
ssa-miR-21b-3p	NM_001139555.1	Homeobox protein HoxD1aa	HoxD1aa hoxd1aa	259	22	-21.5	3
ssa-miR-100a-2-3p	NM_001139558.1	Homeobox protein HoxD10ab	HoxD10ab hoxd10ab	72	23	-21	3
ssa-miR-125a-1-3p	NM_001139565.1	Homeobox protein HoxA11ab	HoxA11ab hoxa11ab	334	22	-29.7	158
ssa-miR-21a-2-3p	NM_001139565.1	Homeobox protein HoxA11ab	HoxA11ab hoxa11ab	334	22	-20.6	249
ssa-miR-21b-3p	NM_001139565.1	Homeobox protein HoxA11ab	HoxA11ab hoxa11ab	334	22	-24	247
ssa-miR-21a-1-3p	NM_001139566.1	Homeobox protein	HoxA9ab hoxa9ab	324	21	-19.3	63
ssa-miR-731-5p	NM_001139566.1	Homeobox protein	HoxA9ab hoxa9ab	324	23	-19.4	245
ssa-miR-184-3p	NM_001139571.1	Homeobox protein HoxA10b (homeobox protein Hox-A10b)	HoxA10b hoxa10b	67	22	-23.8	4
ssa-miR-181a-5-3p	NM_001139574.1	Homeobox protein HoxB8aa	HoxB8aa hoxb8aa	311	22	-21.7	107
ssa-miR-29b-1-5p	NM_001139574.1	Homeobox protein HoxB8aa	HoxB8aa hoxb8aa	311	23	-19.6	7
ssa-miR-21a-2-3p	NM_001139576.1	Homeobox protein HoxB3aa (homeobox protein HoxB3aa isoform X1)	HoxB3aa hoxb3aa	286	22	-20.3	102
ssa-miR-21b-3p	NM_001139576.1	Homeobox protein HoxB3aa (homeobox protein HoxB3aa isoform X1)	HoxB3aa hoxb3aa	286	22	-23.1	102
ssa-miR-29b-1-5p	NM_001139579.1	Homeobox protein HoxB8ab (homeobox protein HoxB8ab isoform X1)	HoxB8ab hoxb8ab	303	23	-19.5	10
ssa-miR-novel-2-3p	NM_001139579.1	Homeobox protein HoxB8ab (homeobox protein HoxB8ab isoform X1)	HoxB8ab hoxb8ab	303	22	-20.9	186
ssa-miR-7a-2-6-3p	NM_001139583.1	Homeobox protein HoxB1ab	HoxB1ab hoxb1ab	337	22	-21.1	112
ssa-miR-222b-5p	NM_001139587.1	Creatine kinase, mitochondrial 2 (creatine kinase S-type, mitochondrial) (EC 2.7.3.2)	ckmt2	480	22	-24.6	90
ssa-miR-10b-5p	NM_001139588.1	Protein phosphatase 1 regulatory (Inhibitor) subunit 7 (protein phosphatase 1 regulatory subunit 7)	ppp1r7	1199	22	-22.5	596
ssa-miR-10d-5p	NM_001139588.1	Protein phosphatase 1 regulatory (Inhibitor) subunit 7 (protein phosphatase 1 regulatory subunit 7)	ppp1r7	1199	22	-23.6	596
ssa-miR-122-5p	NM_001139588.1	Protein phosphatase 1 regulatory (Inhibitor) subunit 7 (protein phosphatase 1 regulatory subunit 7)	ppp1r7	1199	22	-24.5	132
ssa-miR-29a-3p	NM_001139588.1	Protein phosphatase 1 regulatory (Inhibitor) subunit 7 (protein phosphatase 1 regulatory subunit 7)	ppp1r7	1199	20	-24.1	582
ssa-miR-29b-3p	NM_001139588.1	Protein phosphatase 1 regulatory (Inhibitor) subunit 7 (protein phosphatase 1 regulatory subunit 7)	ppp1r7	1199	22	-25.2	580
ssa-miR-29c-3p	NM_001139588.1	Protein phosphatase 1 regulatory (Inhibitor) subunit 7 (protein phosphatase 1 regulatory subunit 7)	ppp1r7	1199	22	-25.9	580
ssa-miR-29de-3p	NM_001139588.1	Protein phosphatase 1 regulatory (Inhibitor) subunit 7 (protein phosphatase 1 regulatory subunit 7)	ppp1r7	1199	20	-24.1	582
ssa-miR-30c-d-1-3p	NM_001139588.1	Protein phosphatase 1 regulatory (Inhibitor) subunit 7 (protein phosphatase 1 regulatory subunit 7)	ppp1r7	1199	22	-21.4	1168
ssa-miR-30d-2-3p	NM_001139588.1	Protein phosphatase 1 regulatory (Inhibitor) subunit 7 (protein phosphatase 1 regulatory subunit 7)	ppp1r7	1199	23	-22.2	1168
ssa-miR-18c-3p	NM_001139589.1	Microtubule-associated protein 1 light chain 3 alpha (microtubule-associated proteins 1A/1B light chain 3A)	map1lc3a	1282	22	-21.5	1
ssa-miR-192a-5p	NM_001139589.1	Microtubule-associated protein 1 light chain 3 alpha (microtubule-associated proteins 1A/1B light chain 3A)	map1lc3a	1282	21	-19	52
ssa-miR-146a-1-2-3p	NM_001139590.1	Synapse-associated protein 1	syap1 SYAP1	481	23	-20.6	55
ssa-miR-29a-5p	NM_001139590.1	Synapse-associated protein 1	syap1 SYAP1	481	23	-24.9	49
ssa-miR-29e-5p	NM_001139590.1	Synapse-associated protein 1	syap1 SYAP1	481	23	-23.1	49
ssa-miR-192a-1-3p	NM_001139591.1	Y+L amino acid transporter 1 (Y+LAT1)-like	LOC100194505	708	22	-21.2	544
ssa-miR-192b-5p	NM_001139591.1	Y+L amino acid transporter 1 (Y+LAT1)-like	LOC100194505	708	22	-22.8	544
ssa-miR-222b-5p	NM_001139591.1	Y+L amino acid transporter 1 (Y+LAT1)-like	LOC100194505	708	22	-25.7	443
ssa-let-7b-3p	NM_001139593.1	Eukaryotic Translation initiation factor 4E type 3 (Eukaryotic translation initiation factor 4E family member 3)	eif4e3 IF4E3	1416	22	-26.2	548
ssa-let-7d-c-1-3p	NM_001139593.1	Eukaryotic Translation initiation factor 4E type 3 (Eukaryotic translation initiation factor 4E family member 3)	eif4e3 IF4E3	1416	22	-19.6	548
ssa-miR-8159-5p	NM_001139593.1	Eukaryotic Translation initiation factor 4E type 3 (Eukaryotic translation initiation factor 4E family member 3)	eif4e3 IF4E3	1416	24	-24.4	417
ssa-miR-146d-1-3p	NM_001139594.1	Ubiquitin-conjugating enzyme E2D 2 isoform 1 (ubiquitin-conjugating enzyme E2 D3) (EC 6.3.2.19)	ube2d2 UB2D2	828	22	-23	213
ssa-miR-21a-2-3p	NM_001139596.1	Casein kinase 1 gamma 2A (casein kinase 1 gamma 2a isoform X2)	csnk1g2	299	22	-20.5	127
ssa-miR-21b-3p	NM_001139596.1	Casein kinase 1 gamma 2A (casein kinase 1 gamma 2a isoform X2)	csnk1g2	299	22	-21.5	112
ssa-miR-novel-5-5p	NM_001139596.1	Casein kinase 1 gamma 2A (casein kinase 1 gamma 2a isoform X2)	csnk1g2	299	22	-18.6	234
ssa-miR-200b-5p	NM_001139597.1	Doublesex-and mab-3-related transcription factor 2b-like (doublesex and mab-3 related transcription factor 2b)	dmrt2b	309	22	-21.1	130
ssa-miR-30a-3-4-3p	NM_001139598.1	Ubiquitin-conjugating enzyme E2E 3 (ubiquitin-conjugating enzyme E2 E3) (EC 6.3.2.19) (ubiquitin-conjugating enzyme E2 E3 isoform X1)	ube2e3	484	22	-22.5	2
ssa-miR-187-5p	NM_001139599.1	Reticulon	rtn2	660	24	-24.5	583
ssa-miR-122-5p	NM_001139601.1	DNA-directed RNA polymerase III subunit	polr3gl	616	22	-25.9	60
ssa-miR-26a-3-3p	NM_001139602.1	protein LOC562437-like	LOC100194516	244	22	-26.7	24
ssa-miR-183-5p	NM_001139603.1	Synaptogyrin	LOC100194517 SNG2	1721	22	-20.1	279
ssa-miR-30c-d-1-3p	NM_001139603.1	Synaptogyrin	LOC100194517 SNG2	1721	22	-19.4	777
ssa-miR-30d-2-3p	NM_001139603.1	Synaptogyrin	LOC100194517 SNG2	1721	23	-20.3	782
ssa-miR-462a-3p	NM_001139603.1	Synaptogyrin	LOC100194517 SNG2	1721	22	-21	843
ssa-miR-462a-3p	NM_001139603.1	Synaptogyrin	LOC100194517 SNG2	1721	22	-19.2	1162
ssa-miR-727b-3p	NM_001139603.1	Synaptogyrin	LOC100194517 SNG2	1721	19	-19.1	1555
ssa-miR-727b-3p	NM_001139603.1	Synaptogyrin	LOC100194517 SNG2	1721	19	-18.6	57
ssa-miR-novel-2-3p	NM_001139603.1	Synaptogyrin	LOC100194517 SNG2	1721	22	-19.4	1120
ssa-miR-146d-1-3p	NM_001139604.1	Glutamyl-tRNA(Gln) amidotransferase subunit C, mitochondrial (Glu-AdT subunit C) (EC 6.3.5.-)	gatc GATC	471	22	-21.4	5
ssa-miR-462a-3p	NM_001139604.1	Glutamyl-tRNA(Gln) amidotransferase subunit C, mitochondrial (Glu-AdT subunit C) (EC 6.3.5.-)	gatc GATC	471	22	-19.2	99
ssa-miR-29b-2-5p	NM_001139605.1	Impact-like	LOC100194519	580	25	-21.7	471
ssa-miR-30d-2-3p	NM_001139605.1	Impact-like	LOC100194519	580	23	-19.4	117
ssa-let-7e-5p	NM_001139607.1	Heat shock cognate 70 kDa protein (Heat shock protein 8) (heat shock cognate 71 kDa protein)	hspa8 HSP70	254	22	-20.7	7
ssa-let-7f-5p	NM_001139607.1	Heat shock cognate 70 kDa protein (Heat shock protein 8) (heat shock cognate 71 kDa protein)	hspa8 HSP70	254	22	-19.1	15
ssa-miR-10b-5p	NM_001139609.1	MGC81610 protein-like	LOC100194523	1250	22	-18.5	470
ssa-miR-10d-5p	NM_001139609.1	MGC81610 protein-like	LOC100194523	1250	22	-18.6	470
ssa-miR-125b-3-3p	NM_001139609.1	MGC81610 protein-like	LOC100194523	1250	22	-22.6	850
ssa-miR-26a-3-3p	NM_001139609.1	MGC81610 protein-like	LOC100194523	1250	22	-20	1122
ssa-miR-29b-2-5p	NM_001139609.1	MGC81610 protein-like	LOC100194523	1250	25	-26	104
ssa-let-7a-1-3-3p	NM_001139610.1	small Heat shock protein-like (small heat shock protein-like isoform X1)	hspb6l	989	22	-21.9	480
ssa-let-7b-3p	NM_001139610.1	small Heat shock protein-like (small heat shock protein-like isoform X1)	hspb6l	989	22	-18.4	644
ssa-let-7d-c-1-3p	NM_001139610.1	small Heat shock protein-like (small heat shock protein-like isoform X1)	hspb6l	989	22	-21.9	644
ssa-miR-129-5p	NM_001139610.1	small Heat shock protein-like (small heat shock protein-like isoform X1)	hspb6l	989	21	-19.7	146
ssa-miR-129-5p	NM_001139610.1	small Heat shock protein-like (small heat shock protein-like isoform X1)	hspb6l	989	21	-18.2	510
ssa-miR-29d-5p	NM_001139610.1	small Heat shock protein-like (small heat shock protein-like isoform X1)	hspb6l	989	23	-24	19
ssa-miR-29d-5p	NM_001139610.1	small Heat shock protein-like (small heat shock protein-like isoform X1)	hspb6l	989	23	-18.6	728
ssa-miR-459-3p	NM_001139610.1	small Heat shock protein-like (small heat shock protein-like isoform X1)	hspb6l	989	22	-19.8	619
ssa-let-7b-3p	NM_001139612.1	V-maf musculoaponeurotic fibrosarcoma oncogene-like	maffl	1764	22	-21.3	18
ssa-let-7d-c-1-3p	NM_001139612.1	V-maf musculoaponeurotic fibrosarcoma oncogene-like	maffl	1764	22	-22.3	1626
ssa-let-7d-c-1-3p	NM_001139612.1	V-maf musculoaponeurotic fibrosarcoma oncogene-like	maffl	1764	22	-22.2	2
ssa-miR-125b-3-3p	NM_001139612.1	V-maf musculoaponeurotic fibrosarcoma oncogene-like	maffl	1764	22	-22.1	1368
ssa-miR-200b-5p	NM_001139612.1	V-maf musculoaponeurotic fibrosarcoma oncogene-like	maffl	1764	22	-21.8	1038
ssa-miR-29a-3p	NM_001139612.1	V-maf musculoaponeurotic fibrosarcoma oncogene-like	maffl	1764	20	-21.1	1370
ssa-miR-29b-3p	NM_001139612.1	V-maf musculoaponeurotic fibrosarcoma oncogene-like	maffl	1764	22	-23.1	1369
ssa-miR-29b-3p	NM_001139612.1	V-maf musculoaponeurotic fibrosarcoma oncogene-like	maffl	1764	22	-19.4	359
ssa-miR-29c-3p	NM_001139612.1	V-maf musculoaponeurotic fibrosarcoma oncogene-like	maffl	1764	22	-23.1	1369
ssa-miR-29de-3p	NM_001139612.1	V-maf musculoaponeurotic fibrosarcoma oncogene-like	maffl	1764	20	-19.4	1370
ssa-miR-462a-3p	NM_001139612.1	V-maf musculoaponeurotic fibrosarcoma oncogene-like	maffl	1764	22	-20.4	429
ssa-miR-novel-2-3p	NM_001139612.1	V-maf musculoaponeurotic fibrosarcoma oncogene-like	maffl	1764	22	-18.8	1214
ssa-let-7e-5p	NM_001139613.1	lysosome-related ORGANELLE complex-1 subunit 1	bloc1s1	1437	22	-20.2	1378
ssa-let-7f-5p	NM_001139613.1	lysosome-related ORGANELLE complex-1 subunit 1	bloc1s1	1437	22	-21.7	1386
ssa-miR-122-5p	NM_001139613.1	lysosome-related ORGANELLE complex-1 subunit 1	bloc1s1	1437	22	-18	391
ssa-miR-146d-1-3p	NM_001139613.1	lysosome-related ORGANELLE complex-1 subunit 1	bloc1s1	1437	22	-22	1243
ssa-miR-27a-3-5p	NM_001139613.1	lysosome-related ORGANELLE complex-1 subunit 1	bloc1s1	1437	24	-21.6	250
ssa-miR-27d-2-5p	NM_001139613.1	lysosome-related ORGANELLE complex-1 subunit 1	bloc1s1	1437	23	-18	253
ssa-miR-30c-d-1-3p	NM_001139613.1	lysosome-related ORGANELLE complex-1 subunit 1	bloc1s1	1437	22	-18.2	1070
ssa-miR-novel-2-3p	NM_001139613.1	lysosome-related ORGANELLE complex-1 subunit 1	bloc1s1	1437	22	-18.7	471
ssa-miR-novel-5-3p	NM_001139613.1	lysosome-related ORGANELLE complex-1 subunit 1	bloc1s1	1437	22	-19.5	1219
ssa-miR-26a-3-3p	NM_001139614.1	Myozenin 1-like	LOC100194528	723	22	-18.8	365
ssa-miR-novel-1-3p	NM_001139614.1	Myozenin 1-like	LOC100194528	723	21	-19.9	521
ssa-miR-29b-1-5p	NM_001139619.1	Eukaryotic translation initiation factor 4E-1A	eif4e1a IF4E	585	23	-18.8	142
ssa-miR-125b-3-3p	NM_001139620.1	Serine/threonine-protein phosphatase (EC 3.1.3.16)	ppp1cc	533	22	-24.6	309
ssa-miR-30c-d-1-3p	NM_001139620.1	Serine/threonine-protein phosphatase (EC 3.1.3.16)	ppp1cc	533	22	-19.7	77
ssa-miR-30d-2-3p	NM_001139620.1	Serine/threonine-protein phosphatase (EC 3.1.3.16)	ppp1cc	533	23	-21.7	77
ssa-miR-731-5p	NM_001139622.1	2-(3-amino-3-carboxypropyl)histidine synthase subunit 2 (EC 2.5.1.108)	dph2l	330	23	-18.1	189
ssa-miR-novel-5-3p	NM_001139624.1	LTV1-like	ltv1l	405	22	-24.5	146
ssa-miR-125b-3-3p	NM_001139625.1	Ubiquitin-conjugating enzyme E2 G1 (Ubiquitin-conjugating enzyme E2G 1) (EC 6.3.2.19) (ubiquitin-conjugating enzyme E2G 1 isoform X1)	ube2g1 UB2G1	1242	22	-23.3	809
ssa-miR-125b-3-3p	NM_001139625.1	Ubiquitin-conjugating enzyme E2 G1 (Ubiquitin-conjugating enzyme E2G 1) (EC 6.3.2.19) (ubiquitin-conjugating enzyme E2G 1 isoform X1)	ube2g1 UB2G1	1242	22	-21.7	1133
ssa-miR-222b-5p	NM_001139625.1	Ubiquitin-conjugating enzyme E2 G1 (Ubiquitin-conjugating enzyme E2G 1) (EC 6.3.2.19) (ubiquitin-conjugating enzyme E2G 1 isoform X1)	ube2g1 UB2G1	1242	22	-21.6	292
ssa-miR-26d-5p	NM_001139625.1	Ubiquitin-conjugating enzyme E2 G1 (Ubiquitin-conjugating enzyme E2G 1) (EC 6.3.2.19) (ubiquitin-conjugating enzyme E2G 1 isoform X1)	ube2g1 UB2G1	1242	22	-18.7	687
ssa-miR-27a-2-5p	NM_001139625.1	Ubiquitin-conjugating enzyme E2 G1 (Ubiquitin-conjugating enzyme E2G 1) (EC 6.3.2.19) (ubiquitin-conjugating enzyme E2G 1 isoform X1)	ube2g1 UB2G1	1242	25	-27.7	428
ssa-miR-27d-1-5p	NM_001139625.1	Ubiquitin-conjugating enzyme E2 G1 (Ubiquitin-conjugating enzyme E2G 1) (EC 6.3.2.19) (ubiquitin-conjugating enzyme E2G 1 isoform X1)	ube2g1 UB2G1	1242	24	-21.5	428
ssa-miR-29c-5p	NM_001139625.1	Ubiquitin-conjugating enzyme E2 G1 (Ubiquitin-conjugating enzyme E2G 1) (EC 6.3.2.19) (ubiquitin-conjugating enzyme E2G 1 isoform X1)	ube2g1 UB2G1	1242	23	-20.9	1206
ssa-miR-731-5p	NM_001139625.1	Ubiquitin-conjugating enzyme E2 G1 (Ubiquitin-conjugating enzyme E2G 1) (EC 6.3.2.19) (ubiquitin-conjugating enzyme E2G 1 isoform X1)	ube2g1 UB2G1	1242	23	-21.1	752
ssa-let-7b-3p	NM_001139626.1	Component of oligomeric golgi complex 2 (conserved oligomeric Golgi complex subunit 2)	cog2	478	22	-23	391
ssa-let-7d-c-1-3p	NM_001139626.1	Component of oligomeric golgi complex 2 (conserved oligomeric Golgi complex subunit 2)	cog2	478	22	-21.5	385
ssa-miR-18c-3p	NM_001139626.1	Component of oligomeric golgi complex 2 (conserved oligomeric Golgi complex subunit 2)	cog2	478	22	-22.3	303
ssa-miR-10b-5p	NM_001139627.1	55 kDa erythrocyte membrane protein (Membrane protein palmitoylated 1)	mpp1 EM55	481	22	-20.9	371
ssa-miR-10d-5p	NM_001139627.1	55 kDa erythrocyte membrane protein (Membrane protein palmitoylated 1)	mpp1 EM55	481	22	-22	371
ssa-miR-183-5p	NM_001139627.1	55 kDa erythrocyte membrane protein (Membrane protein palmitoylated 1)	mpp1 EM55	481	22	-25.5	254
ssa-miR-192a-1-3p	NM_001139627.1	55 kDa erythrocyte membrane protein (Membrane protein palmitoylated 1)	mpp1 EM55	481	22	-21.8	333
ssa-miR-192b-5p	NM_001139627.1	55 kDa erythrocyte membrane protein (Membrane protein palmitoylated 1)	mpp1 EM55	481	22	-21.5	333
ssa-miR-731-5p	NM_001139627.1	55 kDa erythrocyte membrane protein (Membrane protein palmitoylated 1)	mpp1 EM55	481	23	-24.4	368
ssa-let-7a-1-3-3p	NM_001139629.1	High-mobility group box 1 (high mobility group protein B1)	hmgb1	645	22	-21.7	165
ssa-miR-187-5p	NM_001139629.1	High-mobility group box 1 (high mobility group protein B1)	hmgb1	645	24	-25.7	155
ssa-miR-21a-2-3p	NM_001139629.1	High-mobility group box 1 (high mobility group protein B1)	hmgb1	645	22	-31.5	175
ssa-miR-21b-3p	NM_001139629.1	High-mobility group box 1 (high mobility group protein B1)	hmgb1	645	22	-31.2	175
ssa-miR-27a-2-5p	NM_001139629.1	High-mobility group box 1 (high mobility group protein B1)	hmgb1	645	25	-18.3	291
ssa-miR-29a-5p	NM_001139629.1	High-mobility group box 1 (high mobility group protein B1)	hmgb1	645	23	-18.6	430
ssa-miR-29e-5p	NM_001139629.1	High-mobility group box 1 (high mobility group protein B1)	hmgb1	645	23	-20.7	426
ssa-miR-21a-2-3p	NM_001139631.1	Suppressor of defective silencing 3 like (sin3 histone deacetylase corepressor complex component SDS3)	suds3 SDS3	682	22	-23	301
ssa-miR-21b-3p	NM_001139631.1	Suppressor of defective silencing 3 like (sin3 histone deacetylase corepressor complex component SDS3)	suds3 SDS3	682	22	-26.3	301
ssa-miR-462a-3p	NM_001139631.1	Suppressor of defective silencing 3 like (sin3 histone deacetylase corepressor complex component SDS3)	suds3 SDS3	682	22	-21.8	4
ssa-miR-122-5p	NM_001139632.1	DNA-damage-inducible transcript 4-like	Ddit4l ddit4l	1122	22	-19.3	724
ssa-miR-29b-2-5p	NM_001139632.1	DNA-damage-inducible transcript 4-like	Ddit4l ddit4l	1122	25	-21.1	663
ssa-miR-30c-d-1-3p	NM_001139632.1	DNA-damage-inducible transcript 4-like	Ddit4l ddit4l	1122	22	-18	1092
ssa-miR-30d-2-3p	NM_001139632.1	DNA-damage-inducible transcript 4-like	Ddit4l ddit4l	1122	23	-18.8	1092
ssa-miR-456-3p	NM_001139632.1	DNA-damage-inducible transcript 4-like	Ddit4l ddit4l	1122	22	-29.1	169
ssa-miR-8159-5p	NM_001139632.1	DNA-damage-inducible transcript 4-like	Ddit4l ddit4l	1122	24	-24.4	227
ssa-miR-29b-2-5p	NM_001139633.1	upstream transcription factor 1	usf1	675	25	-20.8	125
ssa-miR-1338-5p	NM_001139636.1	Acyl-Coenzyme A dehydrogenase C-4 to C-12 straight chain (medium-chain specific Acyl-CoA dehydrogenase, mitochondrial) (EC 1.3.8.7)	acadm ACADM	702	21	-22.7	630
ssa-miR-727b-3p	NM_001139636.1	Acyl-Coenzyme A dehydrogenase C-4 to C-12 straight chain (medium-chain specific Acyl-CoA dehydrogenase, mitochondrial) (EC 1.3.8.7)	acadm ACADM	702	19	-24.9	16
ssa-miR-129-5p	NM_001139637.1	Zinc finger matrin type 5 (Zinc finger matrin-type protein 5) (zinc finger matrin-type protein 5 isoform X1)	zmat5 ZMAT5	748	21	-18.1	720
ssa-miR-222b-5p	NM_001139637.1	Zinc finger matrin type 5 (Zinc finger matrin-type protein 5) (zinc finger matrin-type protein 5 isoform X1)	zmat5 ZMAT5	748	22	-26	293
ssa-miR-26a-3-3p	NM_001139637.1	Zinc finger matrin type 5 (Zinc finger matrin-type protein 5) (zinc finger matrin-type protein 5 isoform X1)	zmat5 ZMAT5	748	22	-19.8	696
ssa-miR-26d-5p	NM_001139637.1	Zinc finger matrin type 5 (Zinc finger matrin-type protein 5) (zinc finger matrin-type protein 5 isoform X1)	zmat5 ZMAT5	748	22	-19	497
ssa-miR-221-5p	NM_001139639.1	VHSV-induced protein-like	LOC100194553	1303	23	-21.7	82
ssa-miR-29b-1-5p	NM_001139639.1	VHSV-induced protein-like	LOC100194553	1303	23	-20.6	65
ssa-miR-29c-5p	NM_001139639.1	VHSV-induced protein-like	LOC100194553	1303	23	-19	98
ssa-miR-29d-5p	NM_001139639.1	VHSV-induced protein-like	LOC100194553	1303	23	-22	990
ssa-miR-30c-d-1-3p	NM_001139639.1	VHSV-induced protein-like	LOC100194553	1303	22	-22	328
ssa-miR-30d-2-3p	NM_001139639.1	VHSV-induced protein-like	LOC100194553	1303	23	-23	325
ssa-miR-143-3p	NM_001139640.1	Solute carrier family 25 member 3	LOC100194554	307	21	-18.1	9
ssa-miR-183-5p	NM_001139642.1	L-lactate dehydrogenase (EC 1.1.1.27)	ldha	325	22	-19.4	238
ssa-miR-8162-5p	NM_001139642.1	L-lactate dehydrogenase (EC 1.1.1.27)	ldha	325	23	-20.4	1
ssa-miR-8159-5p	NM_001139645.1	Myosin binding protein H-like	LOC100194559	447	24	-18.1	304
ssa-miR-146a-1-2-3p	NM_001139646.1	MID1 interacting G12-like protein	LOC100194560	795	23	-18.4	160
ssa-miR-146a-3-3p	NM_001139646.1	MID1 interacting G12-like protein	LOC100194560	795	22	-19	160
ssa-miR-146b-3p	NM_001139646.1	MID1 interacting G12-like protein	LOC100194560	795	22	-20.2	159
ssa-miR-459-3p	NM_001139646.1	MID1 interacting G12-like protein	LOC100194560	795	22	-25.2	15
ssa-let-7b-3p	NM_001139647.1	60S ribosomal protein L35	rpl35	43	22	-18.5	1
ssa-miR-29d-5p	NM_001139648.1	Brain protein 16	brp16	1089	23	-32.1	24
ssa-miR-8159-5p	NM_001139648.1	Brain protein 16	brp16	1089	24	-18.1	944
ssa-miR-222b-5p	NM_001139649.1	39S ribosomal protein L51, mitochondrial (mitochondrial ribosomal protein L51-like)	LOC100194563 RM51	387	22	-24	1
ssa-miR-29d-5p	NM_001139650.1	Alpha-1,4 glucan phosphorylase (EC 2.4.1.1)	pygma	1194	23	-29.8	942
ssa-let-7b-3p	NM_001139651.1	F-actin-capping protein subunit alpha	capza2 CAZA2	884	22	-19	32
ssa-miR-100a-2-3p	NM_001139653.1	Aprataxin	aptx	329	23	-18.4	228
ssa-miR-29d-5p	NM_001139653.1	Aprataxin	aptx	329	23	-22.8	71
ssa-let-7f-5p	NM_001139654.1	Ssu72 RNA polymerase II CTD phosphatase-like	ssu72l	804	22	-18.6	317
ssa-miR-29a-5p	NM_001139654.1	Ssu72 RNA polymerase II CTD phosphatase-like	ssu72l	804	23	-22.8	255
ssa-miR-29e-5p	NM_001139654.1	Ssu72 RNA polymerase II CTD phosphatase-like	ssu72l	804	23	-23	255
ssa-miR-21a-2-3p	NM_001139655.1	Limb and Neural patterns A-like (limb and neural patterns a-like isoform X1)	LOC100194569	885	22	-18.2	401
ssa-miR-21b-3p	NM_001139655.1	Limb and Neural patterns A-like (limb and neural patterns a-like isoform X1)	LOC100194569	885	22	-23.5	401
ssa-miR-26a-3-3p	NM_001139655.1	Limb and Neural patterns A-like (limb and neural patterns a-like isoform X1)	LOC100194569	885	22	-19.2	737
ssa-miR-30c-d-1-3p	NM_001139655.1	Limb and Neural patterns A-like (limb and neural patterns a-like isoform X1)	LOC100194569	885	22	-21.5	557
ssa-miR-30d-2-3p	NM_001139655.1	Limb and Neural patterns A-like (limb and neural patterns a-like isoform X1)	LOC100194569	885	23	-20.4	554
ssa-miR-26d-5p	NM_001139656.1	Enoyl Coenzyme A hydratase short chain 1 mitochondrial (Enoyl-CoA hydratase, mitochondrial) (enoyl-CoA hydratase, mitochondrial precursor) (EC 4.2.1.17)	echs1 ECHM	545	22	-23.1	60
ssa-miR-29b-2-5p	NM_001139656.1	Enoyl Coenzyme A hydratase short chain 1 mitochondrial (Enoyl-CoA hydratase, mitochondrial) (enoyl-CoA hydratase, mitochondrial precursor) (EC 4.2.1.17)	echs1 ECHM	545	25	-27.3	386
ssa-miR-100a-2-3p	NM_001139657.1	Microtubule-associated protein, RP/EB family member 1 (microtubule-associated protein RP/EB family member 1)	mapre1	2218	23	-22.6	1394
ssa-miR-122-5p	NM_001139657.1	Microtubule-associated protein, RP/EB family member 1 (microtubule-associated protein RP/EB family member 1)	mapre1	2218	22	-22.9	1070
ssa-miR-192a-1-3p	NM_001139657.1	Microtubule-associated protein, RP/EB family member 1 (microtubule-associated protein RP/EB family member 1)	mapre1	2218	22	-24.3	1844
ssa-miR-192b-5p	NM_001139657.1	Microtubule-associated protein, RP/EB family member 1 (microtubule-associated protein RP/EB family member 1)	mapre1	2218	22	-25.3	1844
ssa-miR-200b-5p	NM_001139657.1	Microtubule-associated protein, RP/EB family member 1 (microtubule-associated protein RP/EB family member 1)	mapre1	2218	22	-29.8	293
ssa-miR-27a-3-5p	NM_001139657.1	Microtubule-associated protein, RP/EB family member 1 (microtubule-associated protein RP/EB family member 1)	mapre1	2218	24	-18.2	2187
ssa-miR-29c-5p	NM_001139657.1	Microtubule-associated protein, RP/EB family member 1 (microtubule-associated protein RP/EB family member 1)	mapre1	2218	23	-18.5	1828
ssa-miR-462a-3p	NM_001139657.1	Microtubule-associated protein, RP/EB family member 1 (microtubule-associated protein RP/EB family member 1)	mapre1	2218	22	-23.3	80
ssa-miR-462a-3p	NM_001139657.1	Microtubule-associated protein, RP/EB family member 1 (microtubule-associated protein RP/EB family member 1)	mapre1	2218	22	-18	626
ssa-miR-novel-5-5p	NM_001139657.1	Microtubule-associated protein, RP/EB family member 1 (microtubule-associated protein RP/EB family member 1)	mapre1	2218	22	-22.4	1457
ssa-miR-27a-2-5p	NM_001139658.1	Phosphoglucomutase-1 (EC 5.4.2.2)	pgm1	181	25	-21.6	142
ssa-miR-27d-1-5p	NM_001139658.1	Phosphoglucomutase-1 (EC 5.4.2.2)	pgm1	181	24	-23.3	142
ssa-let-7a-1-3-3p	NM_001139659.1	Factor VIII intron 22 protein (factor 8-associated gene A)	f8a1 F8I2	316	22	-18.9	154
ssa-miR-456-3p	NM_001139661.1	ADP-ribosylarginine hydrolase	adprh	708	22	-25.5	243
ssa-miR-125b-3-3p	NM_001139662.1	Spastic paraplegia 21 (maspardin)	spg21	685	22	-27.1	258
ssa-miR-143-3p	NM_001139662.1	Spastic paraplegia 21 (maspardin)	spg21	685	21	-18.3	259
ssa-miR-146a-1-2-3p	NM_001139662.1	Spastic paraplegia 21 (maspardin)	spg21	685	23	-21.1	132
ssa-miR-146a-1-2-3p	NM_001139662.1	Spastic paraplegia 21 (maspardin)	spg21	685	23	-20.2	34
ssa-miR-146a-3-3p	NM_001139662.1	Spastic paraplegia 21 (maspardin)	spg21	685	22	-18.4	137
ssa-miR-727b-3p	NM_001139662.1	Spastic paraplegia 21 (maspardin)	spg21	685	19	-21	9
ssa-miR-7a-2-6-3p	NM_001139662.1	Spastic paraplegia 21 (maspardin)	spg21	685	22	-18.4	240
ssa-miR-187-5p	NM_001139663.1	LIM domain-binding protein 3 (LIM-domain binding factor 3)	ldb3l LDB3	333	24	-20.3	210
ssa-miR-29c-5p	NM_001139663.1	LIM domain-binding protein 3 (LIM-domain binding factor 3)	ldb3l LDB3	333	23	-19.4	38
ssa-miR-7a-2-6-3p	NM_001139663.1	LIM domain-binding protein 3 (LIM-domain binding factor 3)	ldb3l LDB3	333	22	-22.4	106
ssa-let-7a-1-3-3p	NM_001139665.1	Mammary gland protein-like	LOC100194579	772	22	-20.2	641
ssa-miR-21a-2-3p	NM_001139665.1	Mammary gland protein-like	LOC100194579	772	22	-21.9	695
ssa-miR-21a-2-3p	NM_001139665.1	Mammary gland protein-like	LOC100194579	772	22	-19.4	154
ssa-miR-21b-3p	NM_001139665.1	Mammary gland protein-like	LOC100194579	772	22	-23.1	695
ssa-miR-21b-3p	NM_001139665.1	Mammary gland protein-like	LOC100194579	772	22	-20.8	152
ssa-miR-731-5p	NM_001139666.1	Zgc:113149-like	LOC100194580	811	23	-20.2	248
ssa-miR-1338-5p	NM_001139667.1	Vacuolar protein sorting-associated protein 28 homolog	vps28 VPS28	1066	21	-21.5	591
ssa-miR-21a-2-3p	NM_001139667.1	Vacuolar protein sorting-associated protein 28 homolog	vps28 VPS28	1066	22	-24	7
ssa-miR-21a-2-3p	NM_001139667.1	Vacuolar protein sorting-associated protein 28 homolog	vps28 VPS28	1066	22	-21.7	740
ssa-miR-21b-3p	NM_001139667.1	Vacuolar protein sorting-associated protein 28 homolog	vps28 VPS28	1066	22	-25.8	11
ssa-miR-21b-3p	NM_001139667.1	Vacuolar protein sorting-associated protein 28 homolog	vps28 VPS28	1066	22	-21.7	740
ssa-miR-456-3p	NM_001139667.1	Vacuolar protein sorting-associated protein 28 homolog	vps28 VPS28	1066	22	-22.2	247
ssa-miR-459-3p	NM_001139667.1	Vacuolar protein sorting-associated protein 28 homolog	vps28 VPS28	1066	22	-19.8	886
ssa-miR-462a-3p	NM_001139667.1	Vacuolar protein sorting-associated protein 28 homolog	vps28 VPS28	1066	22	-25.5	3
ssa-miR-462a-3p	NM_001139667.1	Vacuolar protein sorting-associated protein 28 homolog	vps28 VPS28	1066	22	-22	187
ssa-miR-727b-3p	NM_001139667.1	Vacuolar protein sorting-associated protein 28 homolog	vps28 VPS28	1066	19	-21.9	56
ssa-miR-8162-5p	NM_001139667.1	Vacuolar protein sorting-associated protein 28 homolog	vps28 VPS28	1066	23	-18.1	403
ssa-miR-8158-3p	NM_001139668.1	Ubiquitin coniugating enzyme 3b (ubiquitin-conjugating enzyme E2 R2) (EC 6.3.2.19)	ube2r2	204	23	-20.3	166
ssa-let-7b-3p	NM_001139669.1	Peptidylprolyl isomerase (EC 5.2.1.8)	fkbp1b	407	22	-21.1	321
ssa-let-7d-c-1-3p	NM_001139669.1	Peptidylprolyl isomerase (EC 5.2.1.8)	fkbp1b	407	22	-19.4	322
ssa-let-7d-c-1-3p	NM_001139670.1	Proteasome (Prosome, macropain) inhibitor subunit 1 (proteasome inhibitor PI31 subunit)	psmf1	845	22	-19.7	470
ssa-miR-27a-3-5p	NM_001139670.1	Proteasome (Prosome, macropain) inhibitor subunit 1 (proteasome inhibitor PI31 subunit)	psmf1	845	24	-22.3	793
ssa-miR-27d-2-5p	NM_001139670.1	Proteasome (Prosome, macropain) inhibitor subunit 1 (proteasome inhibitor PI31 subunit)	psmf1	845	23	-22.5	793
ssa-let-7a-1-3-3p	NM_001139671.1	Pre-B-cell leukemia transcription factor 2	pbx2	571	22	-19.2	492
ssa-let-7e-5p	NM_001139671.1	Pre-B-cell leukemia transcription factor 2	pbx2	571	22	-21.6	526
ssa-let-7f-5p	NM_001139671.1	Pre-B-cell leukemia transcription factor 2	pbx2	571	22	-22.2	518
ssa-miR-30c-d-1-3p	NM_001139671.1	Pre-B-cell leukemia transcription factor 2	pbx2	571	22	-20.4	40
ssa-miR-30d-2-3p	NM_001139671.1	Pre-B-cell leukemia transcription factor 2	pbx2	571	23	-18.9	37
ssa-miR-8159-5p	NM_001139671.1	Pre-B-cell leukemia transcription factor 2	pbx2	571	24	-18.1	185
ssa-miR-183-5p	NM_001139673.1	protein phosphatase 1, regulatory (Inhibitor) subunit 1b-like (protein phosphatase 1, regulatory (Inhibitor) subunit 1b-like isoform X1)	LOC100194587	1791	22	-24.1	1641
ssa-miR-18b-3p	NM_001139673.1	protein phosphatase 1, regulatory (Inhibitor) subunit 1b-like (protein phosphatase 1, regulatory (Inhibitor) subunit 1b-like isoform X1)	LOC100194587	1791	24	-23.6	285
ssa-miR-29b-3-5p	NM_001139673.1	protein phosphatase 1, regulatory (Inhibitor) subunit 1b-like (protein phosphatase 1, regulatory (Inhibitor) subunit 1b-like isoform X1)	LOC100194587	1791	23	-19.7	180
ssa-miR-29d-5p	NM_001139673.1	protein phosphatase 1, regulatory (Inhibitor) subunit 1b-like (protein phosphatase 1, regulatory (Inhibitor) subunit 1b-like isoform X1)	LOC100194587	1791	23	-27.6	341
ssa-miR-727b-3p	NM_001139673.1	protein phosphatase 1, regulatory (Inhibitor) subunit 1b-like (protein phosphatase 1, regulatory (Inhibitor) subunit 1b-like isoform X1)	LOC100194587	1791	19	-21.2	1599
ssa-miR-8162-5p	NM_001139673.1	protein phosphatase 1, regulatory (Inhibitor) subunit 1b-like (protein phosphatase 1, regulatory (Inhibitor) subunit 1b-like isoform X1)	LOC100194587	1791	23	-29.4	1537
ssa-miR-129-5p	NM_001139674.1	LSM12 homolog A (Lsm12) (protein LSM12 homolog A)	lsm12 LS12A	761	21	-18.9	725
ssa-miR-143-3p	NM_001139674.1	LSM12 homolog A (Lsm12) (protein LSM12 homolog A)	lsm12 LS12A	761	21	-22.1	280
ssa-miR-18c-3p	NM_001139674.1	LSM12 homolog A (Lsm12) (protein LSM12 homolog A)	lsm12 LS12A	761	22	-24.8	4
ssa-miR-122-5p	NM_001139676.1	Cold-inducible RNA-binding protein (Hyperosmotic glycine rich protein-like)	cirbp CIRBP	363	22	-20.9	66
ssa-miR-21a-2-3p	NM_001139676.1	Cold-inducible RNA-binding protein (Hyperosmotic glycine rich protein-like)	cirbp CIRBP	363	22	-18.1	305
ssa-miR-novel-3-5p	NM_001139676.1	Cold-inducible RNA-binding protein (Hyperosmotic glycine rich protein-like)	cirbp CIRBP	363	22	-22.7	270
ssa-miR-26d-5p	NM_001139677.1	Nucleoside diphosphate kinase (EC 2.7.4.6)	nme1	187	22	-27.7	130
ssa-let-7e-5p	NM_001139679.1	5'-nucleotidase (EC 3.1.3.5)	nt5c3 5NT3L	1449	22	-21.6	1234
ssa-let-7f-5p	NM_001139679.1	5'-nucleotidase (EC 3.1.3.5)	nt5c3 5NT3L	1449	22	-19.7	1232
ssa-miR-100a-2-3p	NM_001139679.1	5'-nucleotidase (EC 3.1.3.5)	nt5c3 5NT3L	1449	23	-20.4	1250
ssa-miR-1338-5p	NM_001139679.1	5'-nucleotidase (EC 3.1.3.5)	nt5c3 5NT3L	1449	21	-24.3	460
ssa-miR-146d-1-3p	NM_001139679.1	5'-nucleotidase (EC 3.1.3.5)	nt5c3 5NT3L	1449	22	-27.8	126
ssa-miR-183-5p	NM_001139679.1	5'-nucleotidase (EC 3.1.3.5)	nt5c3 5NT3L	1449	22	-18.8	748
ssa-miR-8159-5p	NM_001139679.1	5'-nucleotidase (EC 3.1.3.5)	nt5c3 5NT3L	1449	24	-20.4	65
ssa-miR-25-1-2-5p	NM_001139680.1	Thioredoxin-like 1 (thioredoxin-like protein 1)	txnl1	405	23	-26.2	269
ssa-miR-459-3p	NM_001139680.1	Thioredoxin-like 1 (thioredoxin-like protein 1)	txnl1	405	22	-19.8	143
ssa-let-7b-3p	NM_001139683.1	Protein arginine methyltransferase 1 (protein arginine N-methyltransferase 1) (EC 2.1.1.125)	prmt1	1214	22	-21.6	354
ssa-let-7d-c-1-3p	NM_001139683.1	Protein arginine methyltransferase 1 (protein arginine N-methyltransferase 1) (EC 2.1.1.125)	prmt1	1214	22	-19.1	354
ssa-miR-125b-3-3p	NM_001139683.1	Protein arginine methyltransferase 1 (protein arginine N-methyltransferase 1) (EC 2.1.1.125)	prmt1	1214	22	-25.5	310
ssa-miR-193a-5p	NM_001139683.1	Protein arginine methyltransferase 1 (protein arginine N-methyltransferase 1) (EC 2.1.1.125)	prmt1	1214	21	-26.8	833
ssa-miR-21a-2-3p	NM_001139683.1	Protein arginine methyltransferase 1 (protein arginine N-methyltransferase 1) (EC 2.1.1.125)	prmt1	1214	22	-19.2	860
ssa-miR-21b-3p	NM_001139683.1	Protein arginine methyltransferase 1 (protein arginine N-methyltransferase 1) (EC 2.1.1.125)	prmt1	1214	22	-21.2	860
ssa-miR-30c-d-1-3p	NM_001139683.1	Protein arginine methyltransferase 1 (protein arginine N-methyltransferase 1) (EC 2.1.1.125)	prmt1	1214	22	-19.8	227
ssa-miR-30d-2-3p	NM_001139683.1	Protein arginine methyltransferase 1 (protein arginine N-methyltransferase 1) (EC 2.1.1.125)	prmt1	1214	23	-19.9	219
ssa-miR-462a-3p	NM_001139683.1	Protein arginine methyltransferase 1 (protein arginine N-methyltransferase 1) (EC 2.1.1.125)	prmt1	1214	22	-22.1	662
ssa-miR-727b-3p	NM_001139683.1	Protein arginine methyltransferase 1 (protein arginine N-methyltransferase 1) (EC 2.1.1.125)	prmt1	1214	19	-20	527
ssa-miR-100a-5p	NM_001139684.1	N-acetyltransferase 9-like	LOC100194599	840	22	-23.9	153
ssa-miR-459-3p	NM_001139684.1	N-acetyltransferase 9-like	LOC100194599	840	22	-30.1	501
ssa-miR-187-5p	NM_001139685.1	Betaine-homocysteine methyltransferase (betaine--homocysteine S-methyltransferase 1) (EC 2.1.1.5)	bhmt	682	24	-22.3	213
ssa-miR-459-3p	NM_001139685.1	Betaine-homocysteine methyltransferase (betaine--homocysteine S-methyltransferase 1) (EC 2.1.1.5)	bhmt	682	22	-18.9	109
ssa-miR-26d-5p	NM_001139686.1	Tubulin alpha chain	tuba8l2 LOC106575781 TBA	549	22	-19.5	37
ssa-miR-29d-5p	NM_001139686.1	Tubulin alpha chain	tuba8l2 LOC106575781 TBA	549	23	-19.7	187
ssa-miR-27a-2-5p	NM_001139687.1	ATP synthase subunit d, mitochondrial	atp5h ATP5H	192	25	-21.9	68
ssa-miR-27d-1-5p	NM_001139687.1	ATP synthase subunit d, mitochondrial	atp5h ATP5H	192	24	-21.6	58
ssa-miR-125a-2-3-3p	NM_001139688.1	C6orf72 homolog (Si:dkey-15j16.2-like) (si:dkey-15j16.2-like precursor)	LOC100194603 CF072	776	22	-26.5	297
ssa-miR-125a-4-3p	NM_001139688.1	C6orf72 homolog (Si:dkey-15j16.2-like) (si:dkey-15j16.2-like precursor)	LOC100194603 CF072	776	22	-26	291
ssa-miR-222b-5p	NM_001139688.1	C6orf72 homolog (Si:dkey-15j16.2-like) (si:dkey-15j16.2-like precursor)	LOC100194603 CF072	776	22	-22	674
ssa-miR-29a-5p	NM_001139688.1	C6orf72 homolog (Si:dkey-15j16.2-like) (si:dkey-15j16.2-like precursor)	LOC100194603 CF072	776	23	-23.3	38
ssa-miR-29e-5p	NM_001139688.1	C6orf72 homolog (Si:dkey-15j16.2-like) (si:dkey-15j16.2-like precursor)	LOC100194603 CF072	776	23	-21	38
ssa-miR-novel-1-3p	NM_001139688.1	C6orf72 homolog (Si:dkey-15j16.2-like) (si:dkey-15j16.2-like precursor)	LOC100194603 CF072	776	21	-22.4	340
ssa-miR-novel-2-3p	NM_001139688.1	C6orf72 homolog (Si:dkey-15j16.2-like) (si:dkey-15j16.2-like precursor)	LOC100194603 CF072	776	22	-20.2	546
ssa-miR-novel-5-3p	NM_001139688.1	C6orf72 homolog (Si:dkey-15j16.2-like) (si:dkey-15j16.2-like precursor)	LOC100194603 CF072	776	22	-21.2	273
ssa-miR-novel-5-5p	NM_001139688.1	C6orf72 homolog (Si:dkey-15j16.2-like) (si:dkey-15j16.2-like precursor)	LOC100194603 CF072	776	22	-21.4	257
ssa-miR-731-5p	NM_001139689.1	small Ubiquitin-related modifier 1	SUMO1 sumo1	427	23	-19.6	191
ssa-miR-125b-3-3p	NM_001139694.1	Protein-serine/threonine kinase (EC 2.7.11.-)	pdk3	872	22	-26.3	31
ssa-miR-129-5p	NM_001139694.1	Protein-serine/threonine kinase (EC 2.7.11.-)	pdk3	872	21	-21	836
ssa-miR-146d-1-3p	NM_001139694.1	Protein-serine/threonine kinase (EC 2.7.11.-)	pdk3	872	22	-19.2	226
ssa-miR-192a-5p	NM_001139694.1	Protein-serine/threonine kinase (EC 2.7.11.-)	pdk3	872	21	-26.8	25
ssa-miR-30c-d-1-3p	NM_001139694.1	Protein-serine/threonine kinase (EC 2.7.11.-)	pdk3	872	22	-25.3	107
ssa-miR-30d-2-3p	NM_001139694.1	Protein-serine/threonine kinase (EC 2.7.11.-)	pdk3	872	23	-25.4	107
ssa-miR-8162-5p	NM_001139694.1	Protein-serine/threonine kinase (EC 2.7.11.-)	pdk3	872	23	-18.7	619
ssa-miR-122-5p	NM_001139695.1	Parvalbumin-2	pvalb2	250	22	-22.3	114
ssa-let-7a-1-3-3p	NM_001139697.1	40S ribosomal protein S30	fau UBIM	112	22	-20.6	64
ssa-miR-122-5p	NM_001139701.1	Cofilin 2	cf12	919	22	-20.2	267
ssa-miR-129-5p	NM_001139701.1	Cofilin 2	cf12	919	21	-18.8	584
ssa-miR-183-5p	NM_001139701.1	Cofilin 2	cf12	919	22	-22	1
ssa-miR-2184-3p	NM_001139701.1	Cofilin 2	cf12	919	22	-21.1	1
ssa-miR-novel-13-5p	NM_001139701.1	Cofilin 2	cf12	919	22	-18.8	586
ssa-miR-26d-5p	NM_001139702.1	Triosephosphate isomerase (EC 5.3.1.1)	tpi1b TPIS	575	22	-18.9	324
ssa-miR-novel-13-5p	NM_001139702.1	Triosephosphate isomerase (EC 5.3.1.1)	tpi1b TPIS	575	22	-20.4	472
ssa-miR-novel-2-3p	NM_001139702.1	Triosephosphate isomerase (EC 5.3.1.1)	tpi1b TPIS	575	22	-21.6	35
ssa-miR-100a-2-3p	NM_001139705.1	Adenylosuccinate synthetase isozyme 1 (AMPSase 1) (AdSS 1) (EC 6.3.4.4) (Adenylosuccinate synthetase, basic isozyme) (Adenylosuccinate synthetase, muscle isozyme) (M-type adenylosuccinate synthetase) (IMP--aspartate ligase 1)	adssl1 ADSS1 adss1b ADSSL1 adssl1b	1212	23	-19.8	823
ssa-miR-21b-3p	NM_001139705.1	Adenylosuccinate synthetase isozyme 1 (AMPSase 1) (AdSS 1) (EC 6.3.4.4) (Adenylosuccinate synthetase, basic isozyme) (Adenylosuccinate synthetase, muscle isozyme) (M-type adenylosuccinate synthetase) (IMP--aspartate ligase 1)	adssl1 ADSS1 adss1b ADSSL1 adssl1b	1212	22	-18.2	894
ssa-miR-7a-2-6-3p	NM_001139705.1	Adenylosuccinate synthetase isozyme 1 (AMPSase 1) (AdSS 1) (EC 6.3.4.4) (Adenylosuccinate synthetase, basic isozyme) (Adenylosuccinate synthetase, muscle isozyme) (M-type adenylosuccinate synthetase) (IMP--aspartate ligase 1)	adssl1 ADSS1 adss1b ADSSL1 adssl1b	1212	22	-21.7	239
ssa-miR-8162-5p	NM_001139705.1	Adenylosuccinate synthetase isozyme 1 (AMPSase 1) (AdSS 1) (EC 6.3.4.4) (Adenylosuccinate synthetase, basic isozyme) (Adenylosuccinate synthetase, muscle isozyme) (M-type adenylosuccinate synthetase) (IMP--aspartate ligase 1)	adssl1 ADSS1 adss1b ADSSL1 adssl1b	1212	23	-24.2	138
ssa-miR-novel-5-3p	NM_001139705.1	Adenylosuccinate synthetase isozyme 1 (AMPSase 1) (AdSS 1) (EC 6.3.4.4) (Adenylosuccinate synthetase, basic isozyme) (Adenylosuccinate synthetase, muscle isozyme) (M-type adenylosuccinate synthetase) (IMP--aspartate ligase 1)	adssl1 ADSS1 adss1b ADSSL1 adssl1b	1212	22	-21	332
ssa-miR-27a-2-5p	NM_001139706.1	Adenylosuccinate synthetase isozyme 1 (AMPSase 1) (AdSS 1) (EC 6.3.4.4) (Adenylosuccinate synthetase, basic isozyme) (Adenylosuccinate synthetase, muscle isozyme) (M-type adenylosuccinate synthetase) (IMP--aspartate ligase 1)	adssl2 ADSS1 adss1c ADSSL1 adssl1c PURA1	601	25	-20.5	199
ssa-miR-27d-1-5p	NM_001139706.1	Adenylosuccinate synthetase isozyme 1 (AMPSase 1) (AdSS 1) (EC 6.3.4.4) (Adenylosuccinate synthetase, basic isozyme) (Adenylosuccinate synthetase, muscle isozyme) (M-type adenylosuccinate synthetase) (IMP--aspartate ligase 1)	adssl2 ADSS1 adss1c ADSSL1 adssl1c PURA1	601	24	-19.3	199
ssa-miR-727b-3p	NM_001139706.1	Adenylosuccinate synthetase isozyme 1 (AMPSase 1) (AdSS 1) (EC 6.3.4.4) (Adenylosuccinate synthetase, basic isozyme) (Adenylosuccinate synthetase, muscle isozyme) (M-type adenylosuccinate synthetase) (IMP--aspartate ligase 1)	adssl2 ADSS1 adss1c ADSSL1 adssl1c PURA1	601	19	-22.6	1
ssa-miR-183-5p	NM_001139708.1	Fructose-bisphosphate aldolase (EC 4.1.2.13)	LOC100194623	364	22	-20	47
ssa-miR-183-5p	NM_001139709.1	Fructose-bisphosphate aldolase A (EC 4.1.2.13) (Muscle-type aldolase) (allergen Sal s 3.0101)	LOC100194624	401	22	-19	76
ssa-miR-29b-1-5p	NM_001139711.1	ATP synthase lipid-binding protein, mitochondrial (ATP synthase, H+ transporting, mitochondrial F0 complex, subunit c-3 isoform X1)	atp5g3 AT5G3	760	23	-18.8	285
ssa-miR-29b-2-5p	NM_001139711.1	ATP synthase lipid-binding protein, mitochondrial (ATP synthase, H+ transporting, mitochondrial F0 complex, subunit c-3 isoform X1)	atp5g3 AT5G3	760	25	-22.4	285
ssa-miR-731-5p	NM_001139711.1	ATP synthase lipid-binding protein, mitochondrial (ATP synthase, H+ transporting, mitochondrial F0 complex, subunit c-3 isoform X1)	atp5g3 AT5G3	760	23	-18.6	68
ssa-miR-8159-5p	NM_001139712.1	ATP synthase lipid-binding protein, mitochondrial (ATP synthase, H+ transporting, mitochondrial F0 complex, subunit c-3 isoform X1)	atp5g3 AT5G3	277	24	-25.7	185
ssa-miR-8159-5p	NM_001139712.1	ATP synthase lipid-binding protein, mitochondrial (ATP synthase, H+ transporting, mitochondrial F0 complex, subunit c-3 isoform X1)	atp5g3 AT5G3	277	24	-21.9	136
ssa-let-7b-3p	NM_001139713.1	Transcription factor BTF3	btf3 BTF3 LOC100194627	608	22	-27.8	160
ssa-let-7b-3p	NM_001139713.1	Transcription factor BTF3	btf3 BTF3 LOC100194627	608	22	-18.5	1
ssa-let-7d-c-1-3p	NM_001139713.1	Transcription factor BTF3	btf3 BTF3 LOC100194627	608	22	-22.7	160
ssa-miR-187-5p	NM_001139714.1	Calmodulin 2 (Phosphorylase kinase, delta)-1	CALM calm calm1 calm2 Calmodulin LOC100194628 LOC100194629 LOC106563500 LOC106601272 LOC106603160 LOC106605143 LOC106608223 LOC106612378	1003	24	-24.8	865
ssa-miR-122-5p	NM_001139715.1	Creatine kinase-1	ckm1	360	22	-20.9	80
ssa-miR-183-5p	NM_001139715.1	Creatine kinase-1	ckm1	360	22	-21.3	225
ssa-miR-novel-5-3p	NM_001139715.1	Creatine kinase-1	ckm1	360	22	-19.3	24
ssa-miR-183-5p	NM_001139716.1	Creatine kinase-2	ckm2	351	22	-19.4	28
ssa-miR-192a-1-3p	NM_001139716.1	Creatine kinase-2	ckm2	351	22	-22	235
ssa-miR-192b-5p	NM_001139716.1	Creatine kinase-2	ckm2	351	22	-22	235
ssa-miR-187-5p	NM_001139717.1	endothelial differentiation-related factor 1-1	LOC100194632	527	24	-26.9	403
ssa-miR-29b-1-5p	NM_001139717.1	endothelial differentiation-related factor 1-1	LOC100194632	527	23	-18.2	1
ssa-miR-30a-3-4-3p	NM_001139717.1	endothelial differentiation-related factor 1-1	LOC100194632	527	22	-23.4	47
ssa-let-7d-c-1-3p	NM_001139719.1	Eukaryotic Translation initiation factor 4E binding protein 3-1 (Eukaryotic translation initiation factor 4E-1A-binding protein)	4EBP 4ebp	589	22	-18.5	265
ssa-miR-novel-13-5p	NM_001139720.1	Eukaryotic Translation initiation factor 4E binding protein 3-2 (Eukaryotic translation initiation factor 4E-1A-binding protein)	4EBP 4ebp	572	22	-25.8	359
ssa-miR-122-5p	NM_001139723.1	Transcription initiation factor IIE subunit beta	LOC100194638 LOC106592956	1206	22	-21.3	698
ssa-miR-129-5p	NM_001139723.1	Transcription initiation factor IIE subunit beta	LOC100194638 LOC106592956	1206	21	-19.6	386
ssa-miR-146a-1-2-3p	NM_001139723.1	Transcription initiation factor IIE subunit beta	LOC100194638 LOC106592956	1206	23	-23	837
ssa-miR-222b-5p	NM_001139723.1	Transcription initiation factor IIE subunit beta	LOC100194638 LOC106592956	1206	22	-24.3	1104
ssa-miR-27a-2-5p	NM_001139723.1	Transcription initiation factor IIE subunit beta	LOC100194638 LOC106592956	1206	25	-19.9	277
ssa-miR-29a-5p	NM_001139723.1	Transcription initiation factor IIE subunit beta	LOC100194638 LOC106592956	1206	23	-20.4	817
ssa-miR-29e-5p	NM_001139723.1	Transcription initiation factor IIE subunit beta	LOC100194638 LOC106592956	1206	23	-19.5	811
ssa-miR-456-3p	NM_001139723.1	Transcription initiation factor IIE subunit beta	LOC100194638 LOC106592956	1206	22	-22.4	478
ssa-miR-459-3p	NM_001139723.1	Transcription initiation factor IIE subunit beta	LOC100194638 LOC106592956	1206	22	-24.7	437
ssa-miR-8162-5p	NM_001139723.1	Transcription initiation factor IIE subunit beta	LOC100194638 LOC106592956	1206	23	-21.1	245
ssa-miR-novel-2-3p	NM_001139723.1	Transcription initiation factor IIE subunit beta	LOC100194638 LOC106592956	1206	22	-24.5	828
ssa-miR-192a-5p	NM_001139725.1	Isocitrate dehydrogenase [NADP] (EC 1.1.1.42)	LOC100194640	371	21	-18.5	39
ssa-miR-183-5p	NM_001139727.1	Myosin, light polypeptide 3-1	LOC100194642	741	22	-19.3	590
ssa-miR-21a-2-3p	NM_001139727.1	Myosin, light polypeptide 3-1	LOC100194642	741	22	-20.9	251
ssa-miR-21b-3p	NM_001139727.1	Myosin, light polypeptide 3-1	LOC100194642	741	22	-24	247
ssa-miR-462a-3p	NM_001139727.1	Myosin, light polypeptide 3-1	LOC100194642	741	22	-22.4	48
ssa-miR-727b-3p	NM_001139728.1	Myosin, light polypeptide 3-3	LOC100194643	438	19	-25.5	154
ssa-miR-1338-5p	NM_001139729.1	Phosphoglycerate mutase (EC 5.4.2.11) (EC 5.4.2.4)	LOC100194644	209	21	-19.8	102
ssa-miR-456-3p	NM_001139729.1	Phosphoglycerate mutase (EC 5.4.2.11) (EC 5.4.2.4)	LOC100194644	209	22	-22.3	1
ssa-miR-125b-3-3p	NM_001139730.1	Phosphoglycerate mutase (EC 5.4.2.11) (EC 5.4.2.4)	LOC100194645	371	22	-22.5	78
ssa-miR-1338-5p	NM_001139730.1	Phosphoglycerate mutase (EC 5.4.2.11) (EC 5.4.2.4)	LOC100194645	371	21	-21	267
ssa-miR-29e-5p	NM_001139730.1	Phosphoglycerate mutase (EC 5.4.2.11) (EC 5.4.2.4)	LOC100194645	371	23	-18.4	329
ssa-miR-462a-3p	NM_001139731.1	Proteasome (Prosome, macropain) 26S subunit, non-ATPase, 13	LOC100194646	481	22	-24.5	314
ssa-miR-727b-3p	NM_001139731.1	Proteasome (Prosome, macropain) 26S subunit, non-ATPase, 13	LOC100194646	481	19	-24.5	159
ssa-miR-21a-2-3p	NM_001139739.1	ADP/ATP translocase 1 (Solute carrier family 25-2)	slc25a4 LOC100194655	460	22	-19.7	359
ssa-miR-21b-3p	NM_001139739.1	ADP/ATP translocase 1 (Solute carrier family 25-2)	slc25a4 LOC100194655	460	22	-20.7	365
ssa-miR-462a-3p	NM_001139739.1	ADP/ATP translocase 1 (Solute carrier family 25-2)	slc25a4 LOC100194655	460	22	-25.9	199
ssa-miR-novel-13-5p	NM_001139739.1	ADP/ATP translocase 1 (Solute carrier family 25-2)	slc25a4 LOC100194655	460	22	-20.7	138
ssa-miR-29a-3p	NM_001139740.1	Transmembrane protein 38A-1	LOC100194656	649	20	-25.5	168
ssa-miR-29b-3p	NM_001139740.1	Transmembrane protein 38A-1	LOC100194656	649	22	-25	163
ssa-miR-29c-3p	NM_001139740.1	Transmembrane protein 38A-1	LOC100194656	649	22	-25.6	168
ssa-miR-29de-3p	NM_001139740.1	Transmembrane protein 38A-1	LOC100194656	649	20	-22	168
ssa-miR-456-3p	NM_001139740.1	Transmembrane protein 38A-1	LOC100194656	649	22	-25.2	59
ssa-miR-727b-3p	NM_001139740.1	Transmembrane protein 38A-1	LOC100194656	649	19	-19.7	34
ssa-miR-26d-5p	NM_001139741.1	Transmembrane protein 38A-2	LOC100194657	624	22	-18.4	345
ssa-miR-29a-3p	NM_001139741.1	Transmembrane protein 38A-2	LOC100194657	624	20	-21.2	167
ssa-miR-29b-3p	NM_001139741.1	Transmembrane protein 38A-2	LOC100194657	624	22	-22.1	157
ssa-miR-29c-3p	NM_001139741.1	Transmembrane protein 38A-2	LOC100194657	624	22	-21.3	167
ssa-miR-29de-3p	NM_001139741.1	Transmembrane protein 38A-2	LOC100194657	624	20	-19	167
ssa-miR-456-3p	NM_001139741.1	Transmembrane protein 38A-2	LOC100194657	624	22	-23	64
ssa-miR-100a-2-3p	NM_001139744.1	Y-box binding protein-2	LOC100194660	375	23	-20.3	86
ssa-miR-192a-1-3p	NM_001139745.1	Zinc finger protein 9-1		898	22	-28.3	77
ssa-miR-192b-5p	NM_001139745.1	Zinc finger protein 9-1		898	22	-28.3	77
ssa-miR-21a-2-3p	NM_001139746.1	Myosin light chain 1-1	LOC100194662	512	22	-20	236
ssa-miR-21b-3p	NM_001139746.1	Myosin light chain 1-1	LOC100194662	512	22	-23.5	236
ssa-miR-1338-5p	NM_001139747.1	Myosin light chain 1-3	LOC100194663	281	21	-26.7	40
ssa-miR-143-3p	NM_001139747.1	Myosin light chain 1-3	LOC100194663	281	21	-22.5	81
ssa-miR-2184-3p	NM_001139747.1	Myosin light chain 1-3	LOC100194663	281	22	-25.8	96
ssa-miR-29c-5p	NM_001139748.1	Vps20-associated 1 like 1	LOC100194664	635	23	-18.6	257
ssa-miR-18b-3p	NM_001139749.1	26S proteasome non-ATPase regulatory subunit 7 like 1	LOC100194665	477	24	-26.9	241
ssa-miR-731-5p	NM_001139749.1	26S proteasome non-ATPase regulatory subunit 7 like 1	LOC100194665	477	23	-25.4	114
ssa-miR-192a-5p	NM_001139751.1	Annexin	anxa6	636	21	-22.6	542
ssa-miR-8162-5p	NM_001139752.1	EEF1A2 binding protein-like	LOC100194677	375	23	-22.6	159
ssa-miR-30c-d-1-3p	NM_001139753.1	uncharacterized protein LOC100194694	LOC100194694	530	22	-20	459
ssa-miR-30d-2-3p	NM_001139753.1	uncharacterized protein LOC100194694	LOC100194694	530	23	-22.9	458
ssa-let-7a-1-3-3p	NM_001139754.1	uncharacterized protein LOC100194698 (uncharacterized protein LOC100194698 isoform X2)	LOC100194698	1226	22	-21.6	294
ssa-miR-18b-3p	NM_001139754.1	uncharacterized protein LOC100194698 (uncharacterized protein LOC100194698 isoform X2)	LOC100194698	1226	24	-31.7	318
ssa-miR-18c-3p	NM_001139754.1	uncharacterized protein LOC100194698 (uncharacterized protein LOC100194698 isoform X2)	LOC100194698	1226	22	-24	322
ssa-miR-222b-5p	NM_001139754.1	uncharacterized protein LOC100194698 (uncharacterized protein LOC100194698 isoform X2)	LOC100194698	1226	22	-21.7	1070
ssa-miR-100a-2-3p	NM_001139755.1	Thiamine triphosphatase-like (Thiamine-triphosphatase) (EC 3.6.1.28)	THTPA thtpa	1679	23	-21.1	544
ssa-miR-125b-3-3p	NM_001139755.1	Thiamine triphosphatase-like (Thiamine-triphosphatase) (EC 3.6.1.28)	THTPA thtpa	1679	22	-19.1	1334
ssa-miR-129-5p	NM_001139755.1	Thiamine triphosphatase-like (Thiamine-triphosphatase) (EC 3.6.1.28)	THTPA thtpa	1679	21	-18.3	1535
ssa-miR-143-3p	NM_001139755.1	Thiamine triphosphatase-like (Thiamine-triphosphatase) (EC 3.6.1.28)	THTPA thtpa	1679	21	-26.3	282
ssa-miR-183-5p	NM_001139755.1	Thiamine triphosphatase-like (Thiamine-triphosphatase) (EC 3.6.1.28)	THTPA thtpa	1679	22	-18.6	789
ssa-miR-192a-1-3p	NM_001139755.1	Thiamine triphosphatase-like (Thiamine-triphosphatase) (EC 3.6.1.28)	THTPA thtpa	1679	22	-29.2	228
ssa-miR-192b-5p	NM_001139755.1	Thiamine triphosphatase-like (Thiamine-triphosphatase) (EC 3.6.1.28)	THTPA thtpa	1679	22	-31	228
ssa-miR-222b-5p	NM_001139755.1	Thiamine triphosphatase-like (Thiamine-triphosphatase) (EC 3.6.1.28)	THTPA thtpa	1679	22	-18.4	177
ssa-miR-29a-3p	NM_001139756.1	transposase-like	LOC100194703	1555	20	-21.1	192
ssa-miR-29b-3p	NM_001139756.1	transposase-like	LOC100194703	1555	22	-22.6	187
ssa-miR-29c-3p	NM_001139756.1	transposase-like	LOC100194703	1555	22	-22	182
ssa-miR-29de-3p	NM_001139756.1	transposase-like	LOC100194703	1555	20	-19.8	183
ssa-miR-122-5p	NM_001139757.1	uncharacterized protein LOC100194706	LOC100194706	1275	22	-26.6	429
ssa-miR-18b-3p	NM_001139757.1	uncharacterized protein LOC100194706	LOC100194706	1275	24	-22.6	14
ssa-miR-462a-5p	NM_001139757.1	uncharacterized protein LOC100194706	LOC100194706	1275	23	-20.5	1240
ssa-miR-146d-1-3p	NM_001139760.1	Vacuolar protein sorting-associated protein 29 (Vesicle protein sorting 29)	vps29	579	22	-22.6	478
ssa-miR-29b-1-5p	NM_001139761.1	Selenoprotein T	LOC100194716	1526	23	-21.4	1406
ssa-miR-29b-1-5p	NM_001139761.1	Selenoprotein T	LOC100194716	1526	23	-18.7	903
ssa-miR-30a-3-4-3p	NM_001139761.1	Selenoprotein T	LOC100194716	1526	22	-27.9	7
ssa-miR-731-3p	NM_001139761.1	Selenoprotein T	LOC100194716	1526	22	-24	11
ssa-miR-29a-5p	NM_001139763.1	Elongation factor 1 gamma	Ef-1g ef-1g EF1G	611	23	-24.1	293
ssa-miR-29e-5p	NM_001139763.1	Elongation factor 1 gamma	Ef-1g ef-1g EF1G	611	23	-24.1	293
ssa-miR-novel-13-5p	NM_001139763.1	Elongation factor 1 gamma	Ef-1g ef-1g EF1G	611	22	-20.3	324
ssa-miR-200b-5p	NM_001139764.1	ATP-dependent RNA helicase DDX51	DDX51 ddx51	174	22	-19.1	2
ssa-let-7b-3p	NM_001139765.1	Cell division protein kinase 9	CDK9 cdk9	774	22	-21.7	493
ssa-let-7d-c-1-3p	NM_001139765.1	Cell division protein kinase 9	CDK9 cdk9	774	22	-18.9	505
ssa-miR-146d-1-3p	NM_001139765.1	Cell division protein kinase 9	CDK9 cdk9	774	22	-21.1	461
ssa-miR-21a-1-3p	NM_001139765.1	Cell division protein kinase 9	CDK9 cdk9	774	21	-21.5	690
ssa-miR-26d-5p	NM_001139765.1	Cell division protein kinase 9	CDK9 cdk9	774	22	-20.1	278
ssa-miR-26d-5p	NM_001139766.1	GTP-binding protein GEM	GEM gem	1009	22	-18.4	427
ssa-let-7a-1-3-3p	NM_001139767.1	GATA-binding factor 1 (GATA-binding factor 3)	GATA3 gata1 gata3	548	22	-19.5	89
ssa-miR-novel-5-3p	NM_001139767.1	GATA-binding factor 1 (GATA-binding factor 3)	GATA3 gata1 gata3	548	22	-27.4	42
ssa-miR-10b-5p	NM_001139768.1	ATP-binding cassette sub-family E member 1	ABCE1 abce1 LOC106610219	653	22	-18.2	223
ssa-miR-10d-5p	NM_001139768.1	ATP-binding cassette sub-family E member 1	ABCE1 abce1 LOC106610219	653	22	-19.6	223
ssa-miR-18c-3p	NM_001139768.1	ATP-binding cassette sub-family E member 1	ABCE1 abce1 LOC106610219	653	22	-22.1	476
ssa-miR-21a-2-3p	NM_001139769.1	Nogo-B receptor	NGBR ngbr	1089	22	-19.8	916
ssa-miR-21b-3p	NM_001139769.1	Nogo-B receptor	NGBR ngbr	1089	22	-19.4	916
ssa-miR-29a-3p	NM_001139769.1	Nogo-B receptor	NGBR ngbr	1089	20	-20.4	972
ssa-miR-29b-3p	NM_001139769.1	Nogo-B receptor	NGBR ngbr	1089	22	-22	959
ssa-miR-29c-3p	NM_001139769.1	Nogo-B receptor	NGBR ngbr	1089	22	-20.4	972
ssa-miR-29d-5p	NM_001139769.1	Nogo-B receptor	NGBR ngbr	1089	23	-19.4	315
ssa-miR-29de-3p	NM_001139769.1	Nogo-B receptor	NGBR ngbr	1089	20	-20.4	972
ssa-miR-10b-5p	NM_001139770.1	Syntaxin-5 (syntaxin-5 isoform X1)	STX5 stx5	1352	22	-18.3	315
ssa-miR-10d-5p	NM_001139770.1	Syntaxin-5 (syntaxin-5 isoform X1)	STX5 stx5	1352	22	-18.4	315
ssa-miR-192a-5p	NM_001139770.1	Syntaxin-5 (syntaxin-5 isoform X1)	STX5 stx5	1352	21	-19.8	1217
ssa-miR-21a-2-3p	NM_001139770.1	Syntaxin-5 (syntaxin-5 isoform X1)	STX5 stx5	1352	22	-20.2	256
ssa-miR-21b-3p	NM_001139770.1	Syntaxin-5 (syntaxin-5 isoform X1)	STX5 stx5	1352	22	-20.1	256
ssa-miR-18b-3p	NM_001139771.1	Zinc transporter SLC39A7 (Zinc transporter SLC39A7 precursor) (zinc transporter SLC39A7 isoform X1)	KE4 ke4	1518	24	-25.7	379
ssa-miR-192a-5p	NM_001139771.1	Zinc transporter SLC39A7 (Zinc transporter SLC39A7 precursor) (zinc transporter SLC39A7 isoform X1)	KE4 ke4	1518	21	-21.5	123
ssa-miR-26d-5p	NM_001139771.1	Zinc transporter SLC39A7 (Zinc transporter SLC39A7 precursor) (zinc transporter SLC39A7 isoform X1)	KE4 ke4	1518	22	-27.3	527
ssa-miR-27a-2-5p	NM_001139771.1	Zinc transporter SLC39A7 (Zinc transporter SLC39A7 precursor) (zinc transporter SLC39A7 isoform X1)	KE4 ke4	1518	25	-18.3	99
ssa-miR-459-3p	NM_001139771.1	Zinc transporter SLC39A7 (Zinc transporter SLC39A7 precursor) (zinc transporter SLC39A7 isoform X1)	KE4 ke4	1518	22	-21	180
ssa-miR-8159-5p	NM_001139771.1	Zinc transporter SLC39A7 (Zinc transporter SLC39A7 precursor) (zinc transporter SLC39A7 isoform X1)	KE4 ke4	1518	24	-21.9	622
ssa-miR-462a-3p	NM_001139772.1	EH domain-containing protein 4 isoform X1	EHD4 ehd4	1689	22	-22.4	1220
ssa-miR-727b-3p	NM_001139772.1	EH domain-containing protein 4 isoform X1	EHD4 ehd4	1689	19	-25.2	1197
ssa-miR-8158-3p	NM_001139772.1	EH domain-containing protein 4 isoform X1	EHD4 ehd4	1689	23	-22.3	1313
ssa-miR-727b-3p	NM_001139773.1	Complement component C7 precursor	CO7 co7	186	19	-18.4	3
ssa-miR-10b-5p	NM_001139774.1	Epidermis-type lipoxygenase 3	LOXE3 loxe3	622	22	-18.3	388
ssa-miR-10d-5p	NM_001139774.1	Epidermis-type lipoxygenase 3	LOXE3 loxe3	622	22	-18.4	388
ssa-miR-21a-2-3p	NM_001139774.1	Epidermis-type lipoxygenase 3	LOXE3 loxe3	622	22	-18.4	62
ssa-miR-21b-3p	NM_001139774.1	Epidermis-type lipoxygenase 3	LOXE3 loxe3	622	22	-18.1	62
ssa-miR-30c-d-1-3p	NM_001139774.1	Epidermis-type lipoxygenase 3	LOXE3 loxe3	622	22	-21.5	482
ssa-miR-30d-2-3p	NM_001139774.1	Epidermis-type lipoxygenase 3	LOXE3 loxe3	622	23	-21.6	482
ssa-miR-21a-1-3p	NM_001139775.1	Cysteine protease (EC 3.4.22.-)	ATG4B atg4b	642	21	-20.8	473
ssa-miR-456-3p	NM_001139775.1	Cysteine protease (EC 3.4.22.-)	ATG4B atg4b	642	22	-33.1	81
ssa-let-7b-3p	NM_001139776.1	PKHD domain-containing transmembrane protein FLJ22222 (YQ007 protein)	YQ007 yq007	1042	22	-25.6	739
ssa-let-7d-c-1-3p	NM_001139776.1	PKHD domain-containing transmembrane protein FLJ22222 (YQ007 protein)	YQ007 yq007	1042	22	-25.4	734
ssa-miR-10d-5p	NM_001139776.1	PKHD domain-containing transmembrane protein FLJ22222 (YQ007 protein)	YQ007 yq007	1042	22	-18.9	283
ssa-miR-29a-3p	NM_001139776.1	PKHD domain-containing transmembrane protein FLJ22222 (YQ007 protein)	YQ007 yq007	1042	20	-23.2	179
ssa-miR-29b-3p	NM_001139776.1	PKHD domain-containing transmembrane protein FLJ22222 (YQ007 protein)	YQ007 yq007	1042	22	-23.3	179
ssa-miR-29c-3p	NM_001139776.1	PKHD domain-containing transmembrane protein FLJ22222 (YQ007 protein)	YQ007 yq007	1042	22	-23.3	179
ssa-miR-29de-3p	NM_001139776.1	PKHD domain-containing transmembrane protein FLJ22222 (YQ007 protein)	YQ007 yq007	1042	20	-25	179
ssa-miR-459-3p	NM_001139776.1	PKHD domain-containing transmembrane protein FLJ22222 (YQ007 protein)	YQ007 yq007	1042	22	-19.9	762
ssa-miR-100a-5p	NM_001139777.1	Phosphoglycerate mutase (EC 5.4.2.11) (EC 5.4.2.4)	PGAM1 pgam1	2168	22	-23.4	1779
ssa-miR-100a-5p	NM_001139777.1	Phosphoglycerate mutase (EC 5.4.2.11) (EC 5.4.2.4)	PGAM1 pgam1	2168	22	-21.9	1850
ssa-miR-21a-2-3p	NM_001139777.1	Phosphoglycerate mutase (EC 5.4.2.11) (EC 5.4.2.4)	PGAM1 pgam1	2168	22	-25.2	1793
ssa-miR-21b-3p	NM_001139777.1	Phosphoglycerate mutase (EC 5.4.2.11) (EC 5.4.2.4)	PGAM1 pgam1	2168	22	-23.4	1793
ssa-miR-30c-d-1-3p	NM_001139777.1	Phosphoglycerate mutase (EC 5.4.2.11) (EC 5.4.2.4)	PGAM1 pgam1	2168	22	-21.4	1252
ssa-miR-30d-2-3p	NM_001139777.1	Phosphoglycerate mutase (EC 5.4.2.11) (EC 5.4.2.4)	PGAM1 pgam1	2168	23	-24	1247
ssa-miR-122-5p	NM_001139778.1	Creatine kinase B-type	KCRB kcrb	274	22	-23.1	86
ssa-miR-192a-5p	NM_001139781.1	Potassium channel subfamily K member	KCNK6 kcnk6	1060	21	-18.2	407
ssa-miR-8159-5p	NM_001139781.1	Potassium channel subfamily K member	KCNK6 kcnk6	1060	24	-18.6	96
ssa-miR-125a-1-3p	NM_001139782.1	Acyl-protein thioesterase 2 (acyl-protein thioesterase 2 isoform X2)	LYPA2 lypa2	2067	22	-27.3	305
ssa-miR-143-3p	NM_001139782.1	Acyl-protein thioesterase 2 (acyl-protein thioesterase 2 isoform X2)	LYPA2 lypa2	2067	21	-18.8	1893
ssa-miR-192a-1-3p	NM_001139782.1	Acyl-protein thioesterase 2 (acyl-protein thioesterase 2 isoform X2)	LYPA2 lypa2	2067	22	-22.6	1215
ssa-miR-192b-5p	NM_001139782.1	Acyl-protein thioesterase 2 (acyl-protein thioesterase 2 isoform X2)	LYPA2 lypa2	2067	22	-22.6	1215
ssa-miR-29d-5p	NM_001139782.1	Acyl-protein thioesterase 2 (acyl-protein thioesterase 2 isoform X2)	LYPA2 lypa2	2067	23	-28	1064
ssa-miR-30c-d-1-3p	NM_001139782.1	Acyl-protein thioesterase 2 (acyl-protein thioesterase 2 isoform X2)	LYPA2 lypa2	2067	22	-18.9	1504
ssa-miR-30d-2-3p	NM_001139782.1	Acyl-protein thioesterase 2 (acyl-protein thioesterase 2 isoform X2)	LYPA2 lypa2	2067	23	-19	1504
ssa-miR-8159-5p	NM_001139782.1	Acyl-protein thioesterase 2 (acyl-protein thioesterase 2 isoform X2)	LYPA2 lypa2	2067	24	-22.8	1513
ssa-miR-29d-5p	NM_001139783.1	aldehyde dehydrogenase family 7 member A1 homolog	AL7A1 al7a1	458	23	-23.9	3
ssa-miR-100a-2-3p	NM_001139784.1	Coiled-coil domain-containing protein 82	CCD82 ccd82	683	23	-19.3	600
ssa-miR-184-3p	NM_001139784.1	Coiled-coil domain-containing protein 82	CCD82 ccd82	683	22	-27.6	442
ssa-miR-21a-2-3p	NM_001139784.1	Coiled-coil domain-containing protein 82	CCD82 ccd82	683	22	-21.3	449
ssa-miR-21b-3p	NM_001139784.1	Coiled-coil domain-containing protein 82	CCD82 ccd82	683	22	-21.2	449
ssa-miR-187-5p	NM_001139785.1	Nicotinamide-nucleotide adenylyltransferase (EC 2.7.7.1) (EC 2.7.7.18) (Nicotinate-nucleotide adenylyltransferase)	NMNA1 nmna1 nmnat1	862	24	-28.4	816
ssa-miR-26d-5p	NM_001139785.1	Nicotinamide-nucleotide adenylyltransferase (EC 2.7.7.1) (EC 2.7.7.18) (Nicotinate-nucleotide adenylyltransferase)	NMNA1 nmna1 nmnat1	862	22	-19.5	185
ssa-miR-novel-5-5p	NM_001139785.1	Nicotinamide-nucleotide adenylyltransferase (EC 2.7.7.1) (EC 2.7.7.18) (Nicotinate-nucleotide adenylyltransferase)	NMNA1 nmna1 nmnat1	862	22	-21	117
ssa-miR-125b-3-3p	NM_001139786.1	Globoside alpha-1,3-N-acetylgalactosaminyltransferase 1	GBGT1 gbgt1	515	22	-23.6	168
ssa-miR-novel-5-3p	NM_001139786.1	Globoside alpha-1,3-N-acetylgalactosaminyltransferase 1	GBGT1 gbgt1	515	22	-27.8	336
ssa-miR-21a-2-3p	NM_001139787.1	Interactor protein for cytohesin exchange factors 1	ICEF1 icef1	978	22	-22.1	233
ssa-miR-21b-3p	NM_001139787.1	Interactor protein for cytohesin exchange factors 1	ICEF1 icef1	978	22	-22.1	233
ssa-miR-192a-1-3p	NM_001139788.1	Ras-related protein Rab-18	RAB18 rab18	1602	22	-23.8	643
ssa-miR-192b-5p	NM_001139788.1	Ras-related protein Rab-18	RAB18 rab18	1602	22	-21.8	650
ssa-miR-29a-5p	NM_001139788.1	Ras-related protein Rab-18	RAB18 rab18	1602	23	-24.5	4
ssa-miR-29e-5p	NM_001139788.1	Ras-related protein Rab-18	RAB18 rab18	1602	23	-29.4	4
ssa-miR-8159-5p	NM_001139788.1	Ras-related protein Rab-18	RAB18 rab18	1602	24	-18.8	944
ssa-let-7b-3p	NM_001139789.1	Nuclear transcription factor Y subunit gamma	NFYC nfyc	1539	22	-18.9	1267
ssa-let-7d-c-1-3p	NM_001139789.1	Nuclear transcription factor Y subunit gamma	NFYC nfyc	1539	22	-19.5	1267
ssa-miR-10b-5p	NM_001139789.1	Nuclear transcription factor Y subunit gamma	NFYC nfyc	1539	22	-18.1	402
ssa-miR-125b-3-3p	NM_001139789.1	Nuclear transcription factor Y subunit gamma	NFYC nfyc	1539	22	-28.7	325
ssa-miR-184-3p	NM_001139789.1	Nuclear transcription factor Y subunit gamma	NFYC nfyc	1539	22	-27.9	957
ssa-miR-18b-3p	NM_001139791.1	C16orf68 (CP068 protein)	CP068 cp068	814	24	-25.2	485
ssa-miR-18c-3p	NM_001139791.1	C16orf68 (CP068 protein)	CP068 cp068	814	22	-20.3	145
ssa-miR-8162-5p	NM_001139791.1	C16orf68 (CP068 protein)	CP068 cp068	814	23	-20	31
ssa-miR-128-1-5p	NM_001139792.1	MAP kinase-activated protein kinase 3 (mitogen-activated protein kinase 3) (EC 2.7.11.1)	MAPK3 mapk3	1339	23	-30.6	3
ssa-miR-128-2-5p	NM_001139792.1	MAP kinase-activated protein kinase 3 (mitogen-activated protein kinase 3) (EC 2.7.11.1)	MAPK3 mapk3	1339	23	-30.8	3
ssa-miR-128-3-5p	NM_001139792.1	MAP kinase-activated protein kinase 3 (mitogen-activated protein kinase 3) (EC 2.7.11.1)	MAPK3 mapk3	1339	23	-30.1	3
ssa-miR-146d-1-3p	NM_001139792.1	MAP kinase-activated protein kinase 3 (mitogen-activated protein kinase 3) (EC 2.7.11.1)	MAPK3 mapk3	1339	22	-21	569
ssa-miR-187-5p	NM_001139792.1	MAP kinase-activated protein kinase 3 (mitogen-activated protein kinase 3) (EC 2.7.11.1)	MAPK3 mapk3	1339	24	-27.8	551
ssa-miR-187-5p	NM_001139792.1	MAP kinase-activated protein kinase 3 (mitogen-activated protein kinase 3) (EC 2.7.11.1)	MAPK3 mapk3	1339	24	-18.7	237
ssa-miR-21a-2-3p	NM_001139792.1	MAP kinase-activated protein kinase 3 (mitogen-activated protein kinase 3) (EC 2.7.11.1)	MAPK3 mapk3	1339	22	-21.3	98
ssa-miR-21b-3p	NM_001139792.1	MAP kinase-activated protein kinase 3 (mitogen-activated protein kinase 3) (EC 2.7.11.1)	MAPK3 mapk3	1339	22	-23.7	98
ssa-miR-222b-5p	NM_001139792.1	MAP kinase-activated protein kinase 3 (mitogen-activated protein kinase 3) (EC 2.7.11.1)	MAPK3 mapk3	1339	22	-19.1	1268
ssa-miR-26a-3-3p	NM_001139792.1	MAP kinase-activated protein kinase 3 (mitogen-activated protein kinase 3) (EC 2.7.11.1)	MAPK3 mapk3	1339	22	-19.8	814
ssa-miR-29b-2-5p	NM_001139792.1	MAP kinase-activated protein kinase 3 (mitogen-activated protein kinase 3) (EC 2.7.11.1)	MAPK3 mapk3	1339	25	-19.7	1033
ssa-miR-459-3p	NM_001139792.1	MAP kinase-activated protein kinase 3 (mitogen-activated protein kinase 3) (EC 2.7.11.1)	MAPK3 mapk3	1339	22	-19.3	93
ssa-miR-8159-3p	NM_001139792.1	MAP kinase-activated protein kinase 3 (mitogen-activated protein kinase 3) (EC 2.7.11.1)	MAPK3 mapk3	1339	21	-22	1
ssa-miR-novel-2-3p	NM_001139792.1	MAP kinase-activated protein kinase 3 (mitogen-activated protein kinase 3) (EC 2.7.11.1)	MAPK3 mapk3	1339	22	-20.6	137
ssa-miR-192a-5p	NM_001139793.1	Tubulin beta chain	TBB5 LOC106588409 tbb5	589	21	-19.6	353
ssa-miR-27a-2-5p	NM_001139793.1	Tubulin beta chain	TBB5 LOC106588409 tbb5	589	25	-23.3	7
ssa-miR-200b-5p	NM_001139794.1	Phosphoglycerate kinase (EC 2.7.2.3)	PGK pgk	720	22	-21	561
ssa-miR-29a-5p	NM_001139794.1	Phosphoglycerate kinase (EC 2.7.2.3)	PGK pgk	720	23	-22.3	205
ssa-miR-29c-5p	NM_001139794.1	Phosphoglycerate kinase (EC 2.7.2.3)	PGK pgk	720	23	-21.5	639
ssa-miR-29e-5p	NM_001139794.1	Phosphoglycerate kinase (EC 2.7.2.3)	PGK pgk	720	23	-18.1	205
ssa-miR-novel-5-3p	NM_001139794.1	Phosphoglycerate kinase (EC 2.7.2.3)	PGK pgk	720	22	-20.9	348
ssa-miR-727b-3p	NM_001139795.1	Dimethylaniline monooxygenase [N-oxide-forming] (EC 1.14.13.8)	FMO5 fmo5	709	19	-20.5	155
ssa-miR-727b-3p	NM_001139795.1	Dimethylaniline monooxygenase [N-oxide-forming] (EC 1.14.13.8)	FMO5 fmo5	709	19	-19.4	128
ssa-miR-727b-3p	NM_001139795.1	Dimethylaniline monooxygenase [N-oxide-forming] (EC 1.14.13.8)	FMO5 fmo5	709	19	-19	18
ssa-miR-146d-1-3p	NM_001139797.1	Torsin family protein C9orf167 homolog	CI167 ci167	619	22	-25.5	169
ssa-miR-30a-3-4-3p	NM_001139797.1	Torsin family protein C9orf167 homolog	CI167 ci167	619	22	-31.7	441
ssa-miR-100a-2-3p	NM_001139798.1	Transmembrane protein 47	TMM47 tmm47	1554	23	-23.5	669
ssa-miR-10b-5p	NM_001139798.1	Transmembrane protein 47	TMM47 tmm47	1554	22	-19.4	781
ssa-miR-10d-5p	NM_001139798.1	Transmembrane protein 47	TMM47 tmm47	1554	22	-19.5	781
ssa-miR-26a-3-3p	NM_001139801.1	Eukaryotic translation initiation factor 3 subunit I (eIF3i) (Eukaryotic translation initiation factor 3 subunit 2) (eIF-3-beta) (eIF3 p36)	EIF3I eif3i EIF3S2	404	22	-18.5	89
ssa-miR-727b-3p	NM_001139801.1	Eukaryotic translation initiation factor 3 subunit I (eIF3i) (Eukaryotic translation initiation factor 3 subunit 2) (eIF-3-beta) (eIF3 p36)	EIF3I eif3i EIF3S2	404	19	-22.3	69
ssa-miR-8159-5p	NM_001139801.1	Eukaryotic translation initiation factor 3 subunit I (eIF3i) (Eukaryotic translation initiation factor 3 subunit 2) (eIF-3-beta) (eIF3 p36)	EIF3I eif3i EIF3S2	404	24	-19.7	110
ssa-miR-100a-2-3p	NM_001139802.1	Neuromodulin	NEUM neum	798	23	-22.2	281
ssa-miR-1338-5p	NM_001139802.1	Neuromodulin	NEUM neum	798	21	-22.9	49
ssa-miR-181a-5-3p	NM_001139802.1	Neuromodulin	NEUM neum	798	22	-18.4	194
ssa-miR-731-3p	NM_001139803.1	PDZ and LIM domain protein 2 (PDZ and LIM domain protein 2 isoform X1)	PDLI2 pdli2	1005	22	-18.8	146
ssa-miR-146a-3-3p	NM_001139804.1	N(G),N(G)-dimethylarginine dimethylaminohydrolase 2 isoform X1 (NG,NG-dimethylarginine dimethylaminohydrolase 2)	DDAH2 ddah2	937	22	-18.5	575
ssa-miR-18c-3p	NM_001139804.1	N(G),N(G)-dimethylarginine dimethylaminohydrolase 2 isoform X1 (NG,NG-dimethylarginine dimethylaminohydrolase 2)	DDAH2 ddah2	937	22	-23.6	775
ssa-miR-novel-2-3p	NM_001139804.1	N(G),N(G)-dimethylarginine dimethylaminohydrolase 2 isoform X1 (NG,NG-dimethylarginine dimethylaminohydrolase 2)	DDAH2 ddah2	937	22	-21	411
ssa-miR-10b-5p	NM_001139805.1	Chitinase domain containing 1-like (Chitinase domain-containing protein 1) (EC 3.6.5.4)	chid1 CHID1	1221	22	-21.1	306
ssa-miR-10d-5p	NM_001139805.1	Chitinase domain containing 1-like (Chitinase domain-containing protein 1) (EC 3.6.5.4)	chid1 CHID1	1221	22	-21.2	306
ssa-miR-132-1-2-5p	NM_001139805.1	Chitinase domain containing 1-like (Chitinase domain-containing protein 1) (EC 3.6.5.4)	chid1 CHID1	1221	22	-24	1084
ssa-miR-222b-5p	NM_001139805.1	Chitinase domain containing 1-like (Chitinase domain-containing protein 1) (EC 3.6.5.4)	chid1 CHID1	1221	22	-24.3	104
ssa-miR-29b-1-5p	NM_001139805.1	Chitinase domain containing 1-like (Chitinase domain-containing protein 1) (EC 3.6.5.4)	chid1 CHID1	1221	23	-18.1	442
ssa-miR-29b-2-5p	NM_001139805.1	Chitinase domain containing 1-like (Chitinase domain-containing protein 1) (EC 3.6.5.4)	chid1 CHID1	1221	25	-23	469
ssa-miR-29c-5p	NM_001139805.1	Chitinase domain containing 1-like (Chitinase domain-containing protein 1) (EC 3.6.5.4)	chid1 CHID1	1221	23	-18.8	1112
ssa-miR-462a-5p	NM_001139805.1	Chitinase domain containing 1-like (Chitinase domain-containing protein 1) (EC 3.6.5.4)	chid1 CHID1	1221	23	-26.2	958
ssa-miR-8159-5p	NM_001139805.1	Chitinase domain containing 1-like (Chitinase domain-containing protein 1) (EC 3.6.5.4)	chid1 CHID1	1221	24	-22.4	969
ssa-miR-8162-5p	NM_001139805.1	Chitinase domain containing 1-like (Chitinase domain-containing protein 1) (EC 3.6.5.4)	chid1 CHID1	1221	23	-21.1	432
ssa-miR-29a-5p	NM_001139806.1	Lysophosphatidic acid phosphatase type 6 (lysophosphatidic acid phosphatase type 6 isoform X1)	PPA6 ppa6	967	23	-18.6	257
ssa-miR-29d-5p	NM_001139806.1	Lysophosphatidic acid phosphatase type 6 (lysophosphatidic acid phosphatase type 6 isoform X1)	PPA6 ppa6	967	23	-28.7	628
ssa-miR-462a-3p	NM_001139806.1	Lysophosphatidic acid phosphatase type 6 (lysophosphatidic acid phosphatase type 6 isoform X1)	PPA6 ppa6	967	22	-26.5	261
ssa-miR-8159-5p	NM_001139806.1	Lysophosphatidic acid phosphatase type 6 (lysophosphatidic acid phosphatase type 6 isoform X1)	PPA6 ppa6	967	24	-24.7	288
ssa-miR-novel-13-5p	NM_001139806.1	Lysophosphatidic acid phosphatase type 6 (lysophosphatidic acid phosphatase type 6 isoform X1)	PPA6 ppa6	967	22	-22	894
ssa-miR-187-5p	NM_001139807.1	Nuclear factor erythroid 2-related factor 2	NF2L2 nf2l2	413	24	-23	300
ssa-miR-29c-5p	NM_001139807.1	Nuclear factor erythroid 2-related factor 2	NF2L2 nf2l2	413	23	-19.9	74
ssa-miR-125b-3-3p	NM_001139808.1	Neurogenic differentiation factor	NDF1 ndf1	1190	22	-23.3	708
ssa-miR-183-5p	NM_001139808.1	Neurogenic differentiation factor	NDF1 ndf1	1190	22	-20.7	985
ssa-miR-187-5p	NM_001139808.1	Neurogenic differentiation factor	NDF1 ndf1	1190	24	-22.7	863
ssa-miR-192a-5p	NM_001139808.1	Neurogenic differentiation factor	NDF1 ndf1	1190	21	-18.8	192
ssa-miR-29b-1-5p	NM_001139808.1	Neurogenic differentiation factor	NDF1 ndf1	1190	23	-18.4	848
ssa-miR-29b-3-5p	NM_001139808.1	Neurogenic differentiation factor	NDF1 ndf1	1190	23	-18	546
ssa-miR-novel-5-3p	NM_001139808.1	Neurogenic differentiation factor	NDF1 ndf1	1190	22	-19.9	91
ssa-miR-146d-1-3p	NM_001139809.1	Dual specificity mitogen-activated protein kinase kinase 2 (dual specificity mitogen-activated protein kinase kinase 2 isoform X1)	MP2K2 mp2k2	1262	22	-19	28
ssa-miR-8159-5p	NM_001139809.1	Dual specificity mitogen-activated protein kinase kinase 2 (dual specificity mitogen-activated protein kinase kinase 2 isoform X1)	MP2K2 mp2k2	1262	24	-20.8	906
ssa-miR-143-3p	NM_001139810.1	Lysosome-associated membrane glycoprotein 2 (lysosomal membrane glycoprotein 2 precursor)	LAMP2 lamp2	2264	21	-18.3	118
ssa-miR-21a-2-3p	NM_001139810.1	Lysosome-associated membrane glycoprotein 2 (lysosomal membrane glycoprotein 2 precursor)	LAMP2 lamp2	2264	22	-25.6	1973
ssa-miR-21b-3p	NM_001139810.1	Lysosome-associated membrane glycoprotein 2 (lysosomal membrane glycoprotein 2 precursor)	LAMP2 lamp2	2264	22	-25.3	1973
ssa-miR-29b-2-5p	NM_001139810.1	Lysosome-associated membrane glycoprotein 2 (lysosomal membrane glycoprotein 2 precursor)	LAMP2 lamp2	2264	25	-20.3	1877
ssa-miR-29d-5p	NM_001139810.1	Lysosome-associated membrane glycoprotein 2 (lysosomal membrane glycoprotein 2 precursor)	LAMP2 lamp2	2264	23	-23.6	450
ssa-miR-8162-5p	NM_001139810.1	Lysosome-associated membrane glycoprotein 2 (lysosomal membrane glycoprotein 2 precursor)	LAMP2 lamp2	2264	23	-25.4	1832
ssa-miR-8162-5p	NM_001139810.1	Lysosome-associated membrane glycoprotein 2 (lysosomal membrane glycoprotein 2 precursor)	LAMP2 lamp2	2264	23	-24.4	829
ssa-miR-21a-1-3p	NM_001139813.1	Glucosidase 2 subunit beta (Glucosidase 2 subunit beta precursor)	GLU2B glu2b	506	21	-21.1	124
ssa-miR-462a-5p	NM_001139813.1	Glucosidase 2 subunit beta (Glucosidase 2 subunit beta precursor)	GLU2B glu2b	506	23	-20.7	120
ssa-miR-731-5p	NM_001139813.1	Glucosidase 2 subunit beta (Glucosidase 2 subunit beta precursor)	GLU2B glu2b	506	23	-21.6	332
ssa-miR-7a-2-6-3p	NM_001139813.1	Glucosidase 2 subunit beta (Glucosidase 2 subunit beta precursor)	GLU2B glu2b	506	22	-20.9	41
ssa-miR-125b-3-3p	NM_001139814.1	archease	ARCH arch	1820	22	-18.3	1326
ssa-miR-132-1-2-5p	NM_001139814.1	archease	ARCH arch	1820	22	-25.8	892
ssa-miR-18c-3p	NM_001139814.1	archease	ARCH arch	1820	22	-30.3	1104
ssa-miR-192a-5p	NM_001139814.1	archease	ARCH arch	1820	21	-19.4	64
ssa-miR-21a-2-3p	NM_001139814.1	archease	ARCH arch	1820	22	-24.2	1568
ssa-miR-21b-3p	NM_001139814.1	archease	ARCH arch	1820	22	-23.8	1568
ssa-miR-222b-5p	NM_001139814.1	archease	ARCH arch	1820	22	-20.1	1182
ssa-miR-7a-2-6-3p	NM_001139814.1	archease	ARCH arch	1820	22	-27.4	1128
ssa-miR-novel-2-3p	NM_001139814.1	archease	ARCH arch	1820	22	-24.6	1677
ssa-miR-122-5p	NM_001139816.1	BRO1 domain-containing protein BROX (BRO1 domain-containing protein BROX isoform X1)	BROX brox	1755	22	-21	515
ssa-miR-122-5p	NM_001139816.1	BRO1 domain-containing protein BROX (BRO1 domain-containing protein BROX isoform X1)	BROX brox	1755	22	-19.4	680
ssa-miR-146d-1-3p	NM_001139816.1	BRO1 domain-containing protein BROX (BRO1 domain-containing protein BROX isoform X1)	BROX brox	1755	22	-21.6	278
ssa-miR-27a-2-5p	NM_001139816.1	BRO1 domain-containing protein BROX (BRO1 domain-containing protein BROX isoform X1)	BROX brox	1755	25	-19.6	79
ssa-miR-27d-1-5p	NM_001139816.1	BRO1 domain-containing protein BROX (BRO1 domain-containing protein BROX isoform X1)	BROX brox	1755	24	-18.1	76
ssa-miR-30c-d-1-3p	NM_001139816.1	BRO1 domain-containing protein BROX (BRO1 domain-containing protein BROX isoform X1)	BROX brox	1755	22	-18.1	635
ssa-miR-100a-2-3p	NM_001139817.1	Phenylalanyl-tRNA synthetase beta chain	SYFB syfb	800	23	-20.5	143
ssa-miR-128-1-5p	NM_001139817.1	Phenylalanyl-tRNA synthetase beta chain	SYFB syfb	800	23	-27.2	165
ssa-miR-128-2-5p	NM_001139817.1	Phenylalanyl-tRNA synthetase beta chain	SYFB syfb	800	23	-28.9	165
ssa-miR-128-3-5p	NM_001139817.1	Phenylalanyl-tRNA synthetase beta chain	SYFB syfb	800	23	-28.5	165
ssa-miR-143-3p	NM_001139817.1	Phenylalanyl-tRNA synthetase beta chain	SYFB syfb	800	21	-21	360
ssa-miR-146d-1-3p	NM_001139817.1	Phenylalanyl-tRNA synthetase beta chain	SYFB syfb	800	22	-20.8	304
ssa-miR-26d-5p	NM_001139817.1	Phenylalanyl-tRNA synthetase beta chain	SYFB syfb	800	22	-19.9	601
ssa-miR-novel-3-5p	NM_001139818.1	Beclin-1	BECN1 becn1	1627	22	-23.1	1338
ssa-miR-727b-3p	NM_001139819.1	Pre-mRNA-splicing regulator WTAP (pre-mRNA-splicing regulator WTAP isoform X1)	FL2D fl2d wtap	582	19	-22.3	87
ssa-miR-25-1-2-5p	NM_001139820.1	DnaJ homolog subfamily C member 1 (DnaJ homolog subfamily C member 1 precursor)	DNJC1 dnjc1	477	23	-19.4	1
ssa-miR-456-3p	NM_001139820.1	DnaJ homolog subfamily C member 1 (DnaJ homolog subfamily C member 1 precursor)	DNJC1 dnjc1	477	22	-23.9	251
ssa-miR-462a-3p	NM_001139820.1	DnaJ homolog subfamily C member 1 (DnaJ homolog subfamily C member 1 precursor)	DNJC1 dnjc1	477	22	-20.4	244
ssa-miR-10b-5p	NM_001139822.1	Anti-apoptotic protein NR13	NR13 nr13	1373	22	-21	966
ssa-miR-10d-5p	NM_001139822.1	Anti-apoptotic protein NR13	NR13 nr13	1373	22	-21.1	966
ssa-miR-29a-3p	NM_001139822.1	Anti-apoptotic protein NR13	NR13 nr13	1373	20	-19.9	1194
ssa-miR-29b-2-5p	NM_001139822.1	Anti-apoptotic protein NR13	NR13 nr13	1373	25	-18.1	15
ssa-miR-29b-3p	NM_001139822.1	Anti-apoptotic protein NR13	NR13 nr13	1373	22	-21.1	1193
ssa-miR-29c-3p	NM_001139822.1	Anti-apoptotic protein NR13	NR13 nr13	1373	22	-21.1	1193
ssa-miR-29de-3p	NM_001139822.1	Anti-apoptotic protein NR13	NR13 nr13	1373	20	-19.5	1194
ssa-miR-7a-2-6-3p	NM_001139822.1	Anti-apoptotic protein NR13	NR13 nr13	1373	22	-18.1	769
ssa-miR-193a-5p	NM_001139823.1	Zinc finger protein 622	ZN622 zn622	423	21	-20.7	19
ssa-miR-7a-2-6-3p	NM_001139824.1	Zinc transporter 6	ZNT6 znt6	646	22	-18.8	272
ssa-miR-125b-3-3p	NM_001139825.1	Cation-dependent mannose-6-phosphate receptor (Cation-dependent mannose-6-phosphate receptor precursor)	MPRD mprd	2172	22	-22.4	248
ssa-miR-192a-5p	NM_001139825.1	Cation-dependent mannose-6-phosphate receptor (Cation-dependent mannose-6-phosphate receptor precursor)	MPRD mprd	2172	21	-28.2	605
ssa-miR-29a-3p	NM_001139825.1	Cation-dependent mannose-6-phosphate receptor (Cation-dependent mannose-6-phosphate receptor precursor)	MPRD mprd	2172	20	-24.6	526
ssa-miR-29b-3p	NM_001139825.1	Cation-dependent mannose-6-phosphate receptor (Cation-dependent mannose-6-phosphate receptor precursor)	MPRD mprd	2172	22	-26.1	524
ssa-miR-29c-3p	NM_001139825.1	Cation-dependent mannose-6-phosphate receptor (Cation-dependent mannose-6-phosphate receptor precursor)	MPRD mprd	2172	22	-26.8	524
ssa-miR-29d-5p	NM_001139825.1	Cation-dependent mannose-6-phosphate receptor (Cation-dependent mannose-6-phosphate receptor precursor)	MPRD mprd	2172	23	-22	1005
ssa-miR-29de-3p	NM_001139825.1	Cation-dependent mannose-6-phosphate receptor (Cation-dependent mannose-6-phosphate receptor precursor)	MPRD mprd	2172	20	-24.6	526
ssa-miR-462a-3p	NM_001139825.1	Cation-dependent mannose-6-phosphate receptor (Cation-dependent mannose-6-phosphate receptor precursor)	MPRD mprd	2172	22	-20.5	560
ssa-miR-novel-2-3p	NM_001139825.1	Cation-dependent mannose-6-phosphate receptor (Cation-dependent mannose-6-phosphate receptor precursor)	MPRD mprd	2172	22	-18.1	1359
ssa-miR-128-1-5p	NM_001139826.1	Integral membrane protein 2A	ITM2A itm2a	1821	23	-35.9	604
ssa-miR-128-1-5p	NM_001139826.1	Integral membrane protein 2A	ITM2A itm2a	1821	23	-34	577
ssa-miR-128-2-5p	NM_001139826.1	Integral membrane protein 2A	ITM2A itm2a	1821	23	-34.9	604
ssa-miR-128-2-5p	NM_001139826.1	Integral membrane protein 2A	ITM2A itm2a	1821	23	-32.4	577
ssa-miR-128-3-5p	NM_001139826.1	Integral membrane protein 2A	ITM2A itm2a	1821	23	-35.9	604
ssa-miR-128-3-5p	NM_001139826.1	Integral membrane protein 2A	ITM2A itm2a	1821	23	-33.5	577
ssa-miR-192a-1-3p	NM_001139826.1	Integral membrane protein 2A	ITM2A itm2a	1821	22	-26.5	680
ssa-miR-192b-5p	NM_001139826.1	Integral membrane protein 2A	ITM2A itm2a	1821	22	-26.5	680
ssa-miR-8159-3p	NM_001139826.1	Integral membrane protein 2A	ITM2A itm2a	1821	21	-31.3	567
ssa-miR-8159-3p	NM_001139826.1	Integral membrane protein 2A	ITM2A itm2a	1821	21	-26.3	631
ssa-miR-8159-3p	NM_001139826.1	Integral membrane protein 2A	ITM2A itm2a	1821	21	-25.4	601
ssa-miR-187-5p	NM_001139827.1	LIM domain-containing protein	LIMS1 lims1	1058	24	-21.9	168
ssa-miR-26d-5p	NM_001139827.1	LIM domain-containing protein	LIMS1 lims1	1058	22	-18.7	147
ssa-miR-459-3p	NM_001139827.1	LIM domain-containing protein	LIMS1 lims1	1058	22	-26	56
ssa-let-7a-1-3-3p	NM_001139828.1	Myeloid leukemia factor 2	MLF2 mlf2	514	22	-19.2	368
ssa-miR-1338-5p	NM_001139828.1	Myeloid leukemia factor 2	MLF2 mlf2	514	21	-19.9	368
ssa-miR-novel-13-5p	NM_001139828.1	Myeloid leukemia factor 2	MLF2 mlf2	514	22	-19.7	1
ssa-miR-143-3p	NM_001139829.1	Transforming growth factor-beta-inducible early growth response protein 3	TIEG3 tieg3	777	21	-24.9	3
ssa-let-7a-1-3-3p	NM_001139830.1	Glycogenin-1	GLYG glyg	2529	22	-22.7	1149
ssa-let-7b-3p	NM_001139830.1	Glycogenin-1	GLYG glyg	2529	22	-18.8	1641
ssa-let-7e-5p	NM_001139830.1	Glycogenin-1	GLYG glyg	2529	22	-24.5	733
ssa-let-7f-5p	NM_001139830.1	Glycogenin-1	GLYG glyg	2529	22	-22.1	733
ssa-miR-125b-3-3p	NM_001139830.1	Glycogenin-1	GLYG glyg	2529	22	-23.1	2333
ssa-miR-26d-5p	NM_001139830.1	Glycogenin-1	GLYG glyg	2529	22	-19.8	2426
ssa-miR-30c-d-1-3p	NM_001139830.1	Glycogenin-1	GLYG glyg	2529	22	-18.4	633
ssa-miR-30d-2-3p	NM_001139830.1	Glycogenin-1	GLYG glyg	2529	23	-19.7	633
ssa-miR-727b-3p	NM_001139830.1	Glycogenin-1	GLYG glyg	2529	19	-22.7	27
ssa-miR-727b-3p	NM_001139830.1	Glycogenin-1	GLYG glyg	2529	19	-19.5	1892
ssa-miR-novel-5-5p	NM_001139830.1	Glycogenin-1	GLYG glyg	2529	22	-20.4	1862
ssa-let-7b-3p	NM_001139831.1	AP complex subunit sigma	AP1S2 ap1s2	1764	22	-20.5	267
ssa-let-7e-5p	NM_001139831.1	AP complex subunit sigma	AP1S2 ap1s2	1764	22	-19.3	722
ssa-let-7f-5p	NM_001139831.1	AP complex subunit sigma	AP1S2 ap1s2	1764	22	-21	720
ssa-miR-129-5p	NM_001139831.1	AP complex subunit sigma	AP1S2 ap1s2	1764	21	-18.5	1728
ssa-miR-18b-3p	NM_001139831.1	AP complex subunit sigma	AP1S2 ap1s2	1764	24	-26.7	1571
ssa-miR-25-1-2-5p	NM_001139831.1	AP complex subunit sigma	AP1S2 ap1s2	1764	23	-31.4	806
ssa-miR-25-1-2-5p	NM_001139831.1	AP complex subunit sigma	AP1S2 ap1s2	1764	23	-31.4	908
ssa-miR-25-1-2-5p	NM_001139831.1	AP complex subunit sigma	AP1S2 ap1s2	1764	23	-31.4	1010
ssa-miR-25-1-2-5p	NM_001139831.1	AP complex subunit sigma	AP1S2 ap1s2	1764	23	-30.2	869
ssa-miR-25-1-2-5p	NM_001139831.1	AP complex subunit sigma	AP1S2 ap1s2	1764	23	-30.2	971
ssa-miR-459-3p	NM_001139831.1	AP complex subunit sigma	AP1S2 ap1s2	1764	22	-23.1	1396
ssa-miR-459-3p	NM_001139831.1	AP complex subunit sigma	AP1S2 ap1s2	1764	22	-23	1529
ssa-miR-7a-2-6-3p	NM_001139831.1	AP complex subunit sigma	AP1S2 ap1s2	1764	22	-19.4	1252
ssa-miR-novel-5-3p	NM_001139831.1	AP complex subunit sigma	AP1S2 ap1s2	1764	22	-25.7	1163
ssa-let-7d-c-1-3p	NM_001139832.1	Arachidonate 5-lipoxygenase	LOX5 lox5	257	22	-19	179
ssa-miR-30c-d-1-3p	NM_001139833.1	Nuclear pore complex protein	NU107 nu107	140	22	-18.3	86
ssa-miR-30d-2-3p	NM_001139833.1	Nuclear pore complex protein	NU107 nu107	140	23	-19.1	79
ssa-miR-183-5p	NM_001139834.1	ADP-ribosylation factor 3 isoform X1	ARF3 arf3	1375	22	-19.6	210
ssa-miR-192a-1-3p	NM_001139834.1	ADP-ribosylation factor 3 isoform X1	ARF3 arf3	1375	22	-19.2	482
ssa-miR-192b-5p	NM_001139834.1	ADP-ribosylation factor 3 isoform X1	ARF3 arf3	1375	22	-19.3	482
ssa-miR-29c-5p	NM_001139834.1	ADP-ribosylation factor 3 isoform X1	ARF3 arf3	1375	23	-18	942
ssa-miR-21a-2-3p	NM_001139835.1	Deoxyribose-phosphate aldolase (EC 4.1.2.4) (deoxyribose-phosphate aldolase isoform X1)	DEOC deoc dera	766	22	-21.5	618
ssa-miR-21b-3p	NM_001139835.1	Deoxyribose-phosphate aldolase (EC 4.1.2.4) (deoxyribose-phosphate aldolase isoform X1)	DEOC deoc dera	766	22	-26	631
ssa-miR-456-3p	NM_001139835.1	Deoxyribose-phosphate aldolase (EC 4.1.2.4) (deoxyribose-phosphate aldolase isoform X1)	DEOC deoc dera	766	22	-27.4	23
ssa-let-7b-3p	NM_001139836.1	FAM69B precursor	FA69B fa69b	668	22	-19.8	324
ssa-miR-183-5p	NM_001139836.1	FAM69B precursor	FA69B fa69b	668	22	-27	618
ssa-miR-10b-5p	NM_001139837.1	Ubiquilin-4	UBQL4 ubql4	1378	22	-18.4	594
ssa-miR-10d-5p	NM_001139837.1	Ubiquilin-4	UBQL4 ubql4	1378	22	-18.5	594
ssa-miR-146a-1-2-3p	NM_001139837.1	Ubiquilin-4	UBQL4 ubql4	1378	23	-20.6	223
ssa-miR-146b-3p	NM_001139837.1	Ubiquilin-4	UBQL4 ubql4	1378	22	-19.5	238
ssa-miR-29c-5p	NM_001139837.1	Ubiquilin-4	UBQL4 ubql4	1378	23	-18.7	820
ssa-miR-459-3p	NM_001139837.1	Ubiquilin-4	UBQL4 ubql4	1378	22	-24.7	177
ssa-miR-novel-2-3p	NM_001139837.1	Ubiquilin-4	UBQL4 ubql4	1378	22	-21	122
ssa-miR-146d-1-3p	NM_001139838.1	TM2 domain-containing protein 3 precursor	TM2D3 tm2d3	1397	22	-21.1	84
ssa-miR-184-3p	NM_001139838.1	TM2 domain-containing protein 3 precursor	TM2D3 tm2d3	1397	22	-22.6	919
ssa-miR-192a-5p	NM_001139838.1	TM2 domain-containing protein 3 precursor	TM2D3 tm2d3	1397	21	-22.3	1062
ssa-miR-222b-5p	NM_001139838.1	TM2 domain-containing protein 3 precursor	TM2D3 tm2d3	1397	22	-25.3	249
ssa-miR-29a-5p	NM_001139838.1	TM2 domain-containing protein 3 precursor	TM2D3 tm2d3	1397	23	-20.4	874
ssa-miR-29e-5p	NM_001139838.1	TM2 domain-containing protein 3 precursor	TM2D3 tm2d3	1397	23	-20.5	874
ssa-miR-456-3p	NM_001139838.1	TM2 domain-containing protein 3 precursor	TM2D3 tm2d3	1397	22	-25.3	1163
ssa-miR-7a-2-6-3p	NM_001139838.1	TM2 domain-containing protein 3 precursor	TM2D3 tm2d3	1397	22	-18.4	1092
ssa-miR-novel-5-3p	NM_001139838.1	TM2 domain-containing protein 3 precursor	TM2D3 tm2d3	1397	22	-19.8	1198
ssa-miR-18b-3p	NM_001139839.1	N-acetylneuraminate lyase isoform X1	NPL npl	826	24	-36.5	277
ssa-miR-456-3p	NM_001139839.1	N-acetylneuraminate lyase isoform X1	NPL npl	826	22	-27.5	12
ssa-miR-novel-5-5p	NM_001139839.1	N-acetylneuraminate lyase isoform X1	NPL npl	826	22	-20.9	525
ssa-miR-100a-2-3p	NM_001139840.1	Collectrin (Collectrin precursor)	TMM27 tmm27	1324	23	-23.7	320
ssa-miR-146d-1-3p	NM_001139840.1	Collectrin (Collectrin precursor)	TMM27 tmm27	1324	22	-19.4	688
ssa-miR-221-5p	NM_001139840.1	Collectrin (Collectrin precursor)	TMM27 tmm27	1324	23	-27.8	340
ssa-let-7b-3p	NM_001139841.1	F-box only protein 4	FBX4 fbx4	1292	22	-26.1	955
ssa-let-7d-c-1-3p	NM_001139841.1	F-box only protein 4	FBX4 fbx4	1292	22	-22.7	950
ssa-miR-18c-3p	NM_001139841.1	F-box only protein 4	FBX4 fbx4	1292	22	-18.9	269
ssa-miR-29d-5p	NM_001139841.1	F-box only protein 4	FBX4 fbx4	1292	23	-27.2	526
ssa-miR-30d-2-3p	NM_001139841.1	F-box only protein 4	FBX4 fbx4	1292	23	-18.4	1226
ssa-miR-462a-3p	NM_001139841.1	F-box only protein 4	FBX4 fbx4	1292	22	-24	304
ssa-miR-122-5p	NM_001139842.1	BNIP2 motif-containing molecule at the C-terminal region 1	BMCC1 bmcc1	1346	22	-21.9	183
ssa-miR-192a-1-3p	NM_001139842.1	BNIP2 motif-containing molecule at the C-terminal region 1	BMCC1 bmcc1	1346	22	-21.1	253
ssa-miR-192b-5p	NM_001139842.1	BNIP2 motif-containing molecule at the C-terminal region 1	BMCC1 bmcc1	1346	22	-21.1	253
ssa-miR-26d-5p	NM_001139842.1	BNIP2 motif-containing molecule at the C-terminal region 1	BMCC1 bmcc1	1346	22	-19.8	472
ssa-miR-29a-3p	NM_001139842.1	BNIP2 motif-containing molecule at the C-terminal region 1	BMCC1 bmcc1	1346	20	-20.5	389
ssa-miR-29b-3p	NM_001139842.1	BNIP2 motif-containing molecule at the C-terminal region 1	BMCC1 bmcc1	1346	22	-21.8	387
ssa-miR-29c-3p	NM_001139842.1	BNIP2 motif-containing molecule at the C-terminal region 1	BMCC1 bmcc1	1346	22	-20.5	389
ssa-miR-29de-3p	NM_001139842.1	BNIP2 motif-containing molecule at the C-terminal region 1	BMCC1 bmcc1	1346	20	-19.9	389
ssa-miR-21a-2-3p	NM_001139843.1	Vesicle-fusing ATPase (EC 3.6.4.6)	NSF nsf	1098	22	-21.8	942
ssa-miR-21b-3p	NM_001139843.1	Vesicle-fusing ATPase (EC 3.6.4.6)	NSF nsf	1098	22	-22	949
ssa-miR-29b-2-5p	NM_001139843.1	Vesicle-fusing ATPase (EC 3.6.4.6)	NSF nsf	1098	25	-23.1	331
ssa-miR-novel-2-3p	NM_001139843.1	Vesicle-fusing ATPase (EC 3.6.4.6)	NSF nsf	1098	22	-20.2	7
ssa-miR-192a-1-3p	NM_001139845.1	UDP-N-acetylglucosamine--dolichyl-phosphate N-acetylglucosaminephosphotransferase (EC 2.7.8.15)	GPT gpt	739	22	-26.3	146
ssa-miR-192b-5p	NM_001139845.1	UDP-N-acetylglucosamine--dolichyl-phosphate N-acetylglucosaminephosphotransferase (EC 2.7.8.15)	GPT gpt	739	22	-26.3	146
ssa-miR-26a-3-3p	NM_001139845.1	UDP-N-acetylglucosamine--dolichyl-phosphate N-acetylglucosaminephosphotransferase (EC 2.7.8.15)	GPT gpt	739	22	-19.4	194
ssa-miR-21a-2-3p	NM_001139846.1	1-O-acylceramide synthase precursor	LYPA3 lypa3	545	22	-19.2	354
ssa-miR-21b-3p	NM_001139846.1	1-O-acylceramide synthase precursor	LYPA3 lypa3	545	22	-20.3	357
ssa-miR-29c-5p	NM_001139846.1	1-O-acylceramide synthase precursor	LYPA3 lypa3	545	23	-18.3	283
ssa-let-7e-5p	NM_001139847.1	Phosphatidic acid phosphatase type 2 domain-containing protein 1B (phosphatidic acid phosphatase type 2 domain-containing protein 1B isoform X2)	PPC1B ppc1b	729	22	-19.2	169
ssa-let-7f-5p	NM_001139847.1	Phosphatidic acid phosphatase type 2 domain-containing protein 1B (phosphatidic acid phosphatase type 2 domain-containing protein 1B isoform X2)	PPC1B ppc1b	729	22	-18.1	179
ssa-miR-1338-5p	NM_001139850.1	Microtubule-associated protein RP/EB family member 3	MARE3 mare3	1874	21	-25.5	339
ssa-miR-100a-2-3p	NM_001139851.1	Probable saccharopine dehydrogenase	SCPDH scpdh	620	23	-24.8	236
ssa-miR-222b-5p	NM_001139851.1	Probable saccharopine dehydrogenase	SCPDH scpdh	620	22	-29.6	514
ssa-miR-30c-d-1-3p	NM_001139851.1	Probable saccharopine dehydrogenase	SCPDH scpdh	620	22	-19	565
ssa-miR-30d-2-3p	NM_001139851.1	Probable saccharopine dehydrogenase	SCPDH scpdh	620	23	-22.1	564
ssa-let-7b-3p	NM_001139852.1	Interferon regulatory factor 5	IRF5 irf5	565	22	-23.6	220
ssa-let-7d-c-1-3p	NM_001139852.1	Interferon regulatory factor 5	IRF5 irf5	565	22	-19.3	220
ssa-miR-187-5p	NM_001139852.1	Interferon regulatory factor 5	IRF5 irf5	565	24	-27.6	375
ssa-miR-193a-5p	NM_001139852.1	Interferon regulatory factor 5	IRF5 irf5	565	21	-28.1	151
ssa-miR-29a-3p	NM_001139852.1	Interferon regulatory factor 5	IRF5 irf5	565	20	-21.3	433
ssa-miR-29b-3p	NM_001139852.1	Interferon regulatory factor 5	IRF5 irf5	565	22	-20.7	433
ssa-miR-29c-3p	NM_001139852.1	Interferon regulatory factor 5	IRF5 irf5	565	22	-21.4	433
ssa-miR-29de-3p	NM_001139852.1	Interferon regulatory factor 5	IRF5 irf5	565	20	-20.7	433
ssa-miR-456-3p	NM_001139852.1	Interferon regulatory factor 5	IRF5 irf5	565	22	-22.9	177
ssa-miR-462a-3p	NM_001139852.1	Interferon regulatory factor 5	IRF5 irf5	565	22	-27.5	179
ssa-miR-29c-5p	NM_001139854.1	Solute carrier family 25 member 40	S2540 s2540	1210	23	-19.8	723
ssa-miR-novel-2-3p	NM_001139854.1	Solute carrier family 25 member 40	S2540 s2540	1210	22	-22.2	160
ssa-miR-novel-5-3p	NM_001139854.1	Solute carrier family 25 member 40	S2540 s2540	1210	22	-21.4	583
ssa-miR-125b-3-3p	NM_001139855.1	Palmitoyltransferase (EC 2.3.1.225)	ZDHC6 zdhc6 zdhhc6	1125	22	-21.7	432
ssa-miR-146a-1-2-3p	NM_001139855.1	Palmitoyltransferase (EC 2.3.1.225)	ZDHC6 zdhc6 zdhhc6	1125	23	-25.2	773
ssa-miR-146a-3-3p	NM_001139855.1	Palmitoyltransferase (EC 2.3.1.225)	ZDHC6 zdhc6 zdhhc6	1125	22	-19.9	775
ssa-miR-146b-3p	NM_001139855.1	Palmitoyltransferase (EC 2.3.1.225)	ZDHC6 zdhc6 zdhhc6	1125	22	-19.5	775
ssa-miR-222b-5p	NM_001139855.1	Palmitoyltransferase (EC 2.3.1.225)	ZDHC6 zdhc6 zdhhc6	1125	22	-18.9	203
ssa-miR-26d-5p	NM_001139855.1	Palmitoyltransferase (EC 2.3.1.225)	ZDHC6 zdhc6 zdhhc6	1125	22	-21.5	851
ssa-miR-29b-1-5p	NM_001139855.1	Palmitoyltransferase (EC 2.3.1.225)	ZDHC6 zdhc6 zdhhc6	1125	23	-18.8	540
ssa-miR-novel-13-5p	NM_001139855.1	Palmitoyltransferase (EC 2.3.1.225)	ZDHC6 zdhc6 zdhhc6	1125	22	-20.3	616
ssa-let-7a-1-3-3p	NM_001139856.1	Acyl-coenzyme A thioesterase 5	ACOT5 acot5	1917	22	-20.8	1664
ssa-miR-125b-3-3p	NM_001139856.1	Acyl-coenzyme A thioesterase 5	ACOT5 acot5	1917	22	-23.1	1281
ssa-miR-1338-5p	NM_001139856.1	Acyl-coenzyme A thioesterase 5	ACOT5 acot5	1917	21	-20.4	934
ssa-miR-146a-1-2-3p	NM_001139856.1	Acyl-coenzyme A thioesterase 5	ACOT5 acot5	1917	23	-22.1	129
ssa-miR-146a-1-2-3p	NM_001139856.1	Acyl-coenzyme A thioesterase 5	ACOT5 acot5	1917	23	-19.3	893
ssa-miR-146a-3-3p	NM_001139856.1	Acyl-coenzyme A thioesterase 5	ACOT5 acot5	1917	22	-19.1	132
ssa-miR-146b-3p	NM_001139856.1	Acyl-coenzyme A thioesterase 5	ACOT5 acot5	1917	22	-21	132
ssa-miR-192a-1-3p	NM_001139856.1	Acyl-coenzyme A thioesterase 5	ACOT5 acot5	1917	22	-21.8	1552
ssa-miR-192b-5p	NM_001139856.1	Acyl-coenzyme A thioesterase 5	ACOT5 acot5	1917	22	-21.8	1552
ssa-miR-21b-3p	NM_001139856.1	Acyl-coenzyme A thioesterase 5	ACOT5 acot5	1917	22	-18.3	1228
ssa-miR-29b-3-5p	NM_001139856.1	Acyl-coenzyme A thioesterase 5	ACOT5 acot5	1917	23	-20.8	473
ssa-miR-30c-d-1-3p	NM_001139856.1	Acyl-coenzyme A thioesterase 5	ACOT5 acot5	1917	22	-28	560
ssa-miR-30d-2-3p	NM_001139856.1	Acyl-coenzyme A thioesterase 5	ACOT5 acot5	1917	23	-29.8	554
ssa-miR-727b-3p	NM_001139856.1	Acyl-coenzyme A thioesterase 5	ACOT5 acot5	1917	19	-18.7	1450
ssa-miR-8162-5p	NM_001139856.1	Acyl-coenzyme A thioesterase 5	ACOT5 acot5	1917	23	-28.1	1490
ssa-miR-1338-5p	NM_001139857.1	Pyridoxal phosphate phosphatase PHOSPHO2	PHOP2 phop2	1196	21	-21.1	390
ssa-miR-18b-3p	NM_001139857.1	Pyridoxal phosphate phosphatase PHOSPHO2	PHOP2 phop2	1196	24	-20	342
ssa-miR-200b-5p	NM_001139857.1	Pyridoxal phosphate phosphatase PHOSPHO2	PHOP2 phop2	1196	22	-21.5	615
ssa-miR-21a-2-3p	NM_001139857.1	Pyridoxal phosphate phosphatase PHOSPHO2	PHOP2 phop2	1196	22	-19.6	419
ssa-miR-21b-3p	NM_001139857.1	Pyridoxal phosphate phosphatase PHOSPHO2	PHOP2 phop2	1196	22	-19.8	402
ssa-miR-29e-5p	NM_001139857.1	Pyridoxal phosphate phosphatase PHOSPHO2	PHOP2 phop2	1196	23	-19.5	680
ssa-miR-10d-5p	NM_001139858.1	protein CREG2 precursor	CREG2 creg2	806	22	-19.1	67
ssa-miR-29c-5p	NM_001139858.1	protein CREG2 precursor	CREG2 creg2	806	23	-21.4	623
ssa-miR-29b-3-5p	NM_001139859.1	Lipase	LICH lich	852	23	-18.6	209
ssa-miR-7a-2-6-3p	NM_001139859.1	Lipase	LICH lich	852	22	-22.2	696
ssa-miR-8159-5p	NM_001139859.1	Lipase	LICH lich	852	24	-18.6	459
ssa-miR-459-3p	NM_001139860.1	Keratinocytes-associated transmembrane protein 2	KCT2 kct2	1479	22	-24.9	660
ssa-miR-143-3p	NM_001139861.1	protein SMG9 (protein SMG9 isoform X3)	smg9 cs061	594	21	-19.3	158
ssa-miR-122-5p	NM_001139862.1	YIF1A (protein YIF1A) (protein YIF1A isoform X1)	YIF1A yif1a	682	22	-25.5	386
ssa-miR-192a-5p	NM_001139863.1	Hematopoietically-expressed Homeobox protein hhex	HHEX hhex	1469	21	-22.4	1127
ssa-miR-727b-3p	NM_001139863.1	Hematopoietically-expressed Homeobox protein hhex	HHEX hhex	1469	19	-21.3	1298
ssa-miR-146a-1-2-3p	NM_001139864.1	U4/U6 small nuclear ribonucleoprotein Prp4 isoform X1	PRP4 prp4 prpf4	411	23	-22.1	22
ssa-miR-146a-3-3p	NM_001139864.1	U4/U6 small nuclear ribonucleoprotein Prp4 isoform X1	PRP4 prp4 prpf4	411	22	-19.6	7
ssa-miR-146b-3p	NM_001139864.1	U4/U6 small nuclear ribonucleoprotein Prp4 isoform X1	PRP4 prp4 prpf4	411	22	-19.1	23
ssa-miR-129-5p	NM_001139865.1	Calponin	CNN3 cnn3	1182	21	-26.7	60
ssa-miR-143-3p	NM_001139865.1	Calponin	CNN3 cnn3	1182	21	-18.5	920
ssa-miR-183-5p	NM_001139865.1	Calponin	CNN3 cnn3	1182	22	-20.8	1020
ssa-miR-221-5p	NM_001139865.1	Calponin	CNN3 cnn3	1182	23	-20.3	410
ssa-miR-novel-3-5p	NM_001139865.1	Calponin	CNN3 cnn3	1182	22	-18.2	683
ssa-miR-7a-2-6-3p	NM_001139866.1	Pescadillo homolog	pesc PES1 pes1	706	22	-19.7	339
ssa-miR-novel-2-3p	NM_001139866.1	Pescadillo homolog	pesc PES1 pes1	706	22	-20.8	363
ssa-miR-146d-1-3p	NM_001139867.1	Serine/threonine-protein kinase (EC 2.7.11.1)	PIM3 pim3	1485	22	-23.6	1264
ssa-miR-26d-5p	NM_001139867.1	Serine/threonine-protein kinase (EC 2.7.11.1)	PIM3 pim3	1485	22	-21.2	590
ssa-miR-7a-2-6-3p	NM_001139867.1	Serine/threonine-protein kinase (EC 2.7.11.1)	PIM3 pim3	1485	22	-18.3	947
ssa-miR-183-5p	NM_001139868.1	Splicing factor, proline-and glutamine-rich (splicing factor, proline- and glutamine-rich)	SFPQ sfpq	366	22	-19	256
ssa-miR-100a-2-3p	NM_001139869.1	Choline/ethanolaminephosphotransferase 1	CEPT1 cept1	1898	23	-20.2	1677
ssa-miR-21a-2-3p	NM_001139869.1	Choline/ethanolaminephosphotransferase 1	CEPT1 cept1	1898	22	-21.4	1229
ssa-miR-21b-3p	NM_001139869.1	Choline/ethanolaminephosphotransferase 1	CEPT1 cept1	1898	22	-21.4	1229
ssa-miR-731-5p	NM_001139869.1	Choline/ethanolaminephosphotransferase 1	CEPT1 cept1	1898	23	-19.4	557
ssa-miR-122-5p	NM_001139870.1	Syntaxin-3	STX3 stx3	1113	22	-21.4	420
ssa-miR-29a-5p	NM_001139870.1	Syntaxin-3	STX3 stx3	1113	23	-24.3	586
ssa-miR-29e-5p	NM_001139870.1	Syntaxin-3	STX3 stx3	1113	23	-25.2	586
ssa-miR-462a-3p	NM_001139870.1	Syntaxin-3	STX3 stx3	1113	22	-24.7	899
ssa-miR-727b-3p	NM_001139870.1	Syntaxin-3	STX3 stx3	1113	19	-20.1	430
ssa-miR-8162-5p	NM_001139870.1	Syntaxin-3	STX3 stx3	1113	23	-22.8	816
ssa-miR-727b-3p	NM_001139871.1	UDP-glucuronosyltransferase (EC 2.4.1.17)	UD2A2 ud2a2	343	19	-21.1	71
ssa-miR-novel-5-3p	NM_001139872.1	K0090 protein precursor (KIAA0090 homolog)	K0090 k0090	968	22	-20.9	220
ssa-miR-100a-2-3p	NM_001139873.1	Ubiquitin-like protein	UBL3 ubl3	1789	23	-21.3	1687
ssa-miR-146d-1-3p	NM_001139873.1	Ubiquitin-like protein	UBL3 ubl3	1789	22	-26.4	1555
ssa-miR-183-5p	NM_001139873.1	Ubiquitin-like protein	UBL3 ubl3	1789	22	-21.6	575
ssa-miR-27a-2-5p	NM_001139873.1	Ubiquitin-like protein	UBL3 ubl3	1789	25	-27.6	1152
ssa-miR-27d-1-5p	NM_001139873.1	Ubiquitin-like protein	UBL3 ubl3	1789	24	-22.2	1152
ssa-miR-727b-3p	NM_001139873.1	Ubiquitin-like protein	UBL3 ubl3	1789	19	-19.8	818
ssa-miR-novel-2-3p	NM_001139873.1	Ubiquitin-like protein	UBL3 ubl3	1789	22	-20.7	576
ssa-miR-10b-5p	NM_001139874.1	Small VCP/p97-interacting protein	SVIP svip	1387	22	-23.2	262
ssa-miR-10d-5p	NM_001139874.1	Small VCP/p97-interacting protein	SVIP svip	1387	22	-24.6	262
ssa-miR-26d-5p	NM_001139874.1	Small VCP/p97-interacting protein	SVIP svip	1387	22	-20.9	1196
ssa-miR-21b-3p	NM_001139875.1	Eukaryotic translation initiation factor 4H	IF4H if4h	1198	22	-18.5	496
ssa-miR-29b-1-5p	NM_001139875.1	Eukaryotic translation initiation factor 4H	IF4H if4h	1198	23	-24.2	649
ssa-miR-125b-3-3p	NM_001139877.1	Disabled homolog 2	DAB2 dab2	560	22	-24.5	121
ssa-miR-29b-1-5p	NM_001139877.1	Disabled homolog 2	DAB2 dab2	560	23	-19.2	318
ssa-miR-128-1-5p	NM_001139878.1	Fibroblast growth factor (FGF)	FGF13 fgf13	1730	23	-29	1108
ssa-miR-128-2-5p	NM_001139878.1	Fibroblast growth factor (FGF)	FGF13 fgf13	1730	23	-30.5	1108
ssa-miR-128-3-5p	NM_001139878.1	Fibroblast growth factor (FGF)	FGF13 fgf13	1730	23	-30.1	1108
ssa-miR-462a-3p	NM_001139878.1	Fibroblast growth factor (FGF)	FGF13 fgf13	1730	22	-35.7	1114
ssa-miR-731-5p	NM_001139878.1	Fibroblast growth factor (FGF)	FGF13 fgf13	1730	23	-19.8	1033
ssa-miR-731-5p	NM_001139878.1	Fibroblast growth factor (FGF)	FGF13 fgf13	1730	23	-18.1	445
ssa-miR-7a-2-6-3p	NM_001139878.1	Fibroblast growth factor (FGF)	FGF13 fgf13	1730	22	-21.3	1117
ssa-miR-30c-d-1-3p	NM_001139880.1	Ran GTPase-activating protein 1 (retrograde Golgi transport protein RGP1 homolog)	RGP1 rgp1	377	22	-18.4	237
ssa-miR-30d-2-3p	NM_001139880.1	Ran GTPase-activating protein 1 (retrograde Golgi transport protein RGP1 homolog)	RGP1 rgp1	377	23	-18.5	237
ssa-miR-192a-5p	NM_001139881.1	RAS guanyl-releasing protein 2	GRP2 grp2	2181	21	-22.3	291
ssa-miR-29a-5p	NM_001139881.1	RAS guanyl-releasing protein 2	GRP2 grp2	2181	23	-28	1365
ssa-miR-29e-5p	NM_001139881.1	RAS guanyl-releasing protein 2	GRP2 grp2	2181	23	-32.1	1365
ssa-miR-459-3p	NM_001139881.1	RAS guanyl-releasing protein 2	GRP2 grp2	2181	22	-18.8	423
ssa-miR-731-5p	NM_001139881.1	RAS guanyl-releasing protein 2	GRP2 grp2	2181	23	-20.2	760
ssa-miR-21a-2-3p	NM_001139882.1	cleavage and polyadenylation specificity factor subunit 3	CPSF3 cpsf3	473	22	-19.5	178
ssa-miR-21b-3p	NM_001139882.1	cleavage and polyadenylation specificity factor subunit 3	CPSF3 cpsf3	473	22	-21.9	178
ssa-let-7a-1-3-3p	NM_001139883.1	NEDD8-activating enzyme E1 regulatory subunit	ULA1 ula1	965	22	-18.1	359
ssa-miR-187-5p	NM_001139883.1	NEDD8-activating enzyme E1 regulatory subunit	ULA1 ula1	965	24	-25.2	923
ssa-miR-187-5p	NM_001139883.1	NEDD8-activating enzyme E1 regulatory subunit	ULA1 ula1	965	24	-22.5	50
ssa-miR-30c-d-1-3p	NM_001139883.1	NEDD8-activating enzyme E1 regulatory subunit	ULA1 ula1	965	22	-21.9	76
ssa-miR-30d-2-3p	NM_001139883.1	NEDD8-activating enzyme E1 regulatory subunit	ULA1 ula1	965	23	-22.2	72
ssa-miR-29a-5p	NM_001139884.1	Solute carrier family 22 member 6-A	S226A s226a	679	23	-23.3	121
ssa-miR-29e-5p	NM_001139884.1	Solute carrier family 22 member 6-A	S226A s226a	679	23	-21.7	121
ssa-let-7a-1-3-3p	NM_001139885.1	C3orf58 (CC058 protein precursor)	CC058 cc058	585	22	-29.2	136
ssa-miR-222b-5p	NM_001139885.1	C3orf58 (CC058 protein precursor)	CC058 cc058	585	22	-24.3	261
ssa-miR-27a-3-5p	NM_001139885.1	C3orf58 (CC058 protein precursor)	CC058 cc058	585	24	-22.3	33
ssa-miR-27d-2-5p	NM_001139885.1	C3orf58 (CC058 protein precursor)	CC058 cc058	585	23	-21.8	33
ssa-miR-187-5p	NM_001139886.1	DNA polymerase delta subunit 3 isoform X1 (DNA polymerase subunit delta-3)	DPOD3 dpod3 pold3	706	24	-18.1	474
ssa-miR-29a-3p	NM_001139887.1	C4orf29 homolog (CD029 protein)	CD029 cd029	837	20	-19.8	147
ssa-miR-29b-3p	NM_001139887.1	C4orf29 homolog (CD029 protein)	CD029 cd029	837	22	-19.8	147
ssa-miR-29c-3p	NM_001139887.1	C4orf29 homolog (CD029 protein)	CD029 cd029	837	22	-19.8	147
ssa-miR-29de-3p	NM_001139887.1	C4orf29 homolog (CD029 protein)	CD029 cd029	837	20	-21.7	142
ssa-miR-novel-5-5p	NM_001139887.1	C4orf29 homolog (CD029 protein)	CD029 cd029	837	22	-19.1	497
ssa-miR-100a-2-3p	NM_001139888.1	RUN and FYVE domain-containing protein 2	RUFY2 rufy2	940	23	-23.1	568
ssa-miR-18c-3p	NM_001139888.1	RUN and FYVE domain-containing protein 2	RUFY2 rufy2	940	22	-20.3	547
ssa-miR-222b-5p	NM_001139888.1	RUN and FYVE domain-containing protein 2	RUFY2 rufy2	940	22	-23.7	545
ssa-let-7a-1-3-3p	NM_001139889.1	Gamma-aminobutyric acid receptor subunit delta	GBRD gbrd	860	22	-20	28
ssa-miR-8158-3p	NM_001139889.1	Gamma-aminobutyric acid receptor subunit delta	GBRD gbrd	860	23	-18.4	226
ssa-let-7e-5p	NM_001139890.1	60 kDa lysophospholipase	LPP60 lpp60	1086	22	-19.7	550
ssa-let-7f-5p	NM_001139890.1	60 kDa lysophospholipase	LPP60 lpp60	1086	22	-19.8	542
ssa-miR-143-3p	NM_001139890.1	60 kDa lysophospholipase	LPP60 lpp60	1086	21	-23.7	824
ssa-miR-183-5p	NM_001139890.1	60 kDa lysophospholipase	LPP60 lpp60	1086	22	-19.1	462
ssa-miR-192a-1-3p	NM_001139890.1	60 kDa lysophospholipase	LPP60 lpp60	1086	22	-18.7	824
ssa-miR-21a-2-3p	NM_001139890.1	60 kDa lysophospholipase	LPP60 lpp60	1086	22	-23	870
ssa-miR-21b-3p	NM_001139890.1	60 kDa lysophospholipase	LPP60 lpp60	1086	22	-23	870
ssa-miR-29d-5p	NM_001139890.1	60 kDa lysophospholipase	LPP60 lpp60	1086	23	-22.5	1006
ssa-miR-novel-2-3p	NM_001139890.1	60 kDa lysophospholipase	LPP60 lpp60	1086	22	-21.3	60
ssa-miR-novel-5-3p	NM_001139891.1	Phosphoacetylglucosamine mutase (PAGM) (EC 5.4.2.3) (Acetylglucosamine phosphomutase) (N-acetylglucosamine-phosphate mutase)	AGM1 agm1	488	22	-23.2	74
ssa-let-7a-1-3-3p	NM_001139892.1	FAM76B	FA76B fa76b	1114	22	-24	128
ssa-miR-183-5p	NM_001139892.1	FAM76B	FA76B fa76b	1114	22	-22.7	738
ssa-miR-192a-1-3p	NM_001139893.1	Zinc finger protein 313	ZN313 zn313	1057	22	-18.2	526
ssa-miR-192b-5p	NM_001139893.1	Zinc finger protein 313	ZN313 zn313	1057	22	-23.4	526
ssa-miR-459-3p	NM_001139893.1	Zinc finger protein 313	ZN313 zn313	1057	22	-18.3	755
ssa-miR-462a-5p	NM_001139893.1	Zinc finger protein 313	ZN313 zn313	1057	23	-23.6	543
ssa-miR-8162-5p	NM_001139893.1	Zinc finger protein 313	ZN313 zn313	1057	23	-18.6	763
ssa-miR-10b-5p	NM_001139895.1	Xaa-Pro aminopeptidase 3 (xaa-Pro aminopeptidase 3 isoform X1)	XPP3 xpp3	434	22	-19.6	153
ssa-miR-10d-5p	NM_001139895.1	Xaa-Pro aminopeptidase 3 (xaa-Pro aminopeptidase 3 isoform X1)	XPP3 xpp3	434	22	-19.7	153
ssa-miR-122-5p	NM_001139895.1	Xaa-Pro aminopeptidase 3 (xaa-Pro aminopeptidase 3 isoform X1)	XPP3 xpp3	434	22	-23.5	52
ssa-miR-146a-1-2-3p	NM_001139895.1	Xaa-Pro aminopeptidase 3 (xaa-Pro aminopeptidase 3 isoform X1)	XPP3 xpp3	434	23	-20.2	380
ssa-miR-146a-3-3p	NM_001139895.1	Xaa-Pro aminopeptidase 3 (xaa-Pro aminopeptidase 3 isoform X1)	XPP3 xpp3	434	22	-22.9	383
ssa-miR-146b-3p	NM_001139895.1	Xaa-Pro aminopeptidase 3 (xaa-Pro aminopeptidase 3 isoform X1)	XPP3 xpp3	434	22	-19.9	383
ssa-miR-193a-5p	NM_001139895.1	Xaa-Pro aminopeptidase 3 (xaa-Pro aminopeptidase 3 isoform X1)	XPP3 xpp3	434	21	-21.5	364
ssa-miR-novel-2-3p	NM_001139895.1	Xaa-Pro aminopeptidase 3 (xaa-Pro aminopeptidase 3 isoform X1)	XPP3 xpp3	434	22	-21.3	387
ssa-miR-26d-5p	NM_001139898.1	Alanine aminotransferase 2-like	ALAT2 alat2	626	22	-18.5	307
ssa-miR-29b-1-5p	NM_001139898.1	Alanine aminotransferase 2-like	ALAT2 alat2	626	23	-18.5	224
ssa-miR-731-5p	NM_001139898.1	Alanine aminotransferase 2-like	ALAT2 alat2	626	23	-19.3	360
ssa-miR-8162-5p	NM_001139898.1	Alanine aminotransferase 2-like	ALAT2 alat2	626	23	-19.3	263
ssa-miR-novel-2-3p	NM_001139898.1	Alanine aminotransferase 2-like	ALAT2 alat2	626	22	-18.4	482
ssa-miR-21a-2-3p	NM_001139899.1	Tripartite motif-containing protein 13 (tripartite motif-containing protein 13 isoform X2)	TRI13 tri13	629	22	-24.9	511
ssa-miR-21a-2-3p	NM_001139899.1	Tripartite motif-containing protein 13 (tripartite motif-containing protein 13 isoform X2)	TRI13 tri13	629	22	-22.8	261
ssa-miR-21b-3p	NM_001139899.1	Tripartite motif-containing protein 13 (tripartite motif-containing protein 13 isoform X2)	TRI13 tri13	629	22	-27	520
ssa-miR-21b-3p	NM_001139899.1	Tripartite motif-containing protein 13 (tripartite motif-containing protein 13 isoform X2)	TRI13 tri13	629	22	-22.8	261
ssa-miR-456-3p	NM_001139899.1	Tripartite motif-containing protein 13 (tripartite motif-containing protein 13 isoform X2)	TRI13 tri13	629	22	-27.7	545
ssa-miR-novel-5-5p	NM_001139899.1	Tripartite motif-containing protein 13 (tripartite motif-containing protein 13 isoform X2)	TRI13 tri13	629	22	-22.9	523
ssa-miR-21a-2-3p	NM_001139900.1	FAM110A (FAM110A isoform X1)	F110A f110a	485	22	-18.5	149
ssa-miR-21b-3p	NM_001139900.1	FAM110A (FAM110A isoform X1)	F110A f110a	485	22	-19.5	134
ssa-miR-8159-5p	NM_001139900.1	FAM110A (FAM110A isoform X1)	F110A f110a	485	24	-18.4	379
ssa-miR-7a-2-6-3p	NM_001139902.1	Nuclear receptor coactivator 5	NCOA5 ncoa5	494	22	-20.6	299
ssa-miR-30a-3-4-3p	NM_001139903.1	C14orf130 (CN130 protein)	CN130 cn130	786	22	-30.4	1
ssa-miR-731-3p	NM_001139903.1	C14orf130 (CN130 protein)	CN130 cn130	786	22	-22.2	14
ssa-miR-221-5p	NM_001139904.1	Major facilitator superfamily domain-containing protein 2	MFSD2 mfsd2	550	23	-20.8	62
ssa-miR-29d-5p	NM_001139904.1	Major facilitator superfamily domain-containing protein 2	MFSD2 mfsd2	550	23	-27.1	408
ssa-miR-456-3p	NM_001139904.1	Major facilitator superfamily domain-containing protein 2	MFSD2 mfsd2	550	22	-25.8	10
ssa-miR-8159-5p	NM_001139904.1	Major facilitator superfamily domain-containing protein 2	MFSD2 mfsd2	550	24	-20.4	247
ssa-miR-100a-2-3p	NM_001139906.1	HCLS1-associated protein X-1	HAX1 hax1	1313	23	-20.8	152
ssa-miR-27a-2-5p	NM_001139906.1	HCLS1-associated protein X-1	HAX1 hax1	1313	25	-20.3	508
ssa-miR-27a-3-5p	NM_001139906.1	HCLS1-associated protein X-1	HAX1 hax1	1313	24	-20	508
ssa-miR-27d-1-5p	NM_001139906.1	HCLS1-associated protein X-1	HAX1 hax1	1313	24	-21.6	508
ssa-miR-27d-2-5p	NM_001139906.1	HCLS1-associated protein X-1	HAX1 hax1	1313	23	-21.3	508
ssa-miR-731-5p	NM_001139906.1	HCLS1-associated protein X-1	HAX1 hax1	1313	23	-18.5	668
ssa-miR-146d-1-3p	NM_001139907.1	Tyrosine-protein kinase (EC 2.7.10.2)	LCK lck	509	22	-20.8	312
ssa-miR-21a-1-3p	NM_001139907.1	Tyrosine-protein kinase (EC 2.7.10.2)	LCK lck	509	21	-24.5	220
ssa-miR-462a-5p	NM_001139907.1	Tyrosine-protein kinase (EC 2.7.10.2)	LCK lck	509	23	-18	225
ssa-miR-25-1-2-5p	NM_001139908.1	Double-strand break repair protein	MRE11 mre11	440	23	-20.5	5
ssa-miR-183-5p	NM_001139909.1	PolyrC-binding protein 2 (poly(RC)-binding protein 2)	PCBP2 pcbp2	1334	22	-19.4	803
ssa-miR-27a-3-5p	NM_001139909.1	PolyrC-binding protein 2 (poly(RC)-binding protein 2)	PCBP2 pcbp2	1334	24	-18.4	218
ssa-miR-8158-3p	NM_001139909.1	PolyrC-binding protein 2 (poly(RC)-binding protein 2)	PCBP2 pcbp2	1334	23	-18.3	661
ssa-miR-29b-3-5p	NM_001139910.1	U3 small nucleolar RNA-associated protein 18 homolog	UTP18 utp18	338	23	-24.2	97
ssa-miR-18b-3p	NM_001139911.1	Zinc finger and BTB domain-containing protein 17	ZBT17 zbt17	654	24	-22.8	250
ssa-miR-30d-2-3p	NM_001139911.1	Zinc finger and BTB domain-containing protein 17	ZBT17 zbt17	654	23	-18.2	603
ssa-miR-novel-5-5p	NM_001139911.1	Zinc finger and BTB domain-containing protein 17	ZBT17 zbt17	654	22	-25.1	286
ssa-miR-129-5p	NM_001139912.1	40S ribosomal protein S2 (Ribosomal protein S2)	rps2 LOC106601815 LOC106606617 RS2 rs2	1558	21	-20.4	947
ssa-miR-18b-3p	NM_001139912.1	40S ribosomal protein S2 (Ribosomal protein S2)	rps2 LOC106601815 LOC106606617 RS2 rs2	1558	24	-22.7	932
ssa-miR-7a-2-6-3p	NM_001139912.1	40S ribosomal protein S2 (Ribosomal protein S2)	rps2 LOC106601815 LOC106606617 RS2 rs2	1558	22	-24.1	653
ssa-miR-novel-2-3p	NM_001139912.1	40S ribosomal protein S2 (Ribosomal protein S2)	rps2 LOC106601815 LOC106606617 RS2 rs2	1558	22	-18.1	1080
ssa-miR-novel-5-5p	NM_001139912.1	40S ribosomal protein S2 (Ribosomal protein S2)	rps2 LOC106601815 LOC106606617 RS2 rs2	1558	22	-19	28
ssa-miR-183-5p	NM_001139913.1	CCAAT/enhancer-binding protein	CEBPB cebpb	531	22	-22.1	69
ssa-miR-10b-5p	NM_001139914.1	CD226 antigen (CD226 antigen precursor)	CD226 cd226	1302	22	-26.8	804
ssa-miR-10d-5p	NM_001139914.1	CD226 antigen (CD226 antigen precursor)	CD226 cd226	1302	22	-26.9	804
ssa-miR-129-5p	NM_001139914.1	CD226 antigen (CD226 antigen precursor)	CD226 cd226	1302	21	-19.5	760
ssa-miR-146a-1-2-3p	NM_001139914.1	CD226 antigen (CD226 antigen precursor)	CD226 cd226	1302	23	-19	596
ssa-miR-184-3p	NM_001139915.1	cAMP-responsive element-binding protein-like 2	CRBL2 crbl2 LOC106594675 LOC106598687	2112	22	-28.4	245
ssa-miR-18b-3p	NM_001139915.1	cAMP-responsive element-binding protein-like 2	CRBL2 crbl2 LOC106594675 LOC106598687	2112	24	-25.9	1294
ssa-miR-18b-3p	NM_001139915.1	cAMP-responsive element-binding protein-like 2	CRBL2 crbl2 LOC106594675 LOC106598687	2112	24	-25.2	1347
ssa-miR-18b-3p	NM_001139915.1	cAMP-responsive element-binding protein-like 2	CRBL2 crbl2 LOC106594675 LOC106598687	2112	24	-25.2	1395
ssa-miR-18b-3p	NM_001139915.1	cAMP-responsive element-binding protein-like 2	CRBL2 crbl2 LOC106594675 LOC106598687	2112	24	-25.2	1443
ssa-miR-18b-3p	NM_001139915.1	cAMP-responsive element-binding protein-like 2	CRBL2 crbl2 LOC106594675 LOC106598687	2112	24	-25.2	1491
ssa-miR-2184-3p	NM_001139915.1	cAMP-responsive element-binding protein-like 2	CRBL2 crbl2 LOC106594675 LOC106598687	2112	22	-21.2	1006
ssa-miR-26a-3-3p	NM_001139915.1	cAMP-responsive element-binding protein-like 2	CRBL2 crbl2 LOC106594675 LOC106598687	2112	22	-18.5	1883
ssa-miR-18c-3p	NM_001139916.1	Filamin-binding LIM protein 1	FBLI1 fbli1	1146	22	-22.8	593
ssa-miR-25-1-2-5p	NM_001139916.1	Filamin-binding LIM protein 1	FBLI1 fbli1	1146	23	-25.6	267
ssa-miR-29d-5p	NM_001139916.1	Filamin-binding LIM protein 1	FBLI1 fbli1	1146	23	-23.5	653
ssa-miR-8159-5p	NM_001139916.1	Filamin-binding LIM protein 1	FBLI1 fbli1	1146	24	-21.4	421
ssa-let-7a-1-3-3p	NM_001139919.1	Golgi pH regulator	gpr89 gphr	766	22	-19.5	611
ssa-miR-29b-1-5p	NM_001139919.1	Golgi pH regulator	gpr89 gphr	766	23	-19.3	299
ssa-miR-456-3p	NM_001139919.1	Golgi pH regulator	gpr89 gphr	766	22	-22.6	616
ssa-miR-122-5p	NM_001139920.1	Cysteinyl-tRNA synthetase, cytoplasmic	SYCC sycc	1666	22	-20.8	1110
ssa-miR-143-3p	NM_001139920.1	Cysteinyl-tRNA synthetase, cytoplasmic	SYCC sycc	1666	21	-18.7	390
ssa-miR-146d-1-3p	NM_001139920.1	Cysteinyl-tRNA synthetase, cytoplasmic	SYCC sycc	1666	22	-25.8	836
ssa-miR-187-5p	NM_001139920.1	Cysteinyl-tRNA synthetase, cytoplasmic	SYCC sycc	1666	24	-23.8	465
ssa-miR-25-1-2-5p	NM_001139920.1	Cysteinyl-tRNA synthetase, cytoplasmic	SYCC sycc	1666	23	-30.2	177
ssa-miR-29a-5p	NM_001139920.1	Cysteinyl-tRNA synthetase, cytoplasmic	SYCC sycc	1666	23	-18.6	734
ssa-miR-459-3p	NM_001139920.1	Cysteinyl-tRNA synthetase, cytoplasmic	SYCC sycc	1666	22	-18.6	265
ssa-miR-727b-3p	NM_001139920.1	Cysteinyl-tRNA synthetase, cytoplasmic	SYCC sycc	1666	19	-24.8	702
ssa-miR-183-5p	NM_001139921.1	Caspase 3B (Caspase-3)	casp3 CASP3	1208	22	-18	1073
ssa-miR-8162-5p	NM_001139921.1	Caspase 3B (Caspase-3)	casp3 CASP3	1208	23	-18	285
ssa-miR-30c-d-1-3p	NM_001139922.1	AKT-interacting protein	aktip fts	853	22	-23.3	513
ssa-miR-30d-2-3p	NM_001139922.1	AKT-interacting protein	aktip fts	853	23	-23.4	513
ssa-miR-29a-5p	NM_001139923.1	Beta-catenin-interacting protein 1	CNBP1 cnbp1	2052	23	-18.5	1299
ssa-miR-462a-3p	NM_001139923.1	Beta-catenin-interacting protein 1	CNBP1 cnbp1	2052	22	-20.2	151
ssa-miR-146a-1-2-3p	NM_001139924.1	N-acylneuraminate cytidylyltransferase (EC 2.7.7.43)	NEUA neua	1128	23	-22.5	691
ssa-miR-146a-3-3p	NM_001139924.1	N-acylneuraminate cytidylyltransferase (EC 2.7.7.43)	NEUA neua	1128	22	-19.9	690
ssa-miR-146b-3p	NM_001139924.1	N-acylneuraminate cytidylyltransferase (EC 2.7.7.43)	NEUA neua	1128	22	-19.9	690
ssa-miR-26d-5p	NM_001139924.1	N-acylneuraminate cytidylyltransferase (EC 2.7.7.43)	NEUA neua	1128	22	-21.2	903
ssa-miR-27a-2-5p	NM_001139924.1	N-acylneuraminate cytidylyltransferase (EC 2.7.7.43)	NEUA neua	1128	25	-27.5	449
ssa-miR-27a-3-5p	NM_001139924.1	N-acylneuraminate cytidylyltransferase (EC 2.7.7.43)	NEUA neua	1128	24	-27.2	449
ssa-miR-27d-1-5p	NM_001139924.1	N-acylneuraminate cytidylyltransferase (EC 2.7.7.43)	NEUA neua	1128	24	-22.9	461
ssa-miR-27d-2-5p	NM_001139924.1	N-acylneuraminate cytidylyltransferase (EC 2.7.7.43)	NEUA neua	1128	23	-22.6	461
ssa-let-7e-5p	NM_001139925.1	Retrovirus-related Pol polyprotein from transposon 17.6 (retrovirus-related Pol polyprotein from transposon 17.6 isoform X3)	POL3 pol3	1831	22	-21.8	101
ssa-let-7f-5p	NM_001139925.1	Retrovirus-related Pol polyprotein from transposon 17.6 (retrovirus-related Pol polyprotein from transposon 17.6 isoform X3)	POL3 pol3	1831	22	-22.1	98
ssa-miR-10b-5p	NM_001139925.1	Retrovirus-related Pol polyprotein from transposon 17.6 (retrovirus-related Pol polyprotein from transposon 17.6 isoform X3)	POL3 pol3	1831	22	-18.1	1221
ssa-miR-10d-5p	NM_001139925.1	Retrovirus-related Pol polyprotein from transposon 17.6 (retrovirus-related Pol polyprotein from transposon 17.6 isoform X3)	POL3 pol3	1831	22	-18.2	1221
ssa-miR-129-5p	NM_001139925.1	Retrovirus-related Pol polyprotein from transposon 17.6 (retrovirus-related Pol polyprotein from transposon 17.6 isoform X3)	POL3 pol3	1831	21	-21.3	1785
ssa-miR-129-5p	NM_001139925.1	Retrovirus-related Pol polyprotein from transposon 17.6 (retrovirus-related Pol polyprotein from transposon 17.6 isoform X3)	POL3 pol3	1831	21	-20.4	833
ssa-miR-192a-1-3p	NM_001139925.1	Retrovirus-related Pol polyprotein from transposon 17.6 (retrovirus-related Pol polyprotein from transposon 17.6 isoform X3)	POL3 pol3	1831	22	-27.7	894
ssa-miR-192b-5p	NM_001139925.1	Retrovirus-related Pol polyprotein from transposon 17.6 (retrovirus-related Pol polyprotein from transposon 17.6 isoform X3)	POL3 pol3	1831	22	-27.7	894
ssa-miR-200b-5p	NM_001139925.1	Retrovirus-related Pol polyprotein from transposon 17.6 (retrovirus-related Pol polyprotein from transposon 17.6 isoform X3)	POL3 pol3	1831	22	-20	1663
ssa-miR-29b-1-5p	NM_001139925.1	Retrovirus-related Pol polyprotein from transposon 17.6 (retrovirus-related Pol polyprotein from transposon 17.6 isoform X3)	POL3 pol3	1831	23	-18.9	134
ssa-miR-8159-3p	NM_001139925.1	Retrovirus-related Pol polyprotein from transposon 17.6 (retrovirus-related Pol polyprotein from transposon 17.6 isoform X3)	POL3 pol3	1831	21	-30.2	918
ssa-miR-122-5p	NM_001139927.1	Glucagon family neuropeptides	PACA paca	1549	22	-24.5	619
ssa-miR-129-5p	NM_001139927.1	Glucagon family neuropeptides	PACA paca	1549	21	-19.9	1507
ssa-miR-727b-3p	NM_001139927.1	Glucagon family neuropeptides	PACA paca	1549	19	-27.4	1134
ssa-miR-143-3p	NM_001139928.1	Metallophosphoesterase domain-containing protein 2 (metallophosphoesterase domain-containing protein 2 isoform X1)	MPPD2 mppd2	1100	21	-27.1	476
ssa-miR-143-3p	NM_001139928.1	Metallophosphoesterase domain-containing protein 2 (metallophosphoesterase domain-containing protein 2 isoform X1)	MPPD2 mppd2	1100	21	-21.7	782
ssa-miR-29c-5p	NM_001139928.1	Metallophosphoesterase domain-containing protein 2 (metallophosphoesterase domain-containing protein 2 isoform X1)	MPPD2 mppd2	1100	23	-19.5	687
ssa-miR-132-1-2-5p	NM_001139929.1	Sideroflexin-4	SFXN4 sfxn4	1121	22	-26.3	85
ssa-miR-192a-1-3p	NM_001139929.1	Sideroflexin-4	SFXN4 sfxn4	1121	22	-23.9	701
ssa-miR-192b-5p	NM_001139929.1	Sideroflexin-4	SFXN4 sfxn4	1121	22	-20.1	701
ssa-miR-125a-1-3p	NM_001139930.1	Ras-related protein Rab-6C	RAB6C rab6c	1948	22	-27	695
ssa-miR-183-5p	NM_001139930.1	Ras-related protein Rab-6C	RAB6C rab6c	1948	22	-24.3	307
ssa-miR-26a-3-3p	NM_001139930.1	Ras-related protein Rab-6C	RAB6C rab6c	1948	22	-21.4	596
ssa-miR-8159-5p	NM_001139930.1	Ras-related protein Rab-6C	RAB6C rab6c	1948	24	-19.6	456
ssa-let-7a-1-3-3p	NM_001139931.1	CCAAT/enhancer-binding protein	CEBPA C/EBPalpha cebpa	914	22	-21.4	140
ssa-miR-129-5p	NM_001139931.1	CCAAT/enhancer-binding protein	CEBPA C/EBPalpha cebpa	914	21	-20.2	286
ssa-miR-18c-3p	NM_001139931.1	CCAAT/enhancer-binding protein	CEBPA C/EBPalpha cebpa	914	22	-21.5	130
ssa-miR-192a-1-3p	NM_001139931.1	CCAAT/enhancer-binding protein	CEBPA C/EBPalpha cebpa	914	22	-21.9	71
ssa-miR-192b-5p	NM_001139931.1	CCAAT/enhancer-binding protein	CEBPA C/EBPalpha cebpa	914	22	-26.2	78
ssa-miR-novel-5-5p	NM_001139931.1	CCAAT/enhancer-binding protein	CEBPA C/EBPalpha cebpa	914	22	-18.5	379
ssa-miR-125b-3-3p	NM_001139932.1	72 kDa type IV collagenase precursor (EC 3.4.24.24)	MMP2 mmp2	956	22	-23.8	309
ssa-miR-29a-3p	NM_001139932.1	72 kDa type IV collagenase precursor (EC 3.4.24.24)	MMP2 mmp2	956	20	-20.3	489
ssa-miR-29b-3p	NM_001139932.1	72 kDa type IV collagenase precursor (EC 3.4.24.24)	MMP2 mmp2	956	22	-21.6	492
ssa-miR-29c-3p	NM_001139932.1	72 kDa type IV collagenase precursor (EC 3.4.24.24)	MMP2 mmp2	956	22	-21.6	492
ssa-miR-29de-3p	NM_001139932.1	72 kDa type IV collagenase precursor (EC 3.4.24.24)	MMP2 mmp2	956	20	-19.1	489
ssa-miR-456-3p	NM_001139932.1	72 kDa type IV collagenase precursor (EC 3.4.24.24)	MMP2 mmp2	956	22	-27.3	43
ssa-let-7b-3p	NM_001139933.1	ubiquitin carboxyl-terminal hydrolase 12 (EC 3.4.19.12) (ubiquitin carboxyl-terminal hydrolase 12 isoform X1)	ubp12 usp12	764	22	-27.2	268
ssa-let-7d-c-1-3p	NM_001139933.1	ubiquitin carboxyl-terminal hydrolase 12 (EC 3.4.19.12) (ubiquitin carboxyl-terminal hydrolase 12 isoform X1)	ubp12 usp12	764	22	-32.5	268
ssa-let-7e-5p	NM_001139933.1	ubiquitin carboxyl-terminal hydrolase 12 (EC 3.4.19.12) (ubiquitin carboxyl-terminal hydrolase 12 isoform X1)	ubp12 usp12	764	22	-18.3	127
ssa-miR-8162-5p	NM_001139933.1	ubiquitin carboxyl-terminal hydrolase 12 (EC 3.4.19.12) (ubiquitin carboxyl-terminal hydrolase 12 isoform X1)	ubp12 usp12	764	23	-20.4	473
ssa-miR-novel-5-5p	NM_001139933.1	ubiquitin carboxyl-terminal hydrolase 12 (EC 3.4.19.12) (ubiquitin carboxyl-terminal hydrolase 12 isoform X1)	ubp12 usp12	764	22	-22.3	611
ssa-miR-146a-1-2-3p	NM_001139934.1	Methyl-CpG-binding domain protein 3	MBD3 mbd3	1258	23	-18.4	1114
ssa-miR-146a-3-3p	NM_001139934.1	Methyl-CpG-binding domain protein 3	MBD3 mbd3	1258	22	-19	1114
ssa-miR-146b-3p	NM_001139934.1	Methyl-CpG-binding domain protein 3	MBD3 mbd3	1258	22	-19.6	1114
ssa-miR-200b-5p	NM_001139934.1	Methyl-CpG-binding domain protein 3	MBD3 mbd3	1258	22	-19.6	540
ssa-miR-29a-3p	NM_001139934.1	Methyl-CpG-binding domain protein 3	MBD3 mbd3	1258	20	-22.8	769
ssa-miR-29a-3p	NM_001139934.1	Methyl-CpG-binding domain protein 3	MBD3 mbd3	1258	20	-21.5	697
ssa-miR-29b-1-5p	NM_001139934.1	Methyl-CpG-binding domain protein 3	MBD3 mbd3	1258	23	-22.8	588
ssa-miR-29b-2-5p	NM_001139934.1	Methyl-CpG-binding domain protein 3	MBD3 mbd3	1258	25	-26	588
ssa-miR-29b-3p	NM_001139934.1	Methyl-CpG-binding domain protein 3	MBD3 mbd3	1258	22	-23.5	762
ssa-miR-29b-3p	NM_001139934.1	Methyl-CpG-binding domain protein 3	MBD3 mbd3	1258	22	-22.9	700
ssa-miR-29b-3p	NM_001139934.1	Methyl-CpG-binding domain protein 3	MBD3 mbd3	1258	22	-18.5	285
ssa-miR-29c-3p	NM_001139934.1	Methyl-CpG-binding domain protein 3	MBD3 mbd3	1258	22	-22.8	769
ssa-miR-29c-3p	NM_001139934.1	Methyl-CpG-binding domain protein 3	MBD3 mbd3	1258	22	-21.5	697
ssa-miR-29c-3p	NM_001139934.1	Methyl-CpG-binding domain protein 3	MBD3 mbd3	1258	22	-19.2	285
ssa-miR-29de-3p	NM_001139934.1	Methyl-CpG-binding domain protein 3	MBD3 mbd3	1258	20	-22	697
ssa-miR-29de-3p	NM_001139934.1	Methyl-CpG-binding domain protein 3	MBD3 mbd3	1258	20	-20.9	769
ssa-miR-29de-3p	NM_001139934.1	Methyl-CpG-binding domain protein 3	MBD3 mbd3	1258	20	-20.2	299
ssa-miR-731-5p	NM_001139935.1	RWD domain-containing protein 4A	RWDD4 rwdd4	850	23	-23.4	436
ssa-miR-731-5p	NM_001139935.1	RWD domain-containing protein 4A	RWDD4 rwdd4	850	23	-22.1	223
ssa-miR-125a-2-3-3p	NM_001139936.1	RAB6A, member RAS oncogene family (Ras-related protein Rab-6A)	RAB6A rab6a	1574	22	-21.3	183
ssa-miR-125a-4-3p	NM_001139936.1	RAB6A, member RAS oncogene family (Ras-related protein Rab-6A)	RAB6A rab6a	1574	22	-21.1	192
ssa-miR-146a-1-2-3p	NM_001139936.1	RAB6A, member RAS oncogene family (Ras-related protein Rab-6A)	RAB6A rab6a	1574	23	-29.8	388
ssa-miR-146a-3-3p	NM_001139936.1	RAB6A, member RAS oncogene family (Ras-related protein Rab-6A)	RAB6A rab6a	1574	22	-22.8	393
ssa-miR-146b-3p	NM_001139936.1	RAB6A, member RAS oncogene family (Ras-related protein Rab-6A)	RAB6A rab6a	1574	22	-19.8	393
ssa-miR-146d-1-3p	NM_001139936.1	RAB6A, member RAS oncogene family (Ras-related protein Rab-6A)	RAB6A rab6a	1574	22	-22.6	952
ssa-miR-18c-3p	NM_001139936.1	RAB6A, member RAS oncogene family (Ras-related protein Rab-6A)	RAB6A rab6a	1574	22	-20.6	663
ssa-miR-29a-5p	NM_001139936.1	RAB6A, member RAS oncogene family (Ras-related protein Rab-6A)	RAB6A rab6a	1574	23	-20.5	596
ssa-miR-29c-5p	NM_001139936.1	RAB6A, member RAS oncogene family (Ras-related protein Rab-6A)	RAB6A rab6a	1574	23	-19.3	1240
ssa-miR-29e-5p	NM_001139936.1	RAB6A, member RAS oncogene family (Ras-related protein Rab-6A)	RAB6A rab6a	1574	23	-24.9	595
ssa-miR-30c-d-1-3p	NM_001139936.1	RAB6A, member RAS oncogene family (Ras-related protein Rab-6A)	RAB6A rab6a	1574	22	-18.9	1473
ssa-miR-30d-2-3p	NM_001139936.1	RAB6A, member RAS oncogene family (Ras-related protein Rab-6A)	RAB6A rab6a	1574	23	-20.5	1470
ssa-miR-456-3p	NM_001139936.1	RAB6A, member RAS oncogene family (Ras-related protein Rab-6A)	RAB6A rab6a	1574	22	-30	144
ssa-miR-10b-5p	NM_001139937.1	Ubiquitin-conjugating enzyme E2 R2	UB2R2 ub2r2	1260	22	-19.5	818
ssa-miR-10d-5p	NM_001139937.1	Ubiquitin-conjugating enzyme E2 R2	UB2R2 ub2r2	1260	22	-21.1	818
ssa-miR-122-5p	NM_001139937.1	Ubiquitin-conjugating enzyme E2 R2	UB2R2 ub2r2	1260	22	-21.8	1137
ssa-miR-200b-5p	NM_001139937.1	Ubiquitin-conjugating enzyme E2 R2	UB2R2 ub2r2	1260	22	-23.2	815
ssa-miR-462a-5p	NM_001139937.1	Ubiquitin-conjugating enzyme E2 R2	UB2R2 ub2r2	1260	23	-18.5	519
ssa-miR-727b-3p	NM_001139937.1	Ubiquitin-conjugating enzyme E2 R2	UB2R2 ub2r2	1260	19	-22.7	1
ssa-miR-8159-5p	NM_001139939.1	TFIIH basal transcription factor complex helicase subunit	ERCC2 ercc2	152	24	-18.6	17
ssa-miR-8159-5p	NM_001139940.1	Cytosolic purine 5-nucleotidase	5NTC 5ntc	562	24	-23.8	202
ssa-miR-novel-5-3p	NM_001139940.1	Cytosolic purine 5-nucleotidase	5NTC 5ntc	562	22	-23.1	421
ssa-miR-192a-1-3p	NM_001139941.1	Angiopoietin-related protein 4 precursor	ANGL4 angl4	1217	22	-20	458
ssa-miR-192b-5p	NM_001139941.1	Angiopoietin-related protein 4 precursor	ANGL4 angl4	1217	22	-20	458
ssa-miR-29a-5p	NM_001139941.1	Angiopoietin-related protein 4 precursor	ANGL4 angl4	1217	23	-18.2	421
ssa-miR-29e-5p	NM_001139941.1	Angiopoietin-related protein 4 precursor	ANGL4 angl4	1217	23	-18.2	421
ssa-miR-30c-d-1-3p	NM_001139941.1	Angiopoietin-related protein 4 precursor	ANGL4 angl4	1217	22	-19.5	22
ssa-miR-30c-d-1-3p	NM_001139941.1	Angiopoietin-related protein 4 precursor	ANGL4 angl4	1217	22	-18.4	604
ssa-miR-30d-2-3p	NM_001139941.1	Angiopoietin-related protein 4 precursor	ANGL4 angl4	1217	23	-21.1	13
ssa-miR-30d-2-3p	NM_001139941.1	Angiopoietin-related protein 4 precursor	ANGL4 angl4	1217	23	-19.1	600
ssa-miR-7a-2-6-3p	NM_001139941.1	Angiopoietin-related protein 4 precursor	ANGL4 angl4	1217	22	-23.4	993
ssa-miR-100a-2-3p	NM_001139942.1	Cold shock domain-containing protein C2 (cold shock domain-containing protein C2 isoform X1)	CSDC2 csdc2	1207	23	-22.3	475
ssa-miR-18b-3p	NM_001139942.1	Cold shock domain-containing protein C2 (cold shock domain-containing protein C2 isoform X1)	CSDC2 csdc2	1207	24	-35.4	49
ssa-miR-18c-3p	NM_001139942.1	Cold shock domain-containing protein C2 (cold shock domain-containing protein C2 isoform X1)	CSDC2 csdc2	1207	22	-33.1	52
ssa-miR-221-5p	NM_001139942.1	Cold shock domain-containing protein C2 (cold shock domain-containing protein C2 isoform X1)	CSDC2 csdc2	1207	23	-19.8	1044
ssa-miR-29a-3p	NM_001139942.1	Cold shock domain-containing protein C2 (cold shock domain-containing protein C2 isoform X1)	CSDC2 csdc2	1207	20	-21.8	79
ssa-miR-29b-1-5p	NM_001139942.1	Cold shock domain-containing protein C2 (cold shock domain-containing protein C2 isoform X1)	CSDC2 csdc2	1207	23	-19	84
ssa-miR-29b-3p	NM_001139942.1	Cold shock domain-containing protein C2 (cold shock domain-containing protein C2 isoform X1)	CSDC2 csdc2	1207	22	-22.9	78
ssa-miR-29c-3p	NM_001139942.1	Cold shock domain-containing protein C2 (cold shock domain-containing protein C2 isoform X1)	CSDC2 csdc2	1207	22	-22.9	78
ssa-miR-29de-3p	NM_001139942.1	Cold shock domain-containing protein C2 (cold shock domain-containing protein C2 isoform X1)	CSDC2 csdc2	1207	20	-20.6	79
ssa-miR-novel-2-3p	NM_001139942.1	Cold shock domain-containing protein C2 (cold shock domain-containing protein C2 isoform X1)	CSDC2 csdc2	1207	22	-19.1	471
ssa-miR-132-1-2-5p	NM_001139943.1	Non-specific serine/threonine protein kinase (EC 2.7.11.1)	SGK2 sgk2	1042	22	-28.1	159
ssa-miR-183-5p	NM_001139943.1	Non-specific serine/threonine protein kinase (EC 2.7.11.1)	SGK2 sgk2	1042	22	-19.9	826
ssa-miR-26a-3-3p	NM_001139943.1	Non-specific serine/threonine protein kinase (EC 2.7.11.1)	SGK2 sgk2	1042	22	-19.3	556
ssa-miR-29a-3p	NM_001139943.1	Non-specific serine/threonine protein kinase (EC 2.7.11.1)	SGK2 sgk2	1042	20	-21.1	839
ssa-miR-29b-3p	NM_001139943.1	Non-specific serine/threonine protein kinase (EC 2.7.11.1)	SGK2 sgk2	1042	22	-21.7	838
ssa-miR-29c-3p	NM_001139943.1	Non-specific serine/threonine protein kinase (EC 2.7.11.1)	SGK2 sgk2	1042	22	-22.4	838
ssa-miR-29de-3p	NM_001139943.1	Non-specific serine/threonine protein kinase (EC 2.7.11.1)	SGK2 sgk2	1042	20	-22.7	839
ssa-miR-30c-d-1-3p	NM_001139943.1	Non-specific serine/threonine protein kinase (EC 2.7.11.1)	SGK2 sgk2	1042	22	-18.2	761
ssa-miR-30d-2-3p	NM_001139943.1	Non-specific serine/threonine protein kinase (EC 2.7.11.1)	SGK2 sgk2	1042	23	-18.7	760
ssa-miR-146a-1-2-3p	NM_001139944.1	Gremlin-2 (gremlin-2 precursor)	GREM2 grem2	1764	23	-23.4	582
ssa-miR-146a-3-3p	NM_001139944.1	Gremlin-2 (gremlin-2 precursor)	GREM2 grem2	1764	22	-20	581
ssa-miR-146b-3p	NM_001139944.1	Gremlin-2 (gremlin-2 precursor)	GREM2 grem2	1764	22	-20	581
ssa-miR-222b-5p	NM_001139944.1	Gremlin-2 (gremlin-2 precursor)	GREM2 grem2	1764	22	-23	186
ssa-miR-8162-5p	NM_001139944.1	Gremlin-2 (gremlin-2 precursor)	GREM2 grem2	1764	23	-23.4	201
ssa-miR-8162-5p	NM_001139944.1	Gremlin-2 (gremlin-2 precursor)	GREM2 grem2	1764	23	-20.5	677
ssa-miR-novel-2-3p	NM_001139944.1	Gremlin-2 (gremlin-2 precursor)	GREM2 grem2	1764	22	-18.3	429
ssa-let-7d-c-1-3p	NM_001139945.1	Peptidylprolyl isomerase (EC 5.2.1.8)	FKBP8 fkbp8	983	22	-18.4	432
ssa-miR-21b-3p	NM_001139945.1	Peptidylprolyl isomerase (EC 5.2.1.8)	FKBP8 fkbp8	983	22	-19.7	793
ssa-miR-30d-2-3p	NM_001139946.1	FAM105B	F105B f105b	895	23	-18	275
ssa-miR-10b-5p	NM_001139947.1	Hsp70-binding protein 1	HPBP1 hpbp1	1191	22	-19.7	113
ssa-miR-10d-5p	NM_001139947.1	Hsp70-binding protein 1	HPBP1 hpbp1	1191	22	-20.8	113
ssa-miR-21a-2-3p	NM_001139947.1	Hsp70-binding protein 1	HPBP1 hpbp1	1191	22	-18.9	83
ssa-miR-21b-3p	NM_001139947.1	Hsp70-binding protein 1	HPBP1 hpbp1	1191	22	-18.9	83
ssa-miR-29c-5p	NM_001139947.1	Hsp70-binding protein 1	HPBP1 hpbp1	1191	23	-22	442
ssa-miR-8159-5p	NM_001139947.1	Hsp70-binding protein 1	HPBP1 hpbp1	1191	24	-21.9	808
ssa-miR-29b-2-5p	NM_001139948.1	Regulator of G-protein signaling 7-binding protein B	R7BPB r7bpb	536	25	-19.4	99
ssa-miR-29b-3-5p	NM_001139948.1	Regulator of G-protein signaling 7-binding protein B	R7BPB r7bpb	536	23	-23.6	383
ssa-miR-100a-2-3p	NM_001139949.1	Acetyl-CoA acetyltransferase, cytosolic	THIC thic	721	23	-27.4	511
ssa-miR-7a-2-6-3p	NM_001139949.1	Acetyl-CoA acetyltransferase, cytosolic	THIC thic	721	22	-23.4	345
ssa-miR-8162-5p	NM_001139949.1	Acetyl-CoA acetyltransferase, cytosolic	THIC thic	721	23	-23	490
ssa-miR-novel-2-3p	NM_001139949.1	Acetyl-CoA acetyltransferase, cytosolic	THIC thic	721	22	-21.7	684
ssa-let-7e-5p	NM_001139950.1	Gap junction protein	CXB1 cxb1	950	22	-19.6	518
ssa-let-7f-5p	NM_001139950.1	Gap junction protein	CXB1 cxb1	950	22	-21.5	510
ssa-miR-18c-3p	NM_001139950.1	Gap junction protein	CXB1 cxb1	950	22	-21.3	12
ssa-miR-10b-5p	NM_001139951.1	Protein phosphatase 1 regulatory subunit	PP12C pp12c	1054	22	-22.8	262
ssa-miR-10d-5p	NM_001139951.1	Protein phosphatase 1 regulatory subunit	PP12C pp12c	1054	22	-22	262
ssa-miR-26d-5p	NM_001139951.1	Protein phosphatase 1 regulatory subunit	PP12C pp12c	1054	22	-20.1	677
ssa-miR-462a-3p	NM_001139951.1	Protein phosphatase 1 regulatory subunit	PP12C pp12c	1054	22	-28	784
ssa-miR-727b-3p	NM_001139951.1	Protein phosphatase 1 regulatory subunit	PP12C pp12c	1054	19	-18.4	1
ssa-miR-novel-13-5p	NM_001139951.1	Protein phosphatase 1 regulatory subunit	PP12C pp12c	1054	22	-18.8	879
ssa-miR-222b-5p	NM_001139952.1	Probable serine carboxypeptidase CPVL (probable serine carboxypeptidase CPVL precursor)	CPVL cpvl	435	22	-20.3	1
ssa-miR-29d-5p	NM_001139952.1	Probable serine carboxypeptidase CPVL (probable serine carboxypeptidase CPVL precursor)	CPVL cpvl	435	23	-18.3	93
ssa-let-7a-1-3-3p	NM_001139953.1	Retinoblastoma-binding protein 6	RBBP6 rbbp6	1043	22	-20.4	215
ssa-miR-10b-5p	NM_001139953.1	Retinoblastoma-binding protein 6	RBBP6 rbbp6	1043	22	-23.8	901
ssa-miR-10d-5p	NM_001139953.1	Retinoblastoma-binding protein 6	RBBP6 rbbp6	1043	22	-23.9	901
ssa-miR-30d-2-3p	NM_001139953.1	Retinoblastoma-binding protein 6	RBBP6 rbbp6	1043	23	-18.3	833
ssa-miR-8162-5p	NM_001139953.1	Retinoblastoma-binding protein 6	RBBP6 rbbp6	1043	23	-21.1	235
ssa-miR-26d-5p	NM_001139954.1	Poly [ADP-ribose] polymerase (PARP) (EC 2.4.2.-)	PARP3 parp3	1192	22	-23.3	1114
ssa-miR-726-3p	NM_001139954.1	Poly [ADP-ribose] polymerase (PARP) (EC 2.4.2.-)	PARP3 parp3	1192	22	-22.5	901
ssa-miR-30c-d-1-3p	NM_001139955.1	Amidophosphoribosyltransferase (ATase) (EC 2.4.2.14) (Glutamine phosphoribosylpyrophosphate amidotransferase)	PUR1 pur1	560	22	-20.6	221
ssa-miR-30d-2-3p	NM_001139955.1	Amidophosphoribosyltransferase (ATase) (EC 2.4.2.14) (Glutamine phosphoribosylpyrophosphate amidotransferase)	PUR1 pur1	560	23	-22.7	205
ssa-miR-456-3p	NM_001139955.1	Amidophosphoribosyltransferase (ATase) (EC 2.4.2.14) (Glutamine phosphoribosylpyrophosphate amidotransferase)	PUR1 pur1	560	22	-20.2	181
ssa-miR-727b-3p	NM_001139955.1	Amidophosphoribosyltransferase (ATase) (EC 2.4.2.14) (Glutamine phosphoribosylpyrophosphate amidotransferase)	PUR1 pur1	560	19	-21.4	276
ssa-miR-146d-1-3p	NM_001139956.1	DnaJ homolog subfamily C member 7	DNJC7 dnjc7	1535	22	-21.4	456
ssa-miR-30c-d-1-3p	NM_001139956.1	DnaJ homolog subfamily C member 7	DNJC7 dnjc7	1535	22	-18.2	911
ssa-miR-30d-2-3p	NM_001139956.1	DnaJ homolog subfamily C member 7	DNJC7 dnjc7	1535	23	-19	895
ssa-miR-1338-5p	NM_001139957.1	Carbohydrate sulfotransferase (EC 2.8.2.-)	CHSTA chsta	1879	21	-22.7	1002
ssa-miR-18c-3p	NM_001139957.1	Carbohydrate sulfotransferase (EC 2.8.2.-)	CHSTA chsta	1879	22	-22.5	1356
ssa-miR-8159-5p	NM_001139957.1	Carbohydrate sulfotransferase (EC 2.8.2.-)	CHSTA chsta	1879	24	-30.1	1605
ssa-miR-novel-5-3p	NM_001139957.1	Carbohydrate sulfotransferase (EC 2.8.2.-)	CHSTA chsta	1879	22	-21.5	623
ssa-miR-novel-3-5p	NM_001139958.1	Cell division cycle protein 27 homolog (cell division cycle protein 27 homolog isoform X1)	CDC27 cdc27	579	22	-19.9	235
ssa-let-7a-1-3-3p	NM_001139959.1	HEXIM (HEXIM protein)	HEXIM hexim	898	22	-23.6	730
ssa-miR-1338-5p	NM_001139959.1	HEXIM (HEXIM protein)	HEXIM hexim	898	21	-27.1	82
ssa-miR-29b-1-5p	NM_001139959.1	HEXIM (HEXIM protein)	HEXIM hexim	898	23	-18.4	611
ssa-miR-29b-3-5p	NM_001139959.1	HEXIM (HEXIM protein)	HEXIM hexim	898	23	-22.4	50
ssa-miR-7a-2-6-3p	NM_001139959.1	HEXIM (HEXIM protein)	HEXIM hexim	898	22	-19	826
ssa-let-7b-3p	NM_001139960.1	Junction plakoglobin (junction plakoglobin isoform X1)	PLAK plak	691	22	-18.4	329
ssa-miR-125b-3-3p	NM_001139960.1	Junction plakoglobin (junction plakoglobin isoform X1)	PLAK plak	691	22	-18.9	339
ssa-miR-192a-1-3p	NM_001139960.1	Junction plakoglobin (junction plakoglobin isoform X1)	PLAK plak	691	22	-29.5	573
ssa-miR-192b-5p	NM_001139960.1	Junction plakoglobin (junction plakoglobin isoform X1)	PLAK plak	691	22	-29.3	573
ssa-miR-29a-5p	NM_001139961.1	Aminoacylase-1 (EC 3.5.1.14) (aminoacylase-1 isoform X2)	ACY1 acy1	1256	23	-22.2	1125
ssa-miR-29a-5p	NM_001139961.1	Aminoacylase-1 (EC 3.5.1.14) (aminoacylase-1 isoform X2)	ACY1 acy1	1256	23	-20.2	93
ssa-miR-29e-5p	NM_001139961.1	Aminoacylase-1 (EC 3.5.1.14) (aminoacylase-1 isoform X2)	ACY1 acy1	1256	23	-20.6	1125
ssa-miR-29e-5p	NM_001139961.1	Aminoacylase-1 (EC 3.5.1.14) (aminoacylase-1 isoform X2)	ACY1 acy1	1256	23	-19.8	93
ssa-miR-novel-2-3p	NM_001139962.1	transcription factor ETV6	ETV6 etv6	484	22	-19.7	173
ssa-let-7a-1-3-3p	NM_001139963.1	Disulfide-isomerase A5 (protein disulfide-isomerase A5 precursor) (EC 5.3.4.1)	PDIA5 pdia5	2630	22	-20.2	2373
ssa-let-7a-1-3-3p	NM_001139963.1	Disulfide-isomerase A5 (protein disulfide-isomerase A5 precursor) (EC 5.3.4.1)	PDIA5 pdia5	2630	22	-18.5	374
ssa-miR-1338-5p	NM_001139963.1	Disulfide-isomerase A5 (protein disulfide-isomerase A5 precursor) (EC 5.3.4.1)	PDIA5 pdia5	2630	21	-19.4	413
ssa-miR-183-5p	NM_001139963.1	Disulfide-isomerase A5 (protein disulfide-isomerase A5 precursor) (EC 5.3.4.1)	PDIA5 pdia5	2630	22	-18.3	1417
ssa-miR-21a-2-3p	NM_001139963.1	Disulfide-isomerase A5 (protein disulfide-isomerase A5 precursor) (EC 5.3.4.1)	PDIA5 pdia5	2630	22	-25.1	827
ssa-miR-21b-3p	NM_001139963.1	Disulfide-isomerase A5 (protein disulfide-isomerase A5 precursor) (EC 5.3.4.1)	PDIA5 pdia5	2630	22	-25.5	827
ssa-miR-462a-3p	NM_001139963.1	Disulfide-isomerase A5 (protein disulfide-isomerase A5 precursor) (EC 5.3.4.1)	PDIA5 pdia5	2630	22	-18.5	1196
ssa-miR-7a-2-6-3p	NM_001139963.1	Disulfide-isomerase A5 (protein disulfide-isomerase A5 precursor) (EC 5.3.4.1)	PDIA5 pdia5	2630	22	-18.8	1823
ssa-miR-8159-5p	NM_001139963.1	Disulfide-isomerase A5 (protein disulfide-isomerase A5 precursor) (EC 5.3.4.1)	PDIA5 pdia5	2630	24	-20.4	1297
ssa-miR-146d-1-3p	NM_001139964.1	Low density lipoprotein receptor adapter protein 1-B	ARHB arhb	1095	22	-22.7	112
ssa-miR-183-5p	NM_001139964.1	Low density lipoprotein receptor adapter protein 1-B	ARHB arhb	1095	22	-27	93
ssa-miR-1338-5p	NM_001139965.1	BRCA1-A complex subunit Abraxas	ccd98 abra1 ccdc98 fam175a	1226	21	-19.4	76
ssa-miR-146a-1-2-3p	NM_001139965.1	BRCA1-A complex subunit Abraxas	ccd98 abra1 ccdc98 fam175a	1226	23	-20.2	494
ssa-miR-192a-1-3p	NM_001139965.1	BRCA1-A complex subunit Abraxas	ccd98 abra1 ccdc98 fam175a	1226	22	-21	795
ssa-miR-192b-5p	NM_001139965.1	BRCA1-A complex subunit Abraxas	ccd98 abra1 ccdc98 fam175a	1226	22	-22.9	795
ssa-miR-8162-5p	NM_001139965.1	BRCA1-A complex subunit Abraxas	ccd98 abra1 ccdc98 fam175a	1226	23	-21.4	948
ssa-miR-21a-2-3p	NM_001139966.1	Cyclin-G2	CCNG2 ccng2	968	22	-22	748
ssa-miR-21b-3p	NM_001139966.1	Cyclin-G2	CCNG2 ccng2	968	22	-22.5	741
ssa-miR-8159-5p	NM_001139966.1	Cyclin-G2	CCNG2 ccng2	968	24	-23.2	212
ssa-miR-8159-5p	NM_001139966.1	Cyclin-G2	CCNG2 ccng2	968	24	-18.3	851
ssa-miR-462a-5p	NM_001139969.1	N-acetyltransferase ESCO1	ESCO1 esco1	228	23	-25.9	117
ssa-let-7d-c-1-3p	NM_001139970.1	LanC-like protein 2	LANC2 lanc2	689	22	-18.1	609
ssa-miR-184-3p	NM_001139971.1	Transforming growth factor beta-1-induced transcript 1 protein	TGFI1 tgfi1	944	22	-23.1	126
ssa-miR-18b-3p	NM_001139971.1	Transforming growth factor beta-1-induced transcript 1 protein	TGFI1 tgfi1	944	24	-22.4	48
ssa-miR-192a-5p	NM_001139972.1	C-C chemokine receptor type 6	CCR6 ccr6	771	21	-19.6	547
ssa-miR-29b-1-5p	NM_001139972.1	C-C chemokine receptor type 6	CCR6 ccr6	771	23	-18.7	455
ssa-miR-27a-2-5p	NM_001139973.1	Vacuolar protein sorting-associated protein 26B-B	V26BB v26bb	1097	25	-29.6	394
ssa-miR-27d-1-5p	NM_001139973.1	Vacuolar protein sorting-associated protein 26B-B	V26BB v26bb	1097	24	-23.3	394
ssa-let-7e-5p	NM_001139976.1	Alkaline phosphatase (EC 3.1.3.1)	PPB ppb	869	22	-18.4	592
ssa-let-7f-5p	NM_001139976.1	Alkaline phosphatase (EC 3.1.3.1)	PPB ppb	869	22	-23.2	590
ssa-miR-193a-5p	NM_001139976.1	Alkaline phosphatase (EC 3.1.3.1)	PPB ppb	869	21	-24.1	798
ssa-miR-29a-5p	NM_001139976.1	Alkaline phosphatase (EC 3.1.3.1)	PPB ppb	869	23	-19.9	474
ssa-miR-29e-5p	NM_001139976.1	Alkaline phosphatase (EC 3.1.3.1)	PPB ppb	869	23	-19.9	474
ssa-miR-727b-3p	NM_001139976.1	Alkaline phosphatase (EC 3.1.3.1)	PPB ppb	869	19	-19.8	31
ssa-miR-novel-2-3p	NM_001139976.1	Alkaline phosphatase (EC 3.1.3.1)	PPB ppb	869	22	-21.4	563
ssa-miR-193a-5p	NM_001139977.1	CEF-10 precursor	CEF10 cef10	751	21	-23.9	24
ssa-miR-29d-5p	NM_001139977.1	CEF-10 precursor	CEF10 cef10	751	23	-21.8	441
ssa-miR-novel-2-3p	NM_001139977.1	CEF-10 precursor	CEF10 cef10	751	22	-19.2	528
ssa-let-7a-1-3-3p	NM_001139978.1	FUS-interacting serine-arginine-rich protein 1	FUSIP fusip	848	22	-21	252
ssa-miR-novel-2-3p	NM_001139978.1	FUS-interacting serine-arginine-rich protein 1	FUSIP fusip	848	22	-19.8	113
ssa-miR-125b-3-3p	NM_001139980.1	Acyl-CoA desaturase	ACOD acod	941	22	-21.9	194
ssa-miR-novel-13-5p	NM_001139980.1	Acyl-CoA desaturase	ACOD acod	941	22	-21.2	301
ssa-miR-29b-2-5p	NM_001139981.1	Peroxisome assembly protein 10 (peroxisome biogenesis factor 10)	PEX10 pex10	988	25	-20.2	475
ssa-miR-731-5p	NM_001139981.1	Peroxisome assembly protein 10 (peroxisome biogenesis factor 10)	PEX10 pex10	988	23	-22.9	496
ssa-miR-192a-1-3p	NM_001139982.1	Interferon regulatory factor 4 (interferon regulatory factor 4 isoform X1)	IRF4 irf4	731	22	-22.8	364
ssa-miR-192b-5p	NM_001139982.1	Interferon regulatory factor 4 (interferon regulatory factor 4 isoform X1)	IRF4 irf4	731	22	-29	364
ssa-miR-731-5p	NM_001139982.1	Interferon regulatory factor 4 (interferon regulatory factor 4 isoform X1)	IRF4 irf4	731	23	-18.1	639
ssa-miR-100a-2-3p	NM_001139983.1	Cullin-4B	CUL4B cul4b	2472	23	-20.4	1744
ssa-miR-18c-3p	NM_001139983.1	Cullin-4B	CUL4B cul4b	2472	22	-19	764
ssa-miR-192a-5p	NM_001139983.1	Cullin-4B	CUL4B cul4b	2472	21	-18	570
ssa-miR-27a-2-5p	NM_001139983.1	Cullin-4B	CUL4B cul4b	2472	25	-22	2273
ssa-miR-27a-3-5p	NM_001139983.1	Cullin-4B	CUL4B cul4b	2472	24	-20.9	2273
ssa-miR-27d-1-5p	NM_001139983.1	Cullin-4B	CUL4B cul4b	2472	24	-18.1	2283
ssa-miR-29b-2-5p	NM_001139983.1	Cullin-4B	CUL4B cul4b	2472	25	-23.2	2213
ssa-miR-727b-3p	NM_001139983.1	Cullin-4B	CUL4B cul4b	2472	19	-20.6	2289
ssa-miR-456-3p	NM_001139984.1	Amiloride-sensitive cation channel 2, neuronal	ACCN2 accn2	1890	22	-27.5	1015
ssa-miR-456-3p	NM_001139984.1	Amiloride-sensitive cation channel 2, neuronal	ACCN2 accn2	1890	22	-24.8	1300
ssa-miR-727b-3p	NM_001139984.1	Amiloride-sensitive cation channel 2, neuronal	ACCN2 accn2	1890	19	-21.6	1227
ssa-miR-novel-3-5p	NM_001139984.1	Amiloride-sensitive cation channel 2, neuronal	ACCN2 accn2	1890	22	-18.3	831
ssa-miR-122-5p	NM_001139985.1	RanBP-type and C3HC4-type zinc finger-containing protein 1	UB7I3 ub7i3	1144	22	-20.5	802
ssa-miR-192a-1-3p	NM_001139985.1	RanBP-type and C3HC4-type zinc finger-containing protein 1	UB7I3 ub7i3	1144	22	-25.7	400
ssa-miR-192b-5p	NM_001139985.1	RanBP-type and C3HC4-type zinc finger-containing protein 1	UB7I3 ub7i3	1144	22	-25.1	400
ssa-miR-222b-5p	NM_001139985.1	RanBP-type and C3HC4-type zinc finger-containing protein 1	UB7I3 ub7i3	1144	22	-21.5	680
ssa-miR-29a-3p	NM_001139985.1	RanBP-type and C3HC4-type zinc finger-containing protein 1	UB7I3 ub7i3	1144	20	-21.5	16
ssa-miR-29b-3p	NM_001139985.1	RanBP-type and C3HC4-type zinc finger-containing protein 1	UB7I3 ub7i3	1144	22	-22.6	2
ssa-miR-29c-3p	NM_001139985.1	RanBP-type and C3HC4-type zinc finger-containing protein 1	UB7I3 ub7i3	1144	22	-21.5	16
ssa-miR-29c-5p	NM_001139985.1	RanBP-type and C3HC4-type zinc finger-containing protein 1	UB7I3 ub7i3	1144	23	-18.6	624
ssa-miR-29de-3p	NM_001139985.1	RanBP-type and C3HC4-type zinc finger-containing protein 1	UB7I3 ub7i3	1144	20	-19.9	16
ssa-miR-731-5p	NM_001139985.1	RanBP-type and C3HC4-type zinc finger-containing protein 1	UB7I3 ub7i3	1144	23	-24	45
ssa-let-7a-1-3-3p	NM_001139986.1	LIM domain transcription factor LMO4.1	LMO41 lmo41	1484	22	-20.7	1297
ssa-miR-187-5p	NM_001139986.1	LIM domain transcription factor LMO4.1	LMO41 lmo41	1484	24	-23.4	1051
ssa-miR-27a-3-5p	NM_001139986.1	LIM domain transcription factor LMO4.1	LMO41 lmo41	1484	24	-20	313
ssa-miR-27d-2-5p	NM_001139986.1	LIM domain transcription factor LMO4.1	LMO41 lmo41	1484	23	-21.4	313
ssa-miR-462a-5p	NM_001139986.1	LIM domain transcription factor LMO4.1	LMO41 lmo41	1484	23	-21	1243
ssa-miR-192a-5p	NM_001139987.1	Presenilin (EC 3.4.23.-)	PSN2 psn2	554	21	-22.5	261
ssa-miR-21a-2-3p	NM_001139988.1	Alpha-(1,3)-fucosyltransferase (EC 2.4.1.-)	FUT11 fut11	527	22	-19.9	265
ssa-miR-21b-3p	NM_001139988.1	Alpha-(1,3)-fucosyltransferase (EC 2.4.1.-)	FUT11 fut11	527	22	-23.2	265
ssa-miR-29d-5p	NM_001139988.1	Alpha-(1,3)-fucosyltransferase (EC 2.4.1.-)	FUT11 fut11	527	23	-22.9	11
ssa-miR-129-5p	NM_001139989.1	acid phosphatase-like protein 2 (EC 3.1.3.2)	ACPL2 acpl2	1093	21	-19.3	193
ssa-miR-192a-1-3p	NM_001139989.1	acid phosphatase-like protein 2 (EC 3.1.3.2)	ACPL2 acpl2	1093	22	-22.2	306
ssa-miR-192b-5p	NM_001139989.1	acid phosphatase-like protein 2 (EC 3.1.3.2)	ACPL2 acpl2	1093	22	-22.2	306
ssa-miR-200b-5p	NM_001139989.1	acid phosphatase-like protein 2 (EC 3.1.3.2)	ACPL2 acpl2	1093	22	-21.1	857
ssa-miR-29a-3p	NM_001139989.1	acid phosphatase-like protein 2 (EC 3.1.3.2)	ACPL2 acpl2	1093	20	-24.7	634
ssa-miR-29b-3p	NM_001139989.1	acid phosphatase-like protein 2 (EC 3.1.3.2)	ACPL2 acpl2	1093	22	-23.9	634
ssa-miR-29c-3p	NM_001139989.1	acid phosphatase-like protein 2 (EC 3.1.3.2)	ACPL2 acpl2	1093	22	-24.7	634
ssa-miR-29de-3p	NM_001139989.1	acid phosphatase-like protein 2 (EC 3.1.3.2)	ACPL2 acpl2	1093	20	-22.1	634
ssa-miR-192a-1-3p	NM_001139990.1	Erythrocyte Band 7 integral membrane protein	STOM stom	726	22	-25.5	314
ssa-miR-192b-5p	NM_001139990.1	Erythrocyte Band 7 integral membrane protein	STOM stom	726	22	-25.5	314
ssa-miR-26a-3-3p	NM_001139990.1	Erythrocyte Band 7 integral membrane protein	STOM stom	726	22	-18.4	516
ssa-miR-novel-13-5p	NM_001139990.1	Erythrocyte Band 7 integral membrane protein	STOM stom	726	22	-21.1	159
ssa-let-7b-3p	NM_001139991.1	ADP-ribosylation factor-related protein 1	ARFRP arfrp	996	22	-23.9	681
ssa-let-7d-c-1-3p	NM_001139991.1	ADP-ribosylation factor-related protein 1	ARFRP arfrp	996	22	-21.7	681
ssa-miR-30c-d-1-3p	NM_001139991.1	ADP-ribosylation factor-related protein 1	ARFRP arfrp	996	22	-18.3	63
ssa-miR-30d-2-3p	NM_001139991.1	ADP-ribosylation factor-related protein 1	ARFRP arfrp	996	23	-19.1	52
ssa-miR-novel-5-3p	NM_001139992.1	Carboxylic ester hydrolase (EC 3.1.1.-)	PNBA pnba	1148	22	-26.9	512
ssa-miR-29c-5p	NM_001139993.1	Cystathionine gamma-lyase	CGL cgl	882	23	-23.1	335
ssa-miR-8158-3p	NM_001139993.1	Cystathionine gamma-lyase	CGL cgl	882	23	-23.3	48
ssa-miR-192a-5p	NM_001139995.1	LOC399947 homolog (protein C11orf87-like) (protein C11orf87-like isoform X1)	YK005 yk005	1597	21	-21.3	895
ssa-miR-29a-3p	NM_001139995.1	LOC399947 homolog (protein C11orf87-like) (protein C11orf87-like isoform X1)	YK005 yk005	1597	20	-22.3	353
ssa-miR-29b-3p	NM_001139995.1	LOC399947 homolog (protein C11orf87-like) (protein C11orf87-like isoform X1)	YK005 yk005	1597	22	-22.6	349
ssa-miR-29c-3p	NM_001139995.1	LOC399947 homolog (protein C11orf87-like) (protein C11orf87-like isoform X1)	YK005 yk005	1597	22	-22.4	353
ssa-miR-29de-3p	NM_001139995.1	LOC399947 homolog (protein C11orf87-like) (protein C11orf87-like isoform X1)	YK005 yk005	1597	20	-23.9	353
ssa-miR-30c-d-1-3p	NM_001139995.1	LOC399947 homolog (protein C11orf87-like) (protein C11orf87-like isoform X1)	YK005 yk005	1597	22	-23.8	62
ssa-miR-30d-2-3p	NM_001139995.1	LOC399947 homolog (protein C11orf87-like) (protein C11orf87-like isoform X1)	YK005 yk005	1597	23	-24.2	61
ssa-miR-125b-3-3p	NM_001139996.1	Ubiquitin-conjugating enzyme E2 J1	UB2J1 ub2j1	1187	22	-23.2	58
ssa-miR-27a-2-5p	NM_001139996.1	Ubiquitin-conjugating enzyme E2 J1	UB2J1 ub2j1	1187	25	-21	879
ssa-miR-21a-2-3p	NM_001139997.1	Annexin	ANX11 anx11	1097	22	-24.5	168
ssa-miR-21b-3p	NM_001139997.1	Annexin	ANX11 anx11	1097	22	-24.5	168
ssa-miR-456-3p	NM_001139997.1	Annexin	ANX11 anx11	1097	22	-28.3	381
ssa-miR-18b-3p	NM_001139998.1	transcriptional regulator ERG	ERG erg	1622	24	-25.8	137
ssa-miR-200b-5p	NM_001139998.1	transcriptional regulator ERG	ERG erg	1622	22	-18.6	532
ssa-miR-26a-3-3p	NM_001139998.1	transcriptional regulator ERG	ERG erg	1622	22	-20.3	313
ssa-miR-29c-5p	NM_001139998.1	transcriptional regulator ERG	ERG erg	1622	23	-19.8	81
ssa-miR-456-3p	NM_001139998.1	transcriptional regulator ERG	ERG erg	1622	22	-22.7	1461
ssa-miR-21a-2-3p	NM_001139999.1	Connective tissue growth factor precursor	CTGF ctgf	961	22	-20.8	260
ssa-miR-21b-3p	NM_001139999.1	Connective tissue growth factor precursor	CTGF ctgf	961	22	-22.9	260
ssa-let-7b-3p	NM_001140000.1	Aquaporin-1	AQP1 aqp1	1766	22	-19.2	215
ssa-let-7d-c-1-3p	NM_001140000.1	Aquaporin-1	AQP1 aqp1	1766	22	-18.9	215
ssa-miR-10b-5p	NM_001140000.1	Aquaporin-1	AQP1 aqp1	1766	22	-18.6	1058
ssa-miR-10d-5p	NM_001140000.1	Aquaporin-1	AQP1 aqp1	1766	22	-18.7	1058
ssa-miR-129-5p	NM_001140000.1	Aquaporin-1	AQP1 aqp1	1766	21	-25.9	1397
ssa-miR-18c-3p	NM_001140000.1	Aquaporin-1	AQP1 aqp1	1766	22	-25.8	1381
ssa-miR-29b-1-5p	NM_001140000.1	Aquaporin-1	AQP1 aqp1	1766	23	-24.1	515
ssa-miR-462a-3p	NM_001140000.1	Aquaporin-1	AQP1 aqp1	1766	22	-26.2	498
ssa-miR-novel-5-3p	NM_001140000.1	Aquaporin-1	AQP1 aqp1	1766	22	-23.4	696
ssa-miR-21a-2-3p	NM_001140001.1	Monoglyceride lipase (EC 3.1.1.23)	MGLL mgll	1034	22	-19.2	669
ssa-miR-21b-3p	NM_001140001.1	Monoglyceride lipase (EC 3.1.1.23)	MGLL mgll	1034	22	-20.2	663
ssa-miR-novel-2-3p	NM_001140001.1	Monoglyceride lipase (EC 3.1.1.23)	MGLL mgll	1034	22	-20.9	645
ssa-miR-100a-2-3p	NM_001140002.1	Integrin-linked protein kinase (EC 2.7.11.1)	ILK ilk	1608	23	-26.3	511
ssa-miR-29a-3p	NM_001140002.1	Integrin-linked protein kinase (EC 2.7.11.1)	ILK ilk	1608	20	-18.5	73
ssa-miR-29b-3p	NM_001140002.1	Integrin-linked protein kinase (EC 2.7.11.1)	ILK ilk	1608	22	-20	67
ssa-miR-29c-3p	NM_001140002.1	Integrin-linked protein kinase (EC 2.7.11.1)	ILK ilk	1608	22	-18.5	73
ssa-miR-29c-5p	NM_001140002.1	Integrin-linked protein kinase (EC 2.7.11.1)	ILK ilk	1608	23	-19.3	490
ssa-miR-29de-3p	NM_001140002.1	Integrin-linked protein kinase (EC 2.7.11.1)	ILK ilk	1608	20	-21.2	73
ssa-miR-731-5p	NM_001140002.1	Integrin-linked protein kinase (EC 2.7.11.1)	ILK ilk	1608	23	-23.4	1007
ssa-miR-7a-2-6-3p	NM_001140002.1	Integrin-linked protein kinase (EC 2.7.11.1)	ILK ilk	1608	22	-20.9	168
ssa-miR-novel-5-3p	NM_001140002.1	Integrin-linked protein kinase (EC 2.7.11.1)	ILK ilk	1608	22	-23.1	1380
ssa-miR-21a-2-3p	NM_001140003.1	V-type proton ATPase subunit H	VATH vath	805	22	-18.3	369
ssa-miR-21a-2-3p	NM_001140003.1	V-type proton ATPase subunit H	VATH vath	805	22	-18.3	464
ssa-miR-21b-3p	NM_001140003.1	V-type proton ATPase subunit H	VATH vath	805	22	-21.4	373
ssa-miR-21b-3p	NM_001140003.1	V-type proton ATPase subunit H	VATH vath	805	22	-21.4	468
ssa-miR-26d-5p	NM_001140003.1	V-type proton ATPase subunit H	VATH vath	805	22	-18.7	648
ssa-miR-727b-3p	NM_001140003.1	V-type proton ATPase subunit H	VATH vath	805	19	-26.6	435
ssa-miR-727b-3p	NM_001140003.1	V-type proton ATPase subunit H	VATH vath	805	19	-24.2	559
ssa-miR-727b-3p	NM_001140003.1	V-type proton ATPase subunit H	VATH vath	805	19	-23.7	491
ssa-miR-727b-3p	NM_001140003.1	V-type proton ATPase subunit H	VATH vath	805	19	-22.2	516
ssa-miR-727b-3p	NM_001140003.1	V-type proton ATPase subunit H	VATH vath	805	19	-21.6	541
ssa-miR-8159-5p	NM_001140003.1	V-type proton ATPase subunit H	VATH vath	805	24	-24.3	91
ssa-miR-8159-5p	NM_001140003.1	V-type proton ATPase subunit H	VATH vath	805	24	-20.9	121
ssa-miR-8159-5p	NM_001140003.1	V-type proton ATPase subunit H	VATH vath	805	24	-20.9	221
ssa-miR-8159-5p	NM_001140003.1	V-type proton ATPase subunit H	VATH vath	805	24	-20.9	241
ssa-miR-8159-5p	NM_001140003.1	V-type proton ATPase subunit H	VATH vath	805	24	-20.6	180
ssa-miR-129-5p	NM_001140004.1	Peflin (peflin isoform X1)	PEF1 pef1	920	21	-19.5	142
ssa-miR-29a-5p	NM_001140004.1	Peflin (peflin isoform X1)	PEF1 pef1	920	23	-20.3	573
ssa-miR-29e-5p	NM_001140004.1	Peflin (peflin isoform X1)	PEF1 pef1	920	23	-23.5	577
ssa-miR-456-3p	NM_001140004.1	Peflin (peflin isoform X1)	PEF1 pef1	920	22	-23.9	110
ssa-miR-125a-1-3p	NM_001140005.1	Nucleoporin-like 2 (nucleoporin-like protein 2)	NUPL2 nupl2	393	22	-28.8	63
ssa-miR-221-5p	NM_001140006.1	Uracil phosphoribosyltransferase	UPP upp	1672	23	-21.2	687
ssa-miR-26d-5p	NM_001140006.1	Uracil phosphoribosyltransferase	UPP upp	1672	22	-26.1	1090
ssa-miR-29c-5p	NM_001140006.1	Uracil phosphoribosyltransferase	UPP upp	1672	23	-18.7	660
ssa-miR-184-3p	NM_001140007.1	Glyoxylate reductase	GYAR gyar	1004	22	-30.1	736
ssa-miR-29d-5p	NM_001140007.1	Glyoxylate reductase	GYAR gyar	1004	23	-27.2	515
ssa-miR-727b-3p	NM_001140007.1	Glyoxylate reductase	GYAR gyar	1004	19	-19	371
ssa-miR-8159-3p	NM_001140007.1	Glyoxylate reductase	GYAR gyar	1004	21	-27.7	218
ssa-miR-novel-5-3p	NM_001140007.1	Glyoxylate reductase	GYAR gyar	1004	22	-20.2	238
ssa-miR-187-5p	NM_001140008.1	Engulfment and Cell motility protein 1 (engulfment and cell motility protein 1 isoform X3)	ELMO1 elmo1	1447	24	-20.9	202
ssa-miR-29c-5p	NM_001140008.1	Engulfment and Cell motility protein 1 (engulfment and cell motility protein 1 isoform X3)	ELMO1 elmo1	1447	23	-18.3	879
ssa-miR-30c-d-1-3p	NM_001140008.1	Engulfment and Cell motility protein 1 (engulfment and cell motility protein 1 isoform X3)	ELMO1 elmo1	1447	22	-18	1376
ssa-miR-30d-2-3p	NM_001140008.1	Engulfment and Cell motility protein 1 (engulfment and cell motility protein 1 isoform X3)	ELMO1 elmo1	1447	23	-20	1376
ssa-miR-7a-2-6-3p	NM_001140008.1	Engulfment and Cell motility protein 1 (engulfment and cell motility protein 1 isoform X3)	ELMO1 elmo1	1447	22	-20.3	1196
ssa-miR-8162-5p	NM_001140008.1	Engulfment and Cell motility protein 1 (engulfment and cell motility protein 1 isoform X3)	ELMO1 elmo1	1447	23	-23.7	685
ssa-miR-novel-5-5p	NM_001140008.1	Engulfment and Cell motility protein 1 (engulfment and cell motility protein 1 isoform X3)	ELMO1 elmo1	1447	22	-18.5	1045
ssa-miR-183-5p	NM_001140009.1	Mediator of RNA polymerase II transcription subunit 6 (Mediator complex subunit 6)	MED6 med6	861	22	-19	366
ssa-miR-7a-2-6-3p	NM_001140009.1	Mediator of RNA polymerase II transcription subunit 6 (Mediator complex subunit 6)	MED6 med6	861	22	-22.1	649
ssa-miR-8159-5p	NM_001140009.1	Mediator of RNA polymerase II transcription subunit 6 (Mediator complex subunit 6)	MED6 med6	861	24	-24	460
ssa-miR-27d-1-5p	NM_001140010.1	T-complex protein 1 subunit delta	TCPD tcpd	189	24	-18.8	95
ssa-miR-456-3p	NM_001140010.1	T-complex protein 1 subunit delta	TCPD tcpd	189	22	-22.9	17
ssa-miR-8159-5p	NM_001140010.1	T-complex protein 1 subunit delta	TCPD tcpd	189	24	-19.8	20
ssa-miR-21a-2-3p	NM_001140011.1	N-acetylgalactosamine kinase (EC 2.7.1.157)	GALK2 galk2	678	22	-25	225
ssa-miR-21a-2-3p	NM_001140011.1	N-acetylgalactosamine kinase (EC 2.7.1.157)	GALK2 galk2	678	22	-25	257
ssa-miR-21a-2-3p	NM_001140011.1	N-acetylgalactosamine kinase (EC 2.7.1.157)	GALK2 galk2	678	22	-25	321
ssa-miR-21a-2-3p	NM_001140011.1	N-acetylgalactosamine kinase (EC 2.7.1.157)	GALK2 galk2	678	22	-25	353
ssa-miR-21a-2-3p	NM_001140011.1	N-acetylgalactosamine kinase (EC 2.7.1.157)	GALK2 galk2	678	22	-24	194
ssa-miR-21b-3p	NM_001140011.1	N-acetylgalactosamine kinase (EC 2.7.1.157)	GALK2 galk2	678	22	-31.5	225
ssa-miR-21b-3p	NM_001140011.1	N-acetylgalactosamine kinase (EC 2.7.1.157)	GALK2 galk2	678	22	-31.5	257
ssa-miR-21b-3p	NM_001140011.1	N-acetylgalactosamine kinase (EC 2.7.1.157)	GALK2 galk2	678	22	-31.5	321
ssa-miR-21b-3p	NM_001140011.1	N-acetylgalactosamine kinase (EC 2.7.1.157)	GALK2 galk2	678	22	-31.5	353
ssa-miR-21b-3p	NM_001140011.1	N-acetylgalactosamine kinase (EC 2.7.1.157)	GALK2 galk2	678	22	-30.5	194
ssa-miR-100a-2-3p	NM_001140012.1	Tetraspanin	TSN14 tsn14	2220	23	-20.1	814
ssa-miR-10b-5p	NM_001140012.1	Tetraspanin	TSN14 tsn14	2220	22	-24.2	18
ssa-miR-10d-5p	NM_001140012.1	Tetraspanin	TSN14 tsn14	2220	22	-23.4	18
ssa-miR-21a-2-3p	NM_001140012.1	Tetraspanin	TSN14 tsn14	2220	22	-23.1	1252
ssa-miR-21b-3p	NM_001140012.1	Tetraspanin	TSN14 tsn14	2220	22	-23.1	1252
ssa-miR-29b-2-5p	NM_001140012.1	Tetraspanin	TSN14 tsn14	2220	25	-22.6	1208
ssa-miR-29d-5p	NM_001140012.1	Tetraspanin	TSN14 tsn14	2220	23	-20.7	1140
ssa-miR-727b-3p	NM_001140012.1	Tetraspanin	TSN14 tsn14	2220	19	-24.3	1623
ssa-miR-7a-2-6-3p	NM_001140012.1	Tetraspanin	TSN14 tsn14	2220	22	-21	1250
ssa-miR-8159-5p	NM_001140012.1	Tetraspanin	TSN14 tsn14	2220	24	-19.7	2029
ssa-miR-129-5p	NM_001140013.1	Rhombotin-2	RBTN2 rbtn2	901	21	-20.8	373
ssa-miR-192a-1-3p	NM_001140013.1	Rhombotin-2	RBTN2 rbtn2	901	22	-20.1	686
ssa-miR-192b-5p	NM_001140013.1	Rhombotin-2	RBTN2 rbtn2	901	22	-25	707
ssa-miR-183-5p	NM_001140014.1	Peptidylprolyl isomerase (EC 5.2.1.8)	FKB1A fkb1a	2490	22	-19.2	2278
ssa-miR-187-5p	NM_001140014.1	Peptidylprolyl isomerase (EC 5.2.1.8)	FKB1A fkb1a	2490	24	-20.6	1835
ssa-miR-193a-5p	NM_001140014.1	Peptidylprolyl isomerase (EC 5.2.1.8)	FKB1A fkb1a	2490	21	-24.2	742
ssa-miR-29b-2-5p	NM_001140014.1	Peptidylprolyl isomerase (EC 5.2.1.8)	FKB1A fkb1a	2490	25	-20.5	1999
ssa-miR-29b-3-5p	NM_001140014.1	Peptidylprolyl isomerase (EC 5.2.1.8)	FKB1A fkb1a	2490	23	-19.3	144
ssa-miR-novel-5-3p	NM_001140014.1	Peptidylprolyl isomerase (EC 5.2.1.8)	FKB1A fkb1a	2490	22	-19.8	588
ssa-miR-125b-3-3p	NM_001140015.1	Zinc finger protein 576	ZN576 zn576	1170	22	-21.4	920
ssa-miR-8159-5p	NM_001140015.1	Zinc finger protein 576	ZN576 zn576	1170	24	-19.2	402
ssa-miR-novel-13-5p	NM_001140015.1	Zinc finger protein 576	ZN576 zn576	1170	22	-22	62
ssa-miR-192a-1-3p	NM_001140016.1	14-3-3 protein gamma-2	143G2 143g2	1685	22	-22.1	1501
ssa-miR-192a-5p	NM_001140016.1	14-3-3 protein gamma-2	143G2 143g2	1685	21	-19.1	781
ssa-miR-192b-5p	NM_001140016.1	14-3-3 protein gamma-2	143G2 143g2	1685	22	-21.5	1501
ssa-miR-200b-5p	NM_001140016.1	14-3-3 protein gamma-2	143G2 143g2	1685	22	-25	981
ssa-miR-29c-5p	NM_001140016.1	14-3-3 protein gamma-2	143G2 143g2	1685	23	-19.2	882
ssa-miR-29d-5p	NM_001140016.1	14-3-3 protein gamma-2	143G2 143g2	1685	23	-22.9	836
ssa-miR-30c-d-1-3p	NM_001140016.1	14-3-3 protein gamma-2	143G2 143g2	1685	22	-19.3	209
ssa-miR-30d-2-3p	NM_001140016.1	14-3-3 protein gamma-2	143G2 143g2	1685	23	-19.4	209
ssa-miR-29b-3p	NM_001140017.1	sprouty homolog 1 (sprouty homolog 1 isoform X1)	SPY1 spy1	901	22	-19.4	339
ssa-miR-29c-3p	NM_001140017.1	sprouty homolog 1 (sprouty homolog 1 isoform X1)	SPY1 spy1	901	22	-19.2	333
ssa-miR-146d-1-3p	NM_001140018.1	Sorting nexin	SNX9 snx9	1549	22	-26.5	449
ssa-miR-146d-1-3p	NM_001140018.1	Sorting nexin	SNX9 snx9	1549	22	-20.6	583
ssa-miR-146d-1-3p	NM_001140018.1	Sorting nexin	SNX9 snx9	1549	22	-20.3	1050
ssa-miR-21a-2-3p	NM_001140018.1	Sorting nexin	SNX9 snx9	1549	22	-19	1449
ssa-miR-21b-3p	NM_001140018.1	Sorting nexin	SNX9 snx9	1549	22	-18.7	1449
ssa-miR-30c-d-1-3p	NM_001140018.1	Sorting nexin	SNX9 snx9	1549	22	-20.8	2
ssa-miR-30d-2-3p	NM_001140018.1	Sorting nexin	SNX9 snx9	1549	23	-21.4	2
ssa-miR-129-5p	NM_001140019.1	Heterogeneous nuclear ribonucleoprotein L-like	HNRLL hnrll	1604	21	-18.2	526
ssa-miR-146d-1-3p	NM_001140019.1	Heterogeneous nuclear ribonucleoprotein L-like	HNRLL hnrll	1604	22	-19.6	1164
ssa-miR-462a-3p	NM_001140019.1	Heterogeneous nuclear ribonucleoprotein L-like	HNRLL hnrll	1604	22	-28	106
ssa-miR-7a-2-6-3p	NM_001140019.1	Heterogeneous nuclear ribonucleoprotein L-like	HNRLL hnrll	1604	22	-22.3	387
ssa-miR-184-3p	NM_001140020.1	Transmembrane protein 163	TM163 tm163	1661	22	-23.2	243
ssa-miR-18b-3p	NM_001140020.1	Transmembrane protein 163	TM163 tm163	1661	24	-27.3	1232
ssa-miR-18c-3p	NM_001140020.1	Transmembrane protein 163	TM163 tm163	1661	22	-26.9	1
ssa-miR-459-3p	NM_001140020.1	Transmembrane protein 163	TM163 tm163	1661	22	-26.1	1033
ssa-let-7a-1-3-3p	NM_001140021.1	RILP-like protein 1	RIPL1 ripl1	613	22	-18.8	192
ssa-miR-727b-3p	NM_001140021.1	RILP-like protein 1	RIPL1 ripl1	613	19	-19.2	165
ssa-let-7a-1-3-3p	NM_001140022.1	Hypoxia-inducible factor 1 alpha	HIF1A hif1a	1248	22	-24.1	429
ssa-miR-122-5p	NM_001140022.1	Hypoxia-inducible factor 1 alpha	HIF1A hif1a	1248	22	-21.9	55
ssa-miR-143-3p	NM_001140022.1	Hypoxia-inducible factor 1 alpha	HIF1A hif1a	1248	21	-20.8	1094
ssa-miR-143-3p	NM_001140022.1	Hypoxia-inducible factor 1 alpha	HIF1A hif1a	1248	21	-18.3	1116
ssa-miR-221-5p	NM_001140022.1	Hypoxia-inducible factor 1 alpha	HIF1A hif1a	1248	23	-21.5	177
ssa-miR-26a-3-3p	NM_001140022.1	Hypoxia-inducible factor 1 alpha	HIF1A hif1a	1248	22	-18.2	307
ssa-miR-29b-3p	NM_001140022.1	Hypoxia-inducible factor 1 alpha	HIF1A hif1a	1248	22	-19.6	290
ssa-miR-novel-2-3p	NM_001140022.1	Hypoxia-inducible factor 1 alpha	HIF1A hif1a	1248	22	-27.2	298
ssa-miR-183-5p	NM_001140023.1	Ribonucleoside-diphosphate reductase subunit M2	RIR2 rir2	340	22	-19.4	142
ssa-miR-125b-3-3p	NM_001140025.1	TM2 domain-containing protein 2 precursor	TM2D2 tm2d2	1413	22	-29.2	332
ssa-miR-146a-1-2-3p	NM_001140025.1	TM2 domain-containing protein 2 precursor	TM2D2 tm2d2	1413	23	-18.1	350
ssa-miR-29b-2-5p	NM_001140025.1	TM2 domain-containing protein 2 precursor	TM2D2 tm2d2	1413	25	-19.9	422
ssa-miR-100a-2-3p	NM_001140026.1	Rho GTPase-activating protein 15	RHG15 rhg15	815	23	-21.2	50
ssa-miR-146a-1-2-3p	NM_001140026.1	Rho GTPase-activating protein 15	RHG15 rhg15	815	23	-18.5	362
ssa-miR-192a-1-3p	NM_001140026.1	Rho GTPase-activating protein 15	RHG15 rhg15	815	22	-24.3	176
ssa-miR-192b-5p	NM_001140026.1	Rho GTPase-activating protein 15	RHG15 rhg15	815	22	-24.3	176
ssa-miR-1338-5p	NM_001140027.1	Far upstream element-binding protein 3	FUBP3 fubp3	1415	21	-23.6	1173
ssa-miR-462a-3p	NM_001140027.1	Far upstream element-binding protein 3	FUBP3 fubp3	1415	22	-22.9	1156
ssa-miR-novel-5-3p	NM_001140029.1	Acetolactate synthase-like protein	ILVBL ilvbl	805	22	-23.3	343
ssa-let-7a-1-3-3p	NM_001140030.1	Endothelin B receptor-like protein 2 (Endothelin B receptor-like protein 2 precursor)	ETBR2 etbr2	914	22	-21	765
ssa-miR-146a-1-2-3p	NM_001140030.1	Endothelin B receptor-like protein 2 (Endothelin B receptor-like protein 2 precursor)	ETBR2 etbr2	914	23	-18.8	576
ssa-miR-146d-1-3p	NM_001140030.1	Endothelin B receptor-like protein 2 (Endothelin B receptor-like protein 2 precursor)	ETBR2 etbr2	914	22	-24.3	144
ssa-miR-462a-3p	NM_001140030.1	Endothelin B receptor-like protein 2 (Endothelin B receptor-like protein 2 precursor)	ETBR2 etbr2	914	22	-29.7	278
ssa-miR-731-5p	NM_001140030.1	Endothelin B receptor-like protein 2 (Endothelin B receptor-like protein 2 precursor)	ETBR2 etbr2	914	23	-18.5	644
ssa-miR-novel-13-5p	NM_001140030.1	Endothelin B receptor-like protein 2 (Endothelin B receptor-like protein 2 precursor)	ETBR2 etbr2	914	22	-26.8	781
ssa-miR-27d-2-5p	NM_001140032.1	Polypyrimidine tract-binding protein 2	PTBP2 ptbp2	1495	23	-19.2	233
ssa-miR-29b-2-5p	NM_001140032.1	Polypyrimidine tract-binding protein 2	PTBP2 ptbp2	1495	25	-20.2	135
ssa-miR-29b-2-5p	NM_001140032.1	Polypyrimidine tract-binding protein 2	PTBP2 ptbp2	1495	25	-20	615
ssa-miR-29d-5p	NM_001140032.1	Polypyrimidine tract-binding protein 2	PTBP2 ptbp2	1495	23	-25.4	592
ssa-let-7a-1-3-3p	NM_001140033.1	RAB2A, member RAS oncogene family (Ras-related protein Rab-2A)	rab2a RAB2A	1582	22	-20	1340
ssa-miR-29b-2-5p	NM_001140033.1	RAB2A, member RAS oncogene family (Ras-related protein Rab-2A)	rab2a RAB2A	1582	25	-19	589
ssa-miR-30c-d-1-3p	NM_001140033.1	RAB2A, member RAS oncogene family (Ras-related protein Rab-2A)	rab2a RAB2A	1582	22	-19.5	1540
ssa-miR-30d-2-3p	NM_001140033.1	RAB2A, member RAS oncogene family (Ras-related protein Rab-2A)	rab2a RAB2A	1582	23	-20.3	1540
ssa-miR-8159-5p	NM_001140033.1	RAB2A, member RAS oncogene family (Ras-related protein Rab-2A)	rab2a RAB2A	1582	24	-22.3	235
ssa-miR-21a-2-3p	NM_001140034.1	E3 ubiquitin-protein ligase MARCH5	MARH5 marh5	1468	22	-18.9	1254
ssa-miR-21a-2-3p	NM_001140034.1	E3 ubiquitin-protein ligase MARCH5	MARH5 marh5	1468	22	-18.7	798
ssa-miR-21b-3p	NM_001140034.1	E3 ubiquitin-protein ligase MARCH5	MARH5 marh5	1468	22	-23.3	798
ssa-miR-21b-3p	NM_001140034.1	E3 ubiquitin-protein ligase MARCH5	MARH5 marh5	1468	22	-20	1254
ssa-miR-462a-5p	NM_001140034.1	E3 ubiquitin-protein ligase MARCH5	MARH5 marh5	1468	23	-18.9	808
ssa-miR-novel-5-3p	NM_001140034.1	E3 ubiquitin-protein ligase MARCH5	MARH5 marh5	1468	22	-18.3	137
ssa-miR-125b-3-3p	NM_001140038.1	Complexin-1 (complexin-1-like)	CPLX1 cplx1 LOC106609885	1066	22	-26.8	769
ssa-miR-125b-3-3p	NM_001140038.1	Complexin-1 (complexin-1-like)	CPLX1 cplx1 LOC106609885	1066	22	-26	131
ssa-miR-129-5p	NM_001140038.1	Complexin-1 (complexin-1-like)	CPLX1 cplx1 LOC106609885	1066	21	-18.2	510
ssa-miR-727b-3p	NM_001140038.1	Complexin-1 (complexin-1-like)	CPLX1 cplx1 LOC106609885	1066	19	-20.3	497
ssa-miR-novel-2-3p	NM_001140038.1	Complexin-1 (complexin-1-like)	CPLX1 cplx1 LOC106609885	1066	22	-22	1025
ssa-miR-1338-5p	NM_001140039.1	FYN-binding protein	FYB fyb	299	21	-20.1	101
ssa-miR-122-5p	NM_001140040.1	Y+L amino acid transporter 1	YLAT1 ylat1	1996	22	-24.3	1304
ssa-miR-183-5p	NM_001140040.1	Y+L amino acid transporter 1	YLAT1 ylat1	1996	22	-23.2	668
ssa-miR-18b-3p	NM_001140040.1	Y+L amino acid transporter 1	YLAT1 ylat1	1996	24	-25.1	603
ssa-miR-21a-2-3p	NM_001140040.1	Y+L amino acid transporter 1	YLAT1 ylat1	1996	22	-21.1	614
ssa-miR-21b-3p	NM_001140040.1	Y+L amino acid transporter 1	YLAT1 ylat1	1996	22	-20.7	614
ssa-miR-29b-1-5p	NM_001140040.1	Y+L amino acid transporter 1	YLAT1 ylat1	1996	23	-18.2	1519
ssa-miR-30a-3-4-3p	NM_001140040.1	Y+L amino acid transporter 1	YLAT1 ylat1	1996	22	-23.7	972
ssa-miR-30d-2-3p	NM_001140040.1	Y+L amino acid transporter 1	YLAT1 ylat1	1996	23	-19	22
ssa-miR-146d-1-3p	NM_001140041.1	YIPF3 (protein YIPF3)	YIPF3 yipf3	864	22	-27.9	37
ssa-miR-8159-5p	NM_001140041.1	YIPF3 (protein YIPF3)	YIPF3 yipf3	864	24	-20.3	92
ssa-miR-novel-2-3p	NM_001140041.1	YIPF3 (protein YIPF3)	YIPF3 yipf3	864	22	-19.1	339
ssa-miR-183-5p	NM_001140042.1	Insulin-induced gene protein	INSI2 insi2	1593	22	-22.6	646
ssa-miR-456-3p	NM_001140042.1	Insulin-induced gene protein	INSI2 insi2	1593	22	-21.4	697
ssa-miR-462a-3p	NM_001140042.1	Insulin-induced gene protein	INSI2 insi2	1593	22	-18.6	712
ssa-miR-727b-3p	NM_001140042.1	Insulin-induced gene protein	INSI2 insi2	1593	19	-22.6	1497
ssa-miR-8158-3p	NM_001140042.1	Insulin-induced gene protein	INSI2 insi2	1593	23	-19.3	565
ssa-miR-30c-d-1-3p	NM_001140043.1	Translocating chain-associated membrane protein	TRAM2 tram2	865	22	-21.9	445
ssa-miR-30d-2-3p	NM_001140043.1	Translocating chain-associated membrane protein	TRAM2 tram2	865	23	-24.4	444
ssa-miR-8159-5p	NM_001140043.1	Translocating chain-associated membrane protein	TRAM2 tram2	865	24	-23.3	570
ssa-miR-125b-3-3p	NM_001140045.1	Guanine nucleotide-binding protein subunit gamma	GBG12 gbg12	1617	22	-26	461
ssa-miR-146a-1-2-3p	NM_001140045.1	Guanine nucleotide-binding protein subunit gamma	GBG12 gbg12	1617	23	-23.5	792
ssa-miR-146a-3-3p	NM_001140045.1	Guanine nucleotide-binding protein subunit gamma	GBG12 gbg12	1617	22	-20.4	797
ssa-miR-146b-3p	NM_001140045.1	Guanine nucleotide-binding protein subunit gamma	GBG12 gbg12	1617	22	-19.9	797
ssa-miR-183-5p	NM_001140045.1	Guanine nucleotide-binding protein subunit gamma	GBG12 gbg12	1617	22	-21.3	1388
ssa-miR-29a-3p	NM_001140045.1	Guanine nucleotide-binding protein subunit gamma	GBG12 gbg12	1617	20	-22.5	1178
ssa-miR-29b-3p	NM_001140045.1	Guanine nucleotide-binding protein subunit gamma	GBG12 gbg12	1617	22	-21.8	1178
ssa-miR-29c-3p	NM_001140045.1	Guanine nucleotide-binding protein subunit gamma	GBG12 gbg12	1617	22	-22.5	1178
ssa-miR-29de-3p	NM_001140045.1	Guanine nucleotide-binding protein subunit gamma	GBG12 gbg12	1617	20	-22.5	1178
ssa-miR-462a-3p	NM_001140045.1	Guanine nucleotide-binding protein subunit gamma	GBG12 gbg12	1617	22	-24.4	616
ssa-let-7b-3p	NM_001140046.1	Ran-specific GTPase-activating protein	RANG rang	1301	22	-20.8	633
ssa-let-7d-c-1-3p	NM_001140046.1	Ran-specific GTPase-activating protein	RANG rang	1301	22	-19	633
ssa-miR-125a-1-3p	NM_001140046.1	Ran-specific GTPase-activating protein	RANG rang	1301	22	-22.6	536
ssa-miR-192a-5p	NM_001140046.1	Ran-specific GTPase-activating protein	RANG rang	1301	21	-26.2	1018
ssa-miR-727b-3p	NM_001140046.1	Ran-specific GTPase-activating protein	RANG rang	1301	19	-20.3	415
ssa-miR-731-3p	NM_001140046.1	Ran-specific GTPase-activating protein	RANG rang	1301	22	-29.2	995
ssa-miR-192a-1-3p	NM_001140047.1	Granulins precursor	GRN grn	1361	22	-22.5	710
ssa-miR-192b-5p	NM_001140047.1	Granulins precursor	GRN grn	1361	22	-24.1	710
ssa-miR-26a-3-3p	NM_001140047.1	Granulins precursor	GRN grn	1361	22	-18.8	193
ssa-miR-29a-3p	NM_001140047.1	Granulins precursor	GRN grn	1361	20	-20.3	863
ssa-miR-29b-3p	NM_001140047.1	Granulins precursor	GRN grn	1361	22	-19.6	863
ssa-miR-29c-3p	NM_001140047.1	Granulins precursor	GRN grn	1361	22	-20.3	863
ssa-miR-29de-3p	NM_001140047.1	Granulins precursor	GRN grn	1361	20	-21.7	863
ssa-miR-456-3p	NM_001140047.1	Granulins precursor	GRN grn	1361	22	-23.9	696
ssa-let-7b-3p	NM_001140048.1	K0141 protein (KIAA0141)	K0141 k0141	1004	22	-19.4	632
ssa-miR-200b-5p	NM_001140048.1	K0141 protein (KIAA0141)	K0141 k0141	1004	22	-19.4	200
ssa-miR-29c-5p	NM_001140048.1	K0141 protein (KIAA0141)	K0141 k0141	1004	23	-20.8	844
ssa-miR-146a-1-2-3p	NM_001140049.1	H/ACA ribonucleoprotein complex subunit 4 (dyskerin)	DKC1 dkc1	977	23	-19.2	1
ssa-miR-146a-3-3p	NM_001140049.1	H/ACA ribonucleoprotein complex subunit 4 (dyskerin)	DKC1 dkc1	977	22	-18.9	1
ssa-miR-29b-1-5p	NM_001140049.1	H/ACA ribonucleoprotein complex subunit 4 (dyskerin)	DKC1 dkc1	977	23	-20	338
ssa-miR-8159-5p	NM_001140050.1	MAP7 domain-containing protein 1	MA7D1 ma7d1	452	24	-19.3	27
ssa-miR-129-5p	NM_001140051.1	Endoplasmic reticulum-Golgi intermediate compartment protein 2 (endoplasmic reticulum-Golgi intermediate compartment protein 2 isoform X1)	ERGI2 ergi2	359	21	-18.7	128
ssa-miR-125a-2-3-3p	NM_001140053.1	Methylthioribulose-1-phosphate dehydratase (MTRu-1-P dehydratase) (EC 4.2.1.109) (APAF1-interacting protein homolog)	apip APIP	1545	22	-27.6	930
ssa-miR-125a-4-3p	NM_001140053.1	Methylthioribulose-1-phosphate dehydratase (MTRu-1-P dehydratase) (EC 4.2.1.109) (APAF1-interacting protein homolog)	apip APIP	1545	22	-29.4	930
ssa-miR-125b-3-3p	NM_001140053.1	Methylthioribulose-1-phosphate dehydratase (MTRu-1-P dehydratase) (EC 4.2.1.109) (APAF1-interacting protein homolog)	apip APIP	1545	22	-22.6	33
ssa-miR-132-1-2-5p	NM_001140053.1	Methylthioribulose-1-phosphate dehydratase (MTRu-1-P dehydratase) (EC 4.2.1.109) (APAF1-interacting protein homolog)	apip APIP	1545	22	-24.2	483
ssa-miR-21a-2-3p	NM_001140053.1	Methylthioribulose-1-phosphate dehydratase (MTRu-1-P dehydratase) (EC 4.2.1.109) (APAF1-interacting protein homolog)	apip APIP	1545	22	-20.2	900
ssa-miR-21b-3p	NM_001140053.1	Methylthioribulose-1-phosphate dehydratase (MTRu-1-P dehydratase) (EC 4.2.1.109) (APAF1-interacting protein homolog)	apip APIP	1545	22	-21.5	900
ssa-miR-221-5p	NM_001140053.1	Methylthioribulose-1-phosphate dehydratase (MTRu-1-P dehydratase) (EC 4.2.1.109) (APAF1-interacting protein homolog)	apip APIP	1545	23	-20.7	418
ssa-miR-26d-5p	NM_001140053.1	Methylthioribulose-1-phosphate dehydratase (MTRu-1-P dehydratase) (EC 4.2.1.109) (APAF1-interacting protein homolog)	apip APIP	1545	22	-20.6	317
ssa-miR-26d-5p	NM_001140053.1	Methylthioribulose-1-phosphate dehydratase (MTRu-1-P dehydratase) (EC 4.2.1.109) (APAF1-interacting protein homolog)	apip APIP	1545	22	-18.4	467
ssa-miR-29e-5p	NM_001140053.1	Methylthioribulose-1-phosphate dehydratase (MTRu-1-P dehydratase) (EC 4.2.1.109) (APAF1-interacting protein homolog)	apip APIP	1545	23	-22	1454
ssa-miR-731-5p	NM_001140053.1	Methylthioribulose-1-phosphate dehydratase (MTRu-1-P dehydratase) (EC 4.2.1.109) (APAF1-interacting protein homolog)	apip APIP	1545	23	-25.9	1309
ssa-miR-125b-3-3p	NM_001140054.1	Serine/threonine-protein kinase 16 (serine/threonine-protein kinase 16-like)	STK16 LOC106574867 stk16	1322	22	-23.8	970
ssa-miR-146d-1-3p	NM_001140054.1	Serine/threonine-protein kinase 16 (serine/threonine-protein kinase 16-like)	STK16 LOC106574867 stk16	1322	22	-18.7	410
ssa-miR-27a-2-5p	NM_001140054.1	Serine/threonine-protein kinase 16 (serine/threonine-protein kinase 16-like)	STK16 LOC106574867 stk16	1322	25	-18.7	182
ssa-miR-29a-5p	NM_001140054.1	Serine/threonine-protein kinase 16 (serine/threonine-protein kinase 16-like)	STK16 LOC106574867 stk16	1322	23	-22.3	164
ssa-miR-29d-5p	NM_001140054.1	Serine/threonine-protein kinase 16 (serine/threonine-protein kinase 16-like)	STK16 LOC106574867 stk16	1322	23	-22.5	4
ssa-miR-29e-5p	NM_001140054.1	Serine/threonine-protein kinase 16 (serine/threonine-protein kinase 16-like)	STK16 LOC106574867 stk16	1322	23	-20.6	164
ssa-miR-462a-3p	NM_001140054.1	Serine/threonine-protein kinase 16 (serine/threonine-protein kinase 16-like)	STK16 LOC106574867 stk16	1322	22	-28.9	249
ssa-miR-727b-3p	NM_001140054.1	Serine/threonine-protein kinase 16 (serine/threonine-protein kinase 16-like)	STK16 LOC106574867 stk16	1322	19	-24.1	24
ssa-miR-29b-2-5p	NM_001140055.1	CDC-like kinase 4 (EC 2.7.12.1) (Dual specificity protein kinase CLK4)	CLK4 clk4	725	25	-21.6	140
ssa-let-7b-3p	NM_001140056.1	Poly polymerase 12	PRP12 prp12	788	22	-21.6	303
ssa-let-7d-c-1-3p	NM_001140056.1	Poly polymerase 12	PRP12 prp12	788	22	-20.5	304
ssa-miR-26a-3-3p	NM_001140056.1	Poly polymerase 12	PRP12 prp12	788	22	-27.1	581
ssa-miR-459-3p	NM_001140057.1	Casein kinase II subunit alpha	CSK22 csk22	517	22	-20.8	196
ssa-miR-125a-1-3p	NM_001140059.1	EGF-containing fibulin-like extracellular matrix protein 2 (fibulin 4 precursor)	FBLN4 fbln4	936	22	-21	186
ssa-miR-26a-3-3p	NM_001140059.1	EGF-containing fibulin-like extracellular matrix protein 2 (fibulin 4 precursor)	FBLN4 fbln4	936	22	-19	86
ssa-miR-187-5p	NM_001140060.1	Peptidylprolyl isomerase (EC 5.2.1.8)	AIP aip	1279	24	-23.5	1180
ssa-miR-30c-d-1-3p	NM_001140060.1	Peptidylprolyl isomerase (EC 5.2.1.8)	AIP aip	1279	22	-21.7	741
ssa-miR-30c-d-1-3p	NM_001140060.1	Peptidylprolyl isomerase (EC 5.2.1.8)	AIP aip	1279	22	-20.2	814
ssa-miR-30d-2-3p	NM_001140060.1	Peptidylprolyl isomerase (EC 5.2.1.8)	AIP aip	1279	23	-19.7	741
ssa-miR-30d-2-3p	NM_001140060.1	Peptidylprolyl isomerase (EC 5.2.1.8)	AIP aip	1279	23	-18.2	814
ssa-miR-125a-2-3-3p	NM_001140061.1	Transmembrane protein 45B	TM45B tm45b	1183	22	-23.1	806
ssa-miR-125a-4-3p	NM_001140061.1	Transmembrane protein 45B	TM45B tm45b	1183	22	-25.2	806
ssa-miR-187-5p	NM_001140061.1	Transmembrane protein 45B	TM45B tm45b	1183	24	-22.9	739
ssa-miR-193a-5p	NM_001140061.1	Transmembrane protein 45B	TM45B tm45b	1183	21	-21.6	1037
ssa-miR-221-5p	NM_001140061.1	Transmembrane protein 45B	TM45B tm45b	1183	23	-23.5	997
ssa-miR-222b-5p	NM_001140061.1	Transmembrane protein 45B	TM45B tm45b	1183	22	-20.9	430
ssa-miR-29c-5p	NM_001140061.1	Transmembrane protein 45B	TM45B tm45b	1183	23	-19.3	1089
ssa-miR-727b-3p	NM_001140061.1	Transmembrane protein 45B	TM45B tm45b	1183	19	-18.5	843
ssa-miR-novel-2-3p	NM_001140061.1	Transmembrane protein 45B	TM45B tm45b	1183	22	-20.3	393
ssa-miR-122-5p	NM_001140062.1	Lumican (lumican precursor)	LUM lum	1425	22	-20.3	693
ssa-miR-29d-5p	NM_001140062.1	Lumican (lumican precursor)	LUM lum	1425	23	-21.7	820
ssa-miR-novel-1-3p	NM_001140062.1	Lumican (lumican precursor)	LUM lum	1425	21	-20.5	1056
ssa-miR-125b-3-3p	NM_001140063.1	Kunitz-type protease inhibitor 2 (Kunitz-type protease inhibitor 2 precursor)	SPIT2 spit2	924	22	-28.4	447
ssa-miR-731-3p	NM_001140063.1	Kunitz-type protease inhibitor 2 (Kunitz-type protease inhibitor 2 precursor)	SPIT2 spit2	924	22	-27	328
ssa-miR-125b-3-3p	NM_001140064.1	Abl interactor 1 (abl interactor 1 isoform X5)	ABI1 abi1	1325	22	-22.7	421
ssa-miR-27a-2-5p	NM_001140064.1	Abl interactor 1 (abl interactor 1 isoform X5)	ABI1 abi1	1325	25	-19.3	532
ssa-miR-29a-3p	NM_001140064.1	Abl interactor 1 (abl interactor 1 isoform X5)	ABI1 abi1	1325	20	-18.1	235
ssa-miR-29b-3p	NM_001140064.1	Abl interactor 1 (abl interactor 1 isoform X5)	ABI1 abi1	1325	22	-18.1	222
ssa-miR-29c-3p	NM_001140064.1	Abl interactor 1 (abl interactor 1 isoform X5)	ABI1 abi1	1325	22	-18.1	222
ssa-miR-29d-5p	NM_001140064.1	Abl interactor 1 (abl interactor 1 isoform X5)	ABI1 abi1	1325	23	-20.1	929
ssa-miR-29de-3p	NM_001140064.1	Abl interactor 1 (abl interactor 1 isoform X5)	ABI1 abi1	1325	20	-18.1	235
ssa-miR-146a-1-2-3p	NM_001140065.1	Metaxin-1	MTX1 mtx1	1587	23	-24.6	223
ssa-miR-146a-1-2-3p	NM_001140065.1	Metaxin-1	MTX1 mtx1	1587	23	-24	1190
ssa-miR-146a-3-3p	NM_001140065.1	Metaxin-1	MTX1 mtx1	1587	22	-21.9	1188
ssa-miR-146a-3-3p	NM_001140065.1	Metaxin-1	MTX1 mtx1	1587	22	-20.5	222
ssa-miR-146b-3p	NM_001140065.1	Metaxin-1	MTX1 mtx1	1587	22	-22.8	222
ssa-miR-146b-3p	NM_001140065.1	Metaxin-1	MTX1 mtx1	1587	22	-18.1	1188
ssa-miR-187-5p	NM_001140065.1	Metaxin-1	MTX1 mtx1	1587	24	-30.6	883
ssa-miR-18c-3p	NM_001140065.1	Metaxin-1	MTX1 mtx1	1587	22	-19.3	1183
ssa-miR-221-5p	NM_001140065.1	Metaxin-1	MTX1 mtx1	1587	23	-20.4	995
ssa-miR-29a-3p	NM_001140065.1	Metaxin-1	MTX1 mtx1	1587	20	-18.5	422
ssa-miR-29b-3p	NM_001140065.1	Metaxin-1	MTX1 mtx1	1587	22	-18.6	422
ssa-miR-29c-3p	NM_001140065.1	Metaxin-1	MTX1 mtx1	1587	22	-18.6	422
ssa-miR-8159-5p	NM_001140065.1	Metaxin-1	MTX1 mtx1	1587	24	-19.9	492
ssa-miR-novel-5-3p	NM_001140065.1	Metaxin-1	MTX1 mtx1	1587	22	-18.4	1093
ssa-miR-459-3p	NM_001140066.1	N-terminal asparagine amidohydrolase	NTAN1 ntan1	1280	22	-20.4	14
ssa-miR-462a-3p	NM_001140066.1	N-terminal asparagine amidohydrolase	NTAN1 ntan1	1280	22	-20.1	756
ssa-miR-200b-5p	NM_001140067.1	transcriptional activator protein Pur-beta	PURB purb	1643	22	-18	22
ssa-miR-8159-5p	NM_001140067.1	transcriptional activator protein Pur-beta	PURB purb	1643	24	-21	638
ssa-miR-29b-2-5p	NM_001140068.1	Ubiquitin carboxyl-terminal hydrolase (EC 3.4.19.12)	UCHL5 uchl5	926	25	-20.7	682
ssa-miR-8159-5p	NM_001140068.1	Ubiquitin carboxyl-terminal hydrolase (EC 3.4.19.12)	UCHL5 uchl5	926	24	-26.8	343
ssa-miR-146d-1-3p	NM_001140070.1	Histone-binding protein RBBP4	RBBP4 rbbp4	717	22	-21.7	591
ssa-miR-21a-2-3p	NM_001140071.1	Y-box-binding protein 2-A (Y-box-binding protein 2-A isoform X4)	YBX2A ybx2a	1140	22	-23.5	125
ssa-miR-21b-3p	NM_001140071.1	Y-box-binding protein 2-A (Y-box-binding protein 2-A isoform X4)	YBX2A ybx2a	1140	22	-23.5	125
ssa-let-7b-3p	NM_001140072.1	Secretagogin	SEGN segn	1258	22	-18.9	1140
ssa-miR-novel-5-3p	NM_001140072.1	Secretagogin	SEGN segn	1258	22	-24.2	352
ssa-miR-novel-5-3p	NM_001140072.1	Secretagogin	SEGN segn	1258	22	-24.2	457
ssa-miR-novel-5-3p	NM_001140072.1	Secretagogin	SEGN segn	1258	22	-24.2	597
ssa-miR-novel-5-3p	NM_001140072.1	Secretagogin	SEGN segn	1258	22	-24.2	632
ssa-miR-novel-5-3p	NM_001140072.1	Secretagogin	SEGN segn	1258	22	-24.2	702
ssa-miR-129-5p	NM_001140073.1	GTPase Era, mitochondrial	eral eral1	1086	21	-21.8	203
ssa-miR-187-5p	NM_001140073.1	GTPase Era, mitochondrial	eral eral1	1086	24	-29.4	765
ssa-miR-26a-3-3p	NM_001140073.1	GTPase Era, mitochondrial	eral eral1	1086	22	-18.1	569
ssa-miR-29b-3p	NM_001140073.1	GTPase Era, mitochondrial	eral eral1	1086	22	-20.3	525
ssa-miR-456-3p	NM_001140073.1	GTPase Era, mitochondrial	eral eral1	1086	22	-23.1	949
ssa-miR-184-3p	NM_001140075.1	POU domain class 2-associating factor 1 (POU domain class 2-associating factor 1 isoform X1)	OBF1 obf1 pou2af1	1156	22	-26.5	843
ssa-miR-192a-1-3p	NM_001140075.1	POU domain class 2-associating factor 1 (POU domain class 2-associating factor 1 isoform X1)	OBF1 obf1 pou2af1	1156	22	-22.3	382
ssa-miR-192b-5p	NM_001140075.1	POU domain class 2-associating factor 1 (POU domain class 2-associating factor 1 isoform X1)	OBF1 obf1 pou2af1	1156	22	-19.2	382
ssa-miR-30c-d-1-3p	NM_001140075.1	POU domain class 2-associating factor 1 (POU domain class 2-associating factor 1 isoform X1)	OBF1 obf1 pou2af1	1156	22	-21.3	594
ssa-miR-30c-d-1-3p	NM_001140075.1	POU domain class 2-associating factor 1 (POU domain class 2-associating factor 1 isoform X1)	OBF1 obf1 pou2af1	1156	22	-20.2	261
ssa-miR-30c-d-1-3p	NM_001140075.1	POU domain class 2-associating factor 1 (POU domain class 2-associating factor 1 isoform X1)	OBF1 obf1 pou2af1	1156	22	-18.9	553
ssa-miR-30d-2-3p	NM_001140075.1	POU domain class 2-associating factor 1 (POU domain class 2-associating factor 1 isoform X1)	OBF1 obf1 pou2af1	1156	23	-20.7	594
ssa-miR-30d-2-3p	NM_001140075.1	POU domain class 2-associating factor 1 (POU domain class 2-associating factor 1 isoform X1)	OBF1 obf1 pou2af1	1156	23	-19.7	553
ssa-miR-30d-2-3p	NM_001140075.1	POU domain class 2-associating factor 1 (POU domain class 2-associating factor 1 isoform X1)	OBF1 obf1 pou2af1	1156	23	-19.6	261
ssa-let-7b-3p	NM_001140076.1	CAAX prenyl protease (EC 3.4.24.84)	FACE1 face1	1090	22	-18.8	492
ssa-miR-731-3p	NM_001140076.1	CAAX prenyl protease (EC 3.4.24.84)	FACE1 face1	1090	22	-22.3	423
ssa-miR-727b-3p	NM_001140077.1	Myelin P0 protein precursor	MYP0 myp0	1402	19	-19.5	7
ssa-miR-193a-5p	NM_001140078.1	Alanyl-tRNA synthetase, cytoplasmic	SYAC AARS syac	713	21	-18	38
ssa-miR-727b-3p	NM_001140078.1	Alanyl-tRNA synthetase, cytoplasmic	SYAC AARS syac	713	19	-21.3	369
ssa-miR-183-5p	NM_001140079.1	Phospholipase B-like (EC 3.1.1.-)	PLBL1 plbl1	694	22	-19.1	4
ssa-miR-21a-2-3p	NM_001140079.1	Phospholipase B-like (EC 3.1.1.-)	PLBL1 plbl1	694	22	-19.3	439
ssa-miR-21b-3p	NM_001140079.1	Phospholipase B-like (EC 3.1.1.-)	PLBL1 plbl1	694	22	-19	439
ssa-miR-10b-5p	NM_001140080.1	Enolase-phosphatase E1 (EC 3.1.3.77) (2,3-diketo-5-methylthio-1-phosphopentane phosphatase) (MASA homolog)	enoph ENOPH1 enoph1 MASA masa	780	22	-25.9	610
ssa-miR-10d-5p	NM_001140080.1	Enolase-phosphatase E1 (EC 3.1.3.77) (2,3-diketo-5-methylthio-1-phosphopentane phosphatase) (MASA homolog)	enoph ENOPH1 enoph1 MASA masa	780	22	-27.5	610
ssa-miR-222b-5p	NM_001140081.1	Claudin-12 (claudin-12 isoform X1)	CLD12 cld12	1693	22	-20.7	1025
ssa-miR-29b-2-5p	NM_001140081.1	Claudin-12 (claudin-12 isoform X1)	CLD12 cld12	1693	25	-24.4	1514
ssa-miR-143-3p	NM_001140082.1	Interferon-induced transmembrane protein 5 (dispanin subfamily A member 2b-like)	IFM5 LOC106586181	1641	21	-18.3	82
ssa-miR-21a-2-3p	NM_001140082.1	Interferon-induced transmembrane protein 5 (dispanin subfamily A member 2b-like)	IFM5 LOC106586181	1641	22	-23.7	504
ssa-miR-21b-3p	NM_001140082.1	Interferon-induced transmembrane protein 5 (dispanin subfamily A member 2b-like)	IFM5 LOC106586181	1641	22	-23.4	504
ssa-miR-146a-1-2-3p	NM_001140083.1	GTP-binding protein 6	GTPB6 gtpb6	225	23	-20.8	51
ssa-miR-146a-3-3p	NM_001140083.1	GTP-binding protein 6	GTPB6 gtpb6	225	22	-18.4	65
ssa-miR-8158-3p	NM_001140083.1	GTP-binding protein 6	GTPB6 gtpb6	225	23	-18.9	159
ssa-miR-459-3p	NM_001140084.1	Adenylyl cyclase-associated protein	CAP1 cap1	1207	22	-22.7	733
ssa-miR-462a-5p	NM_001140084.1	Adenylyl cyclase-associated protein	CAP1 cap1	1207	23	-19.3	439
[truncated: 6,774 more rows]
